# Supplementary material for: One-pot activation–alkynylation–cyclization synthesis of 1,5-diacyl-5-hydroxypyrazolines in a consecutive three-component fashion
Source: publisher site journal article supplement (doi:10.3762/bjoc.15.136), 2019-06-19
Supplement: Additional file 1 [file 1860-5397-15-136-S1.pdf]

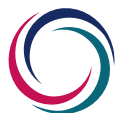

## Supporting Information

for

### **One-pot activation–alkynylation–cyclization synthesis of 1,5-diacyl-5-hydroxypyrazolines in a consecutive three-component fashion**

Christina Görgen, Katharina Boden, Guido J. Reiss, Walter Frank  
and Thomas J. J. Müller

*Beilstein J. Org. Chem.* **2019**, *15*, 1360–1370. doi:10.3762/bjoc.15.136

### **Experimental details, copies of NMR spectra and crystallographic data**

|          |                                                                                                                                                                             |     |
|----------|-----------------------------------------------------------------------------------------------------------------------------------------------------------------------------|-----|
| <b>1</b> | <b>General considerations</b> .....                                                                                                                                         | S3  |
| <b>2</b> | <b>Optimization studies</b> .....                                                                                                                                           | S4  |
| 2.1      | Optimization of 1,4-diphenylbut-3-yn-1,2-dione ( <b>3a</b> ) .....                                                                                                          | S4  |
| 2.2      | Synthesis of <i>tert</i> -butyl 5-benzoyl-5-hydroxy-3-phenyl-4,5-dihydro-1 <i>H</i> -pyrazole-1-carboxylate ( <b>5a</b> ) .....                                             | S5  |
| 2.3      | Optimization of <i>tert</i> -butyl 5-benzoyl-5-hydroxy-3-phenyl-4,5-dihydro-1 <i>H</i> -pyrazole-1-carboxylate ( <b>5b</b> ) .....                                          | S6  |
| 2.4      | Optimization of consecutive three-component synthesis of <i>tert</i> -butyl 5-benzoyl-5-hydroxy-3-phenyl-4,5-dihydro-1 <i>H</i> -pyrazole-1-carboxylate ( <b>5b</b> ) ..... | S8  |
| <b>3</b> | <b>Three-component synthesis of 1,5-diacyl-5-hydroxypyrazolines 5</b> .....                                                                                                 | S9  |
| 3.1      | General procedure (GP) .....                                                                                                                                                | S9  |
| 3.2      | (5-Hydroxy-3-phenyl-4,5-dihydro-1 <i>H</i> -pyrazol-1,5-diyl)bis(phenylmethanone) ( <b>5b</b> ) .....                                                                       | S10 |
| 3.3      | (5-Benzoyl-5-hydroxy-3-phenyl-4,5-dihydro-1 <i>H</i> -pyrazol-1-yl)(4-tolyl)methanone ( <b>5c</b> ) .....                                                                   | S11 |
| 3.4      | (5-Benzoyl-5-hydroxy-3-phenyl-4,5-dihydro-1 <i>H</i> -pyrazol-1-yl)(4-bromophenyl)methanone ( <b>5d</b> ) .....                                                             | S11 |
| 3.5      | (5-Benzoyl-5-hydroxy-3-phenyl-4,5-dihydro-1 <i>H</i> -pyrazol-1-yl)(thien-2-yl)methanone ( <b>5e</b> ) .....                                                                | S12 |
| 3.6      | (5-Benzoyl-5-hydroxy-3-phenyl-4,5-dihydro-1 <i>H</i> -pyrazol-1-yl)(furan-2-yl)methanone ( <b>5f</b> ) .....                                                                | S12 |
| 3.7      | 1-(5-Benzoyl-5-hydroxy-3-phenyl-4,5-dihydro-1 <i>H</i> -pyrazol-1-yl)-2-phenylethan-1-one ( <b>5g</b> ) .....                                                               | S13 |
| 3.8      | 1-(5-Benzoyl-5-hydroxy-3-phenyl-4,5-dihydro-1 <i>H</i> -pyrazol-1-yl)-2-methylpropan-1-one ( <b>5h</b> ) .....                                                              | S13 |
| 3.9      | (5-Benzoyl-5-hydroxy-3-phenyl-4,5-dihydro-1 <i>H</i> -pyrazol-1-yl)(cyclopropyl)methanone ( <b>5i</b> ) .....                                                               | S14 |
| 3.10     | 1-(5-Benzoyl-5-hydroxy-3-phenyl-4,5-dihydro-1 <i>H</i> -pyrazol-1-yl)-2,2-dimethylpropan-1-one ( <b>5j</b> ) .....                                                          | S14 |
| 3.11     | 1-(5-Benzoyl-5-hydroxy-3-phenyl-4,5-dihydro-1 <i>H</i> -pyrazol-1-yl)butan-1-one ( <b>5k</b> ) .....                                                                        | S15 |
| 3.12     | (5-Hydroxy-3-(4-methoxyphenyl)-4,5-dihydro-1 <i>H</i> -pyrazol-1,5-diyl)bis(phenylmethanone) ( <b>5l</b> ) .....                                                            | S15 |
| 3.13     | (3-(4-( <i>tert</i> -Butyl)phenyl)-5-hydroxy-4,5-dihydro-1 <i>H</i> -pyrazol-1,5-diyl)bis(phenylmethanone) ( <b>5m</b> ) .....                                              | S16 |
| 3.14     | (3-(4-Fluorophenyl)-5-hydroxy-4,5-dihydro-1 <i>H</i> -pyrazol-1,5-diyl)bis(phenylmethanone) ( <b>5n</b> ) .....                                                             | S16 |
| 3.15     | 4-(1,5-Dibenzoyl-5-hydroxy-4,5-dihydro-1 <i>H</i> -pyrazol-3-yl)benzonitrile ( <b>5o</b> ) .....                                                                            | S17 |
| 3.16     | (1-Benzoyl-5-hydroxy-3-phenyl-4,5-dihydro-1 <i>H</i> -pyrazol-5-yl)(mesityl)methanone ( <b>5p</b> ) .....                                                                   | S17 |
| 3.17     | (1-Benzoyl-5-hydroxy-3-phenyl-4,5-dihydro-1 <i>H</i> -pyrazol-5-yl)(thien-2-yl)methanone ( <b>5q</b> ) .....                                                                | S18 |
| 3.18     | (5-Hydroxy-3-(4-methoxyphenyl)-1-(thiophen-2-carbonyl)-4,5-dihydro-1 <i>H</i> -pyrazol-5-yl)(mesityl)methanone ( <b>5r</b> ) .....                                          | S18 |
| <b>4</b> | <b>Attempted aromatization of 1,5-diacyl-5-hydroxypyrazoline 5b</b> .....                                                                                                   | S19 |
| <b>5</b> | <b><sup>1</sup>H and <sup>13</sup>C NMR spectra</b> .....                                                                                                                   | S20 |
| 5.1      | <i>tert</i> -Butyl 5-benzoyl-5-hydroxy-3-phenyl-4,5-dihydro-1 <i>H</i> -pyrazole-1-carboxylate ( <b>5a</b> ) .....                                                          | S20 |
| 5.2      | (5-Hydroxy-3-phenyl-4,5-dihydro-1 <i>H</i> -pyrazol-1,5-diyl)bis(phenylmethanone) ( <b>5b</b> ) .....                                                                       | S22 |
| 5.3      | (5-Benzoyl-5-hydroxy-3-phenyl-4,5-dihydro-1 <i>H</i> -pyrazol-1-yl)(4-tolyl)methanone ( <b>5c</b> ) .....                                                                   | S23 |
| 5.4      | (5-Benzoyl-5-hydroxy-3-phenyl-4,5-dihydro-1 <i>H</i> -pyrazol-1-yl)(4-bromophenyl)methanone ( <b>5d</b> ) .....                                                             | S25 |
| 5.5      | (5-Benzoyl-5-hydroxy-3-phenyl-4,5-dihydro-1 <i>H</i> -pyrazol-1-yl)(thien-2-yl)methanone ( <b>5e</b> ) .....                                                                | S27 |

|          |                                                                                                                                                          |     |
|----------|----------------------------------------------------------------------------------------------------------------------------------------------------------|-----|
| 5.6      | (5-Benzoyl-5-hydroxy-3-phenyl-4,5-dihydro-1 <i>H</i> -pyrazol-1-yl)(furan-2-yl)methanone ( <b>5f</b> ) .....                                             | S28 |
| 5.7      | 1-(5-Benzoyl-5-hydroxy-3-phenyl-4,5-dihydro-1 <i>H</i> -pyrazol-1-yl)-2-phenylethan-1-one ( <b>5g</b> ) .....                                            | S29 |
| 5.8      | 1-(5-Benzoyl-5-hydroxy-3-phenyl-4,5-dihydro-1 <i>H</i> -pyrazol-1-yl)-2-methylpropan-1-one ( <b>5h</b> ) .....                                           | S30 |
| 5.9      | (5-Benzoyl-5-hydroxy-3-phenyl-4,5-dihydro-1 <i>H</i> -pyrazol-1-yl)(cyclopropyl)methanone ( <b>5i</b> ) .....                                            | S31 |
| 5.10     | 1-(5-Benzoyl-5-hydroxy-3-phenyl-4,5-dihydro-1 <i>H</i> -pyrazol-1-yl)-2,2-dimethylpropan-1-one ( <b>5j</b> ) .....                                       | S33 |
| 5.11     | 1-(5-Benzoyl-5-hydroxy-3-phenyl-4,5-dihydro-1 <i>H</i> -pyrazol-1-yl)butan-1-one ( <b>5k</b> ) .....                                                     | S34 |
| 5.12     | (5-Hydroxy-3-(4-methoxyphenyl)-4,5-dihydro-1 <i>H</i> -pyrazol-1,5-diyl)bis(phenyl-methanone) ( <b>5l</b> ) .....                                        | S36 |
| 5.13     | (3-(4-( <i>tert</i> -Butyl)phenyl)-5-hydroxy-4,5-dihydro-1 <i>H</i> -pyrazol-1,5-diyl)bis(phenyl-methanone) ( <b>5m</b> ) .....                          | S38 |
| 5.14     | (3-(4-Fluorophenyl)-5-hydroxy-4,5-dihydro-1 <i>H</i> -pyrazol-1,5-diyl)bis(phenyl-methanone) ( <b>5n</b> ) .....                                         | S40 |
| 5.15     | 4-(1,5-Dibenzoyl-5-hydroxy-4,5-dihydro-1 <i>H</i> -pyrazol-3-yl)benzonitrile ( <b>5o</b> ) .....                                                         | S42 |
| 5.16     | (1-Benzoyl-5-hydroxy-3-phenyl-4,5-dihydro-1 <i>H</i> -pyrazol-5-yl)(mesityl)methanone ( <b>5p</b> ) .....                                                | S44 |
| 5.17     | (1-Benzoyl-5-hydroxy-3-phenyl-4,5-dihydro-1 <i>H</i> -pyrazol-5-yl)(thien-2-yl)methanone ( <b>5q</b> ) .....                                             | S46 |
| 5.18     | (5-Hydroxy-3-(4-methoxyphenyl)-1-(thiophen-2-carbonyl)-4,5-dihydro-1 <i>H</i> -pyrazol-5-yl)(mesityl)methanone ( <b>5r</b> ) .....                       | S47 |
| <b>6</b> | <b>Crystal structures compounds 5a, 5r, and 6a</b> .....                                                                                                 | S49 |
| 6.1      | Crystal structure of <i>tert</i> -butyl 5-benzoyl-5-hydroxy-3-phenyl-4,5-dihydro-1 <i>H</i> -pyrazole-1-carboxylate ( <b>5a</b> ) .....                  | S50 |
| 6.2      | Crystal structure of (5-hydroxy-3-(4-methoxyphenyl)-1-(thiophen-2-carbonyl)-4,5-dihydro-1 <i>H</i> -pyrazol-5-yl) (mesityl)methanone ( <b>5r</b> ) ..... | S51 |
| 6.3      | Crystal structure of phenyl(3-phenyl-1 <i>H</i> -pyrazol-5-yl)methanone ( <b>6a</b> ) .....                                                              | S52 |

## 1 General considerations

All reactions were performed in oven-dried Schlenk vessels via septum and syringe technique under argon. 1,4-Dioxane was dried with the solvent drying and purification system *MBraun MB-SPS-800*. Triethylamine was predried with KOH pellets and then dried with sodium/benzophenone, distilled and stored in a Schlenk flask with KOH pellets under argon.

Phenylglyoxylic acid (**1a**) (98%, Merck/Alfa Aesar), mesitylglyoxylic acid (**1b**) (99%, ABCR), 2-thienylglyoxylic acid (**1c**) (98%, Alfa Aesar), phenylacetylene (**2a**) (98+%, Alfa Aesar), 4-methoxyphenylacetylene (**2b**) (99%, Alfa Aesar), 4-*tert*-butylphenylacetylene (**2c**) (96%, Acros Organics), *p*-fluorophenylacetylene (**2d**) (99%, Alfa Aesar), 4-ethynylbenzonitrile (**2e**) (94%, Sigma Aldrich), *tert*-butyl hydrazinecarboxylate (**4a**) (97%, Sigma Aldrich), 4-bromobenzohydrazide (**4d**) (98%, Acros Organics), butyrohdyrazide (**4k**) (95%, Alfa Aesar), oxalylchloride (>98%, Merck), copper(I)iodide (Sigma Aldrich), and 2-methoxyethanol (Merck) were purchased and used without further purification. Benzohydrazide (**4b**), 4-methylbenzohydrazide (**4c**), thiophene-2-carbohydrazide (**4e**), furan-2-carbohydrazide (**4f**), 2-phenylacetohydrazide (**4g**), isobutyrohdyrazide (**4h**), cyclopropane-carbohydrazide (**4i**), pivalohydrazide (**4j**), and butyrohdyrazide (**4k**) were prepared according to the literature.<sup>1</sup>

Flash chromatography was performed with silica gel 60 (0.040–0.063 mm) (*Fluka*) at 2 bar (compressed air). Prior to chromatography the crude products were adsorbed onto *Celite*® 545 (0.02–0.10 mm) (*Merck* or *Karl Roth*). The reactions were monitored by thin layer chromatography with TLC silica gel 60 F<sub>254</sub> aluminium foils (*Merck* or *Macherey-Nagel*) and detection was performed by a handheld UV lamp at  $\lambda_{\text{exc}}$  = 254 or 365 nm or developing the chromatogram with aqueous KMnO<sub>4</sub> solution.

<sup>1</sup>H, <sup>13</sup>C, and 135-DEPT NMR spectra were measured in CDCl<sub>3</sub> or CDCl<sub>3</sub>/tetramethylsilane on *Bruker Avance DRX-500*, *Bruker Avance III-300* or *Bruker Avance DRX-200* spectrometers. The resonances of CHCl<sub>3</sub>/CDCl<sub>3</sub> (CHCl<sub>3</sub>: <sup>1</sup>H  $\delta$  7.26, CDCl<sub>3</sub>: <sup>13</sup>C  $\delta$  77.0) were set as internal standards (if no SiMe<sub>4</sub> was added). HSQC and HMBC spectra were recorded on a *Bruker Avance III-300*. Electron ionization (EI) mass spectra were recorded on a *Finnigan MAT 8200* spectrometer. GC–MS analysis was performed with the GC/MS systems *GC2010* and *GC/MS-QP2010S* (*Shimadzu*). IR Spectra were recorded on a *Bruker Vector 22 FT-IR* (KBr Pellets) or *Shimadzu IRAffinity* (ATR). The intensities were labelled as s (strong), m (middle), w (weak). Combustion analyses were determined on a *Perkin Elmer Series II Analyser 2400* (C,H,N-Analyse) in the microanalytic laboratory of the Institut für Pharmazeutische und Medizinische Chemie, Heinrich-Heine-Universität Düsseldorf. Melting points (uncorrected) were determined with melting point microscope (*Reichert Thermovar*), a *PeakTech 6000A DC power adaptor*, and digital thermometer *D2400* (*Norma*).

X-ray structure analyses were performed in the group of Prof. Dr. W. Frank, Institut für Anorganische Chemie und Strukturchemie, Heinrich-Heine-Universität Düsseldorf, on a *Stoe IPDS* (opus), an *Xcalibur EOS* (no) and an *Oxford 4-Circle Diffractometer* with an *EOS plane detector* (exp).

---

<sup>1</sup> Kaushik, D.; Khan, S. A.; Chawla, G.; Kumar, S. *Eur. J. Med. Chem.* **2010**, *45*, 3943-3949. DOI: 10.1016/j.ejmech.2010.05.049

## 2 Optimization studies

### 2.1 Optimization of 1,4-diphenylbut-3-yn-1,2-dione (3a)

In an oven-dried Schlenk flask with magnetic stir bar and screw cap were placed phenylglyoxylic acid (**1a**, 150 mg, 1.00 mmol or 765 mg, 5.00 mmol) and dry 1,4-dioxane (2.5 mL or 25 mL) under argon (degassing by flushing with argon through a syringe needle for 5 min). Then, oxalyl chloride (0.09 mL, 1.00 mmol or 0.49 mL, 5.00 mmol) was added dropwise at room temperature (external water bath) by syringe through the septum to the reaction mixture and stirring was continued for 15 min. Then, the reaction mixture was stirred at 50 °C (preheated oil bath) for 4 h. After the mixture had cooled to room temperature CuI (10 mg, 0.05 mmol or 49 mg, 0.25 mmol), phenylacetylene (**2a**) (0.11 mL, 1.00 mmol or 0.58 mL, 5.00 mmol), and dry triethylamine (0.42 mL, 3.00 mmol or 2.1 mL, 15.0 mmol) were successively added. Stirring at room temperature (external water bath) was continued for 15 to 24 h (for details see Table S1). After complete conversion (monitored by TLC) and cooling to room temperature deionized water (5 mL) was added and the mixture was extracted with dichloromethane (4 × 10 mL). The combined organic phases were dried (anhydrous sodium sulfate) and the solvents were removed in vacuo. The crude product was adsorbed on celite® and purified by flash chromatography on silica gel (petroleum ether 40–60 °C/ethyl acetate 50:1) to give analytically pure 1,4-diphenylbut-3-yn-1,2-dione (**3a**) as yellow oil.

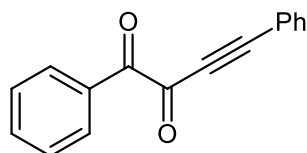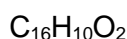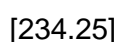

$^1\text{H}$  NMR ( $\text{CDCl}_3$ , 500 MHz):  $\delta$  7.39–7.43 (m, 2 H), 7.48–7.56 (m, 3 H), 7.63–7.70 (m, 3 H), 8.07–8.10 (m, 2 H).  $^{13}\text{C}$  NMR ( $\text{CDCl}_3$ , 125 MHz):  $\delta$  87.0 ( $\text{C}_{\text{quat}}$ ), 99.1 ( $\text{C}_{\text{quat}}$ ), 119.1 ( $\text{C}_{\text{quat}}$ ), 128.7 (CH), 128.9 (CH), 130.5 (CH), 131.5 ( $\text{C}_{\text{quat}}$ ), 131.7 (CH), 133.6 (CH), 134.9 (CH), 178.5 ( $\text{C}_{\text{quat}}$ ), 188.4 ( $\text{C}_{\text{quat}}$ ). EI+MS ( $m/z$  (%)): 234 ( $\text{M}^+$ , 0.4), 206 ( $(\text{M}-\text{CO})^+$ , 3), 178 ( $(\text{M}-\text{C}_2\text{O}_2)^+$ , 31), 129 ( $(\text{M}-\text{C}_7\text{H}_5\text{O})^+$ , 71), 105 ( $\text{C}_7\text{H}_5\text{O}^+$ , 100), 85 (11), 77 ( $\text{C}_6\text{H}_5^+$ , 38), 75 (11), 71 (15), 57 (13). IR:  $\tilde{\nu}$  [ $\text{cm}^{-1}$ ]: 3065 (w), 2927 (w), 2191 (s), 1656 (s), 1595 (m), 1489 (w), 1449 (m), 1249 (m), 1182 (w), 1108 (s), 1025 (w), 1000 (w), 924 (m), 816 (w), 778 (m), 759 (m), 738 (m), 685 (s), 611 (w), 538 (w). Anal. calcd. for  $\text{C}_{16}\text{H}_{10}\text{O}_2$  (234.3): C 82.04, H 4.30; Found: C 82.13, H 4.31.

GC-MS ( $m/z$  (%)):  $R_t$  = 14.87 min. 234 ( $\text{M}^+$ , 6), 178 ( $(\text{M}-\text{C}_2\text{O}_2)^+$ , 21), 129 ( $(\text{M}-\text{C}_7\text{H}_5\text{O})^+$ , 57), 105 ( $\text{C}_7\text{H}_5\text{O}^+$ , 100), 77 ( $\text{C}_6\text{H}_5^+$ , 92), 75 (40), 74 (17), 51 (66), 50 (20).

**Table S1:** Optimization of the activation–alkynylation synthesis of 1,4-diphenylbut-3-yne-1,2-dione (**3a**).

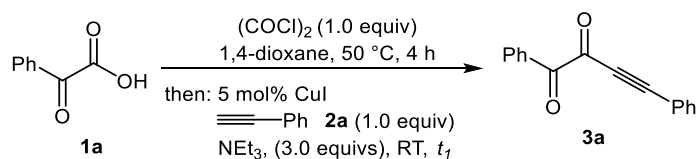

| Entry                | scale            | $c_0$ ( <b>1a</b> ) | $t_1$       | 1,4-diphenylbut-3-yne-1,2-dione ( <b>3a</b> ) |
|----------------------|------------------|---------------------|-------------|-----------------------------------------------|
| 1 <sup>1</sup>       | 5.00 mmol        | 0.2 M               | 24 h        | 61%                                           |
| 2 <sup>2</sup>       | 5.00 mmol        | 0.2 M               | 24 h        | 63%                                           |
| 3 <sup>2</sup>       | 1.00 mmol        | 0.2 M               | 24 h        | 65%                                           |
| 4 <sup>2</sup>       | 1.00 mmol        | 0.2 M               | 20 h        | 65%                                           |
| 5 <sup>2</sup>       | 1.00 mmol        | 0.2 M               | 15 h        | 65%                                           |
| <b>6<sup>2</sup></b> | <b>1.00 mmol</b> | <b>0.4 M</b>        | <b>15 h</b> | <b>76%</b>                                    |
| 7 <sup>2,3</sup>     | 1.00 mmol        | 0.4 M               | 15 h        | 70%                                           |

<sup>1</sup>Triethylamine dried with sodium. <sup>2</sup>Triethylamine (purest, Appli Chem GmbH, 99%), dried with KOH. <sup>3</sup>Performed in a microwave vessel.

## 2.2 Synthesis of *tert*-butyl 5-benzoyl-5-hydroxy-3-phenyl-4,5-dihydro-1*H*-pyrazole-1-carboxylate (**5a**)

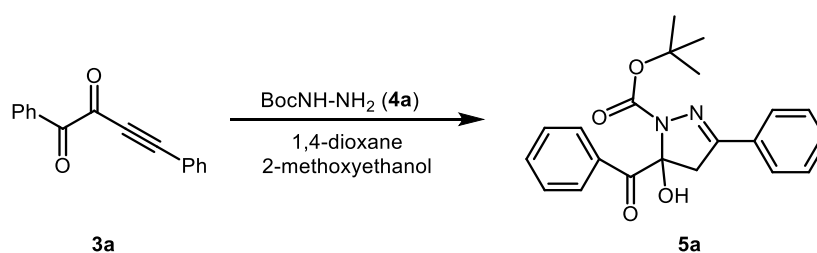

In a dry screw-cap Schlenk vessel with a magnetic stirring bar 1,4-diphenylbut-3-yne-1,2-dione (**3a**, 238 mg, 1.02 mmol) was dissolved in 1,4-dioxane (5.1 mL) under argon. Then, *tert*-butyl carbazate (**4a**, 136 mg, 1.02 mmol) and 2-methoxyethanol (1.02 mL) were added. The reaction mixture was heated at 100 °C (preheated oil bath) for 24 h. After cooling to room temperature the solvents were removed in vacuo and the crude product was adsorbed on celite® and purified by flash chromatography on silica gel (petroleum ether/ethyl acetate 20:1) to give *tert*-butyl 5-benzoyl-5-hydroxy-3-phenyl-4,5-dihydro-1*H*-pyrazole-1-carboxylate (**5a**, 310 mg, 83%) as colorless solid, Mp 155 °C;  $R_f$  (petroleum ether/ethyl acetate 20:1): 0.05.

<sup>1</sup>H NMR ( $\text{CDCl}_3$ , 300 MHz):  $\delta$  1.23 (s, 7 H), 1.46 (s, 2 H), 3.48 (d,  $J$  = 18.3 Hz, 1 H), 3.76 (d,  $J$  = 18.3 Hz, 1 H), 5.63 (br, 1 H), 7.37–7.49 (m, 5 H), 7.53–7.66 (m, 1 H), 7.72–7.87 (m, 2 H), 7.87–

7.95 (m, 2 H).  $^{13}\text{C}$  NMR ( $\text{CDCl}_3$ , 75 MHz):  $\delta$  27.7 ( $\text{CH}_3$ ), 47.7 ( $\text{CH}_2$ ), 83.2 ( $\text{C}_{\text{quat}}$ ), 90.5 ( $\text{C}_{\text{quat}}$ ), 126.9 (CH), 128.7 (CH), 129.1 (CH), 129.2 (CH), 130.4 (CH), 130.8 ( $\text{C}_{\text{quat}}$ ), 131.1 ( $\text{C}_{\text{quat}}$ ), 134.4 (CH), 149.7 ( $\text{C}_{\text{quat}}$ ), 150.9 ( $\text{C}_{\text{quat}}$ ), 194.2 ( $\text{C}_{\text{quat}}$ ). MS (EI),  $m/z$ : 261 ( $(\text{M} - \text{PhCO})^+$ , 5), 248 ( $(\text{M} - \text{tBuOCO}_2\text{H})^+$ , 16), 205 (9), 162 (11), 161 ( $(\text{M} - \text{PhCO} - \text{CH}_2=\text{CMe}_2 - \text{CO}_2)^+$ , 100), 105 ( $\text{PhCO}^+$ , 23), 77 ( $\text{C}_6\text{H}_5^+$ , 16), 57 ( $\text{C}_4\text{H}_9^+$ , 15). IR (ATR),  $\tilde{\nu}$  [ $\text{cm}^{-1}$ ]: 3030 (w), 1721 (s), 1649 (m), 1622 (w), 1533 (s), 1493 (w), 1410 (m), 1383 (w), 1364 (w), 1341 (s), 1294 (m), 1267 (m), 1246 (s), 1233 (s), 1188 (m), 1153 (s), 1134 (m), 1072 (w), 1042 (s), 993 (w), 982 (w), 932 (w), 872 (s), 816 (m), 756 (s), 691 (s), 610 (m). Anal. calcd. for  $\text{C}_{21}\text{H}_{22}\text{N}_2\text{O}_4$  (366.4): C 68.84, H 6.05, N 7.65; Found: C 68.87, H 6.08, N 7.66.

### 2.3 Optimization of (5-hydroxy-3-phenyl-4,5-dihydro-1H-pyrazole-1,5-diyl)bis(phenyl-methanone) (**5b**)

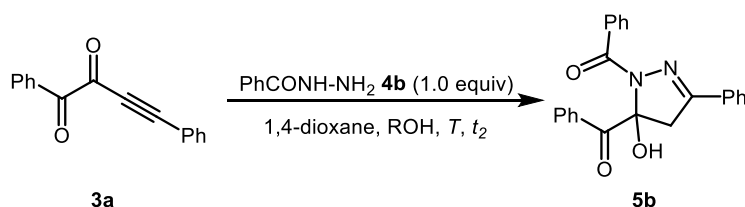

In a dry screw-cap microwave vessel with a magnetic stirring bar ynedione **3a** (47 mg, 0.2 mmol), benzohydrazide (**4b**), 1,4-dioxane (1.0 mL) and 2-methoxyethanol (0.2 mL) were added and the reaction mixture was placed in the microwave cavity or the preheated oil bath at the temperature and for the time indicated (for experimental details, see Table S2). The conversion was monitored by GC–MS. Only for full conversion and after cooling to room temperature and work up (vide supra) the residue was chromatographed on silica gel (petroleum ether/ethyl acetate 5:1) and isolated as colorless solid, Mp 152 °C;  $R_f$  (petroleum ether/ethyl acetate 5:1): 0.15 (vide infra for spectroscopic and analytical data).

GC-MS ( $m/z$  (%)):  $R_t$ : 17,30 min. 248 ( $(\text{M}-\text{C}_7\text{H}_5\text{O}-\text{H}_2\text{O})^+$ , 34), 115 (10), 112 (14), 105 ( $\text{C}_7\text{H}_5\text{O}^+$ , 48), 89 (11), 77 ( $\text{C}_6\text{H}_5^+$ , 100), 51 (50), 50 (13).  $R_t$ : 20,17 min. 248 ( $(\text{M}-\text{C}_7\text{H}_5\text{O}-\text{H}_2\text{O})^+$ , 22), 247 (13), 145 (44), 105 ( $\text{C}_7\text{H}_5\text{O}^+$ , 13), 104 (100), 103 (27), 102 (10), 90 (12), 89 (21), 78 (11), 77 ( $\text{C}_6\text{H}_5^+$ , 63), 76 (32), 68 (19), 63 (19), 51 (36), 50 (17).  $R_t$ : 22,43 min. 352 ( $(\text{M}-\text{H}_2\text{O})^+$ , 8), 248 ( $(\text{M}-\text{C}_7\text{H}_5\text{O}-\text{H}_2\text{O})^+$ , 1), 105 ( $\text{C}_7\text{H}_5\text{O}^+$ , 100), 77 ( $\text{C}_6\text{H}_5^+$ , 71), 51 (18).  $R_t$ : 24,25 min. 105 ( $\text{C}_7\text{H}_5\text{O}^+$ , 100), 77 ( $\text{C}_6\text{H}_5^+$ , 45), 51 (19).  $R_t$ : 25,55 min. 105 ( $\text{C}_7\text{H}_5\text{O}^+$ , 100), 77 ( $\text{C}_6\text{H}_5^+$ , 52), 51 (14).

**Table S2:** Optimization of the cyclization step of 1,5-diacyl-5-hydroxypyrazoline **5b**.<sup>[a]</sup>

| Entr<br>y                      | ROH                               | <b>4b</b>       | <i>T</i>   | <i>t</i> <sub>2</sub> | 1,5-diacyl-5-hydroxypyrazoline <b>5b</b> |                         |
|--------------------------------|-----------------------------------|-----------------|------------|-----------------------|------------------------------------------|-------------------------|
|                                | [mL]                              | [mg]<br>(mmol)  | [°C]       | [min]                 | GC-Conversion                            | [mg] (%) <sup>[b]</sup> |
| 1 <sup>[c]</sup>               | 2-methoxyethanol<br>(0.2)         | 27.2 (0.20)     | 100        | 60                    | incomplete<br>conversion <sup>[d]</sup>  | (n.i.)                  |
| 2 <sup>[c]</sup>               | 2-methoxyethanol<br>(0.2)         | 27.2 (0.20)     | 150        | 60                    | incomplete<br>conversion <sup>[d]</sup>  | (n.i.)                  |
| 3 <sup>[c]</sup>               | 2-methoxyethanol<br>(0.2)         | 41.0 (0.30)     | 150        | 60                    | complete conversion <sup>[e]</sup>       | (n.i.)                  |
| 4 <sup>[c]</sup>               | 2-methoxyethanol<br>(0.2)         | 34.0 (0.25)     | 150        | 60                    | complete conversion <sup>[d]</sup>       | (n.i.)                  |
| 5 <sup>[c]</sup>               | 2-methoxyethanol<br>(0.2)         | 33.0 (0.24)     | 150        | 60                    | complete conversion <sup>[d]</sup>       | (n.i.)                  |
| 6 <sup>[c]</sup>               | 2-methoxyethanol<br>(0.2)         | 30.0 (0.22)     | 150        | 60                    | incomplete<br>conversion <sup>[d]</sup>  | (n.i.)                  |
| 7 <sup>[c]</sup>               | 2-methoxyethanol<br>(0.2)         | 33.0 (0.24)     | 150        | 30                    | complete conversion <sup>[d]</sup>       | (n.i.)                  |
| 8 <sup>[c]</sup>               | 2-methoxyethanol<br>(0.2)         | 33.0 (0.24)     | 150        | 15                    | complete conversion <sup>[d]</sup>       | (n.i.)                  |
| 9 <sup>[c]</sup>               | 2-methoxyethanol<br>(0.2)         | 33.0 (0.24)     | 150        | 5                     | incomplete<br>conversion <sup>[d]</sup>  | (n.i.)                  |
| 10 <sup>[c]</sup>              | 2-methoxyethanol<br>(0.2)         | 33.0 (0.24)     | 100        | 10                    | incomplete<br>conversion <sup>[d]</sup>  | (n.i.)                  |
| 11 <sup>[c]</sup>              | 2-methoxyethanol<br>(0.2)         | 33.0 (0.24)     | 125        | 10                    | incomplete<br>conversion <sup>[d]</sup>  | (n.i.)                  |
| <b>12<sup>[c,e]</sup></b><br>J | <b>2-methoxyethanol<br/>(0.2)</b> | 136.4<br>(1.20) | <b>175</b> | <b>5</b>              | <b>full conversion<sup>[d]</sup></b>     | <b>348 (94)</b>         |
| 13 <sup>[c,e]</sup><br>J       | ethylene glycol<br>(0.2)          | 136.4<br>(1.20) | 175        | 5                     | full conversion <sup>[d]</sup>           | 356 (96)                |
| 14 <sup>[c,e]</sup><br>J       | ethanol (0.2)                     | 136.4<br>(1.20) | 175        | 5                     | full conversion <sup>[d]</sup>           | 322 (87)                |
| <b>15<sup>[f]</sup></b><br>J   | <b>2-methoxyethanol<br/>(0.2)</b> | 136.4<br>(1.20) | <b>175</b> | <b>5</b>              | <b>full conversion<sup>[d]</sup></b>     | <b>333 (90)</b>         |
| 16 <sup>[e,g]</sup><br>J       | 2-methoxyethanol<br>(0.2)         | 136.4<br>(1.20) | 175        | 5                     | full conversion <sup>[d]</sup>           | 345 (93)                |

[a] *c*<sub>0</sub>(**3a**) = 0.17 M; 1,4-dioxane (1.0 mL). [b] Isolated yield (n.i. = not isolated). [c] Dielectric heating in a microwave cavity (*T* is the set temperature and *t*<sub>2</sub> is the hold time). [d] As monitored by GC–MS. [e] On a 1.00 mmol scale (**3a**). [f] On a 1.00 mmol scale (**3a**), *c*<sub>0</sub>(**3a**) = 0.34 M; *c*<sub>0</sub>(**4b**) = 0.40 M. 1,4-dioxane (1.0 mL). [g] Conductive heating in an oil bath at preheated temperature *T*.



## 2.4 Optimization of consecutive three-component synthesis of (5-hydroxy-3-phenyl-4,5-dihydro-1*H*-pyrazole-1,5-diyl)bis(phenyl-methanone) (**5b**)

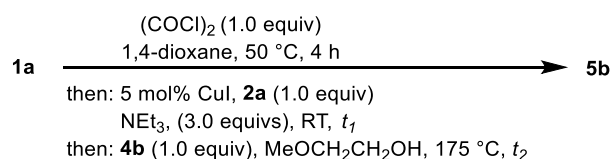

In an oven-dried Schlenk flask with magnetic stirring bar and screw cap were placed phenylglyoxylic acid (**1a**, 150 mg, 1.00 mmol) and dry 1,4-dioxane (2.5 mL) under argon. Then, oxalyl chloride (0.09 mL, 1.00 mmol) was added dropwise at room temperature (external water bath) to the solution. Then, the reaction mixture was stirred at 50 °C (preheated oil bath) for 4 h. After the mixture had cooled to room temperature CuI (10 mg, 0.05 mmol), phenylacetylene (**2a**, 0.11 mL, 1.00 mmol), and dry triethylamine (0.42 mL, 3.00 mmol) were successively added and stirring at room temperature (external water bath) was continued for 15 h. Then, hydrazide **4b** (136.4 mg, 1.20 mmol) and 2-methoxyethanol (1.0 mL) were added and the reaction mixture was placed in the microwave cavity or the preheated oil bath at the temperature and for the time indicated (for experimental details, see Table S3). Only for full conversion and after cooling to room temperature and work up (vide supra) the residue was chromatographed on silica gel (petroleum ether/ethyl acetate 5:1) and isolated as colorless solid, Mp 152 °C;  $R_f$  (petroleum ether/ethyl acetate 5:1): 0.15 (vide infra for spectroscopic and analytical data).

**Table S3:** Optimization of the consecutive three-component synthesis of 1,5-diacyl-5-hydroxypyrazoline **5b**.

| $  \begin{array}{c}  \text{1a} \xrightarrow[\begin{array}{l} \text{then: 5 mol\% CuI, 2a (1.0 equiv)} \\ \text{NEt}_3, (3.0 \text{ equivs}), \text{RT, 15 h} \\ \text{then: 4b (1.0 equiv), MeOCH}_2\text{CH}_2\text{OH, 175 }^\circ\text{C, } t_2 \end{array}]{\begin{array}{l} (\text{COCl})_2 (1.0 \text{ equiv}) \\ \text{1,4-dioxane, 50 }^\circ\text{C, 4 h} \end{array}} \text{5b}  \end{array}  $ |                    |             |                                                                          |
|-----------------------------------------------------------------------------------------------------------------------------------------------------------------------------------------------------------------------------------------------------------------------------------------------------------------------------------------------------------------------------------------------------------|--------------------|-------------|--------------------------------------------------------------------------|
| Entry                                                                                                                                                                                                                                                                                                                                                                                                     | $c_0(\mathbf{1a})$ | $t_2$ [min] | 1,5-diacyl-5-hydroxypyrazoline <b>5b</b> , yield [mg] (%) <sup>[a]</sup> |
| 1 <sup>[b]</sup>                                                                                                                                                                                                                                                                                                                                                                                          | 0.4 M              | 5           | 137 (37)                                                                 |
| 2 <sup>[b]</sup>                                                                                                                                                                                                                                                                                                                                                                                          | 0.25 M             | 5           | 119 (32)                                                                 |
| 3 <sup>[b]</sup>                                                                                                                                                                                                                                                                                                                                                                                          | 0.25 M             | 10          | 130 (35)                                                                 |
| 4 <sup>[c]</sup>                                                                                                                                                                                                                                                                                                                                                                                          | 0.4 M              | 10          | no product formation <sup>[d]</sup>                                      |
| 5 <sup>[e,f]</sup>                                                                                                                                                                                                                                                                                                                                                                                        | 0.4 M              | 5           | no product formation <sup>[d]</sup>                                      |
| 6 <sup>[e]</sup>                                                                                                                                                                                                                                                                                                                                                                                          | 0.4 M              | 10          | 237 (64)                                                                 |
| 7 <sup>[e]</sup>                                                                                                                                                                                                                                                                                                                                                                                          | 0.4 M              | 20          | 255 (69)                                                                 |
| 8 <sup>[e]</sup>                                                                                                                                                                                                                                                                                                                                                                                          | 0.4 M              | 30          | 289 (78)                                                                 |
| 9 <sup>[e]</sup>                                                                                                                                                                                                                                                                                                                                                                                          | 0.4 M              | 45          | 292 (79)                                                                 |

[a] Isolated yield. [b] Dielectric heating in a microwave cavity ( $T$  is set to 175 °C and  $t_2$  is the hold time). [c] Dielectric heating in a microwave cavity ( $T$  is set to 150 °C and  $t_2$  is the hold time). [d] As monitored by GC-MS. [e] Conductive heating in an oil bath at preheated temperature  $T = 175$  °C. [f] 2.00 equivs of NEt<sub>3</sub> were added.

### 3 Three-component synthesis of 1,5-diacyl-5-hydroxypyrazolines **5**

#### 3.1 General procedure (GP)

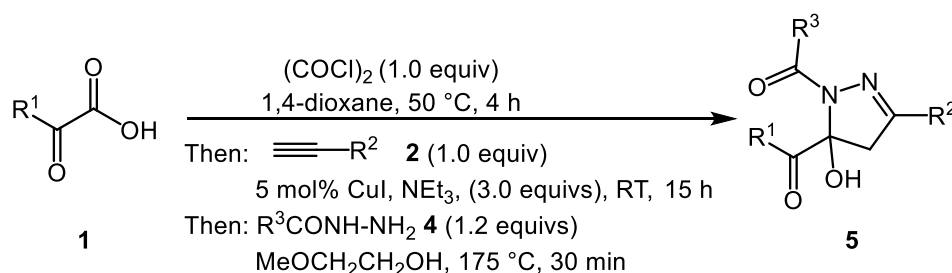

In an oven-dried Schlenk flask with magnetic stirring bar and screw cap were placed glyoxylic acid **1** (1.00 mmol) and dry 1,4-dioxane (2.5 mL) under argon (for experimental details see Table S4). Then, oxalyl chloride (0.09 mL, 1.00 mmol) was added dropwise at room temperature (external water bath) and the reaction mixture was stirred at 50 °C (preheated oil bath) for 4 h. After the mixture had cooled to room temperature CuI (10 mg, 0.05 mmol), alkyne **2** (1.00 mmol), and dry triethylamine (0.42 mL, 3.00 mmol) were successively added. Stirring at room temperature (external water bath) was continued for 15 h. Then, hydrazide **3** (1.20 mmol) and 2-methoxyethanol (1.0 mL) were added and the reaction mixture was stirred at 175 °C (preheated oil bath) for 30 min. After complete conversion (monitored by TLC) and cooling to room temperature deionized water (5 mL) was added and the mixture was extracted with dichloromethane (4 × 5 mL). The combined organic phases were dried with anhydrous sodium sulfate and the solvents were removed in vacuo. The crude product was adsorbed on celite® and purified by flash chromatography on silica gel (petrolether 40–60 °C/ethyl acetate) to give analytically pure 1,5-diacyl-5-hydroxypyrazolines **5**.

**Table S4:** Experimental details of the three-component synthesis of 1,5-diacyl-5-hydroxypyrazolines **5b–r**.

| Entry | Glyoxylic acid <b>1</b>         | Alkyne <b>2</b>                  | Hydrazide <b>4</b>              | 1,5-Diacyl-5-hydroxypyrazolines <b>5b–r</b> |
|-------|---------------------------------|----------------------------------|---------------------------------|---------------------------------------------|
| 1     | 150 mg (1.00 mmol) of <b>1a</b> | 0.11 mL (1.00 mmol) of <b>2a</b> | 163 mg (1.20 mmol) of <b>4b</b> | 291 mg (78%) of <b>5b</b>                   |
| 2     | 150 mg (1.00 mmol) of <b>1a</b> | 0.11 mL (1.00 mmol) of <b>2a</b> | 180 mg (1.20 mmol) of <b>4c</b> | 209 mg (55%) of <b>5c</b>                   |
| 3     | 150 mg (1.00 mmol) of <b>1a</b> | 0.11 mL (1.00 mmol) of <b>2a</b> | 232 mg (1.20 mmol) of <b>4d</b> | 185 mg (41%) of <b>5d</b>                   |
| 4     | 150 mg (1.00 mmol) of <b>1a</b> | 0.11 mL (1.00 mmol) of <b>2a</b> | 170 mg (1.20 mmol) of <b>4e</b> | 268 mg (71%) of <b>5e</b>                   |
| 5     | 150 mg (1.00 mmol) of <b>1a</b> | 0.11 mL (1.00 mmol) of <b>2a</b> | 151 mg (1.20 mmol) of <b>4f</b> | 241 mg (67%) of <b>5f</b>                   |
| 6     | 150 mg (1.00 mmol) of <b>1a</b> | 0.11 mL (1.00 mmol) of <b>2a</b> | 180 mg (1.20 mmol) of <b>4g</b> | 228 mg (59%) of <b>5g</b>                   |
| 7     | 150 mg (1.00 mmol) of <b>1a</b> | 0.11 mL (1.00 mmol) of <b>2a</b> | 123 mg (1.20 mmol) of <b>4h</b> | 222 mg (66%) of <b>5h</b>                   |

| Entry | Glyoxylic acid <b>1</b>         | Alkyne <b>2</b>                  | Hydrazide <b>4</b>              | 1,5-Diacyl-5-hydroxypyrazolines <b>5b-r</b> |
|-------|---------------------------------|----------------------------------|---------------------------------|---------------------------------------------|
| 8     | 150 mg (1.00 mmol) of <b>1a</b> | 0.11 mL (1.00 mmol) of <b>2a</b> | 120 mg (1.20 mmol) of <b>4i</b> | 232 mg (69%) of <b>5i</b>                   |
| 9     | 150 mg (1.00 mmol) of <b>1a</b> | 0.11 mL (1.00 mmol) of <b>2a</b> | 139 mg (1.20 mmol) of <b>4j</b> | 203 mg (58%) of <b>5j</b>                   |
| 10    | 150 mg (1.00 mmol) of <b>1a</b> | 0.11 mL (1.00 mmol) of <b>2a</b> | 129 mg (1.20 mmol) of <b>4k</b> | 111 mg (33%) of <b>5k</b>                   |
| 11    | 150 mg (1.00 mmol) of <b>1a</b> | 0.13 mL (1.00 mmol) of <b>2b</b> | 163 mg (1.20 mmol) of <b>4b</b> | 220 mg (55%) of <b>5l</b>                   |
| 12    | 150 mg (1.00 mmol) of <b>1a</b> | 0.19 mL (1.00 mmol) of <b>2c</b> | 163 mg (1.20 mmol) of <b>4b</b> | 293 mg (69%) of <b>5m</b>                   |
| 13    | 150 mg (1.00 mmol) of <b>1a</b> | 121 mg (1.00 mmol) of <b>2d</b>  | 163 mg (1.20 mmol) of <b>4b</b> | 256 mg (66%) of <b>5n</b>                   |
| 14    | 150 mg (1.00 mmol) of <b>1a</b> | 131 mg (1.00 mmol) of <b>2e</b>  | 163 mg (1.20 mmol) of <b>4b</b> | 113 mg (29%) of <b>5o</b>                   |
| 15    | 194 mg (1.00 mmol) of <b>1b</b> | 0.11 mL (1.00 mmol) of <b>2a</b> | 163 mg (1.20 mmol) of <b>4b</b> | 194 mg (47%) of <b>5p</b>                   |
| 16    | 159 mg (1.00 mmol) of <b>1c</b> | 0.11 mL (1.00 mmol) of <b>2a</b> | 163 mg (1.20 mmol) of <b>4b</b> | 275 mg (73%) of <b>5q</b>                   |
| 17    | 194 mg (1.00 mmol) of <b>1b</b> | 0.13 mL (1.00 mmol) of <b>2b</b> | 170 mg (1.20 mmol) of <b>4e</b> | 172 mg (38%) of <b>5r</b>                   |

### 3.2 (5-Hydroxy-3-phenyl-4,5-dihydro-1H-pyrazol-1,5-diyl)bis(phenylmethanone) (**5b**)

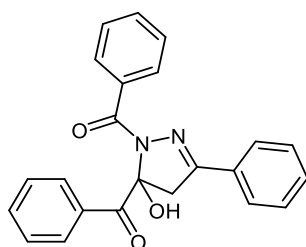

According to the GP and chromatography on silica gel (petroleum ether/ethyl acetate 5:1) compound **5b** (291 mg, 78%) was obtained as colorless solid, Mp 152 °C;  $R_f$  (petroleum ether/ethyl acetate 5:1): 0.15.  $^1\text{H}$  NMR ( $\text{CDCl}_3$ , 300 MHz):  $\delta$  3.54 (d,  $J$  = 18.5 Hz, 1 H), 3.76 (d,  $J$  = 18.5 Hz, 1 H), 5.60-6.08 (br, 1 H), 7.36-7.62 (m, 9 H), 7.72-7.83 (m, 2 H), 7.90-8.05 (m, 4 H).  $^{13}\text{C}$  NMR ( $\text{CDCl}_3$ , 75 MHz):  $\delta$  45.6 ( $\text{CH}_2$ ), 92.2 ( $\text{C}_{\text{quat}}$ ), 126.9 (CH), 127.8 (CH), 128.9 (CH)\*, 129.0 (CH), 130.2 (CH), 130.7 ( $\text{C}_{\text{quat}}$ ), 130.9 (CH), 131.7 (CH), 131.8 ( $\text{C}_{\text{quat}}$ ), 132.9 ( $\text{C}_{\text{quat}}$ ), 133.9 (CH), 153.1 ( $\text{C}_{\text{quat}}$ ), 166.7 ( $\text{C}_{\text{quat}}$ ), 193.4 ( $\text{C}_{\text{quat}}$ ); \*broadened signal. MS (EI),  $m/z$ : 352 ( $(\text{M} - \text{H}_2\text{O})^+$ , 2), 266 (11), 265 ( $(\text{M} - \text{C}_7\text{H}_5\text{O})^+$ , 59), 248 ( $(\text{M} - \text{C}_7\text{H}_5\text{O} - \text{H}_2\text{O})^+$ , 20), 105 ( $\text{C}_7\text{H}_5\text{O}^+$ , 100), 77 ( $\text{C}_6\text{H}_5^+$ , 34). IR (ATR),  $\tilde{\nu}$  [ $\text{cm}^{-1}$ ]: 3333 (w), 1697 (m), 1626 (m), 1612 (m), 1566 (w), 1450 (m), 1427 (m), 1339 (m), 1315 (w), 1254 (w), 1202 (m), 1180 (m), 1113 (m), 1057 (w), 1028 (w), 922 (w), 895 (w), 866 (m), 845 (w), 791 (w), 762 (m), 708 (s), 689 (s), 669 (m), 627 (w). Anal. calcd. for  $\text{C}_{23}\text{H}_{18}\text{N}_2\text{O}_3$  (370.4): C 74.58, H 4.90, N 7.56; Found: C 74.67, H 5.07, N 7.79.

### 3.3 (5-Benzoyl-5-hydroxy-3-phenyl-4,5-dihydro-1H-pyrazol-1-yl)(4-tolyl)methanone (5c)

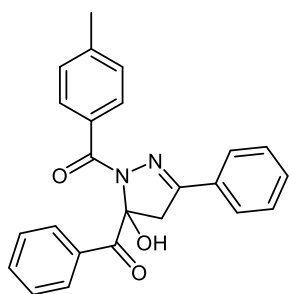

According to the GP and chromatography on silica gel (petroleum ether/ethyl acetate 5:1) compound **5c** (209 mg, 55%) was obtained as light yellow solid, Mp 147 °C;  $R_f$  (petroleum ether/ethyl acetate 5:1): 0.17.  $^1\text{H}$  NMR ( $\text{CDCl}_3$ , 300 MHz):  $\delta$  2.41 (s, 3 H), 3.52 (d,  $J$  = 18.5 Hz, 1 H), 3.74 (d,  $J$  = 18.5 Hz, 1 H), 5.82 (br, 1 H), 7.25 (d,  $J$  = 8.4 Hz, 2 H), 7.36-7.50 (m, 5 H), 7.51-7.61 (m, 1 H), 7.70-7.84 (m, 2 H), 7.88-8.00 (m, 4 H).  $^{13}\text{C}$  NMR ( $\text{CDCl}_3$ , 75 MHz):  $\delta$  21.7 ( $\text{CH}_3$ ), 45.6 ( $\text{CH}_2$ ), 92.4 ( $\text{C}_{\text{quat}}$ ), 127.0 (CH), 128.6 (CH), 129.0 (CH)\*, 129.2 (CH), 130.1 ( $\text{C}_{\text{quat}}$ ), 130.5 (CH), 130.9 (CH), 131.0 ( $\text{C}_{\text{quat}}$ ), 132.1 ( $\text{C}_{\text{quat}}$ ), 134.0 (CH), 142.4 ( $\text{C}_{\text{quat}}$ ), 153.0 ( $\text{C}_{\text{quat}}$ ), 166.7 ( $\text{C}_{\text{quat}}$ ), 193.7 ( $\text{C}_{\text{quat}}$ ); \*broadened signal. MS (EI),  $m/z$ : 366 ( $(\text{M} - \text{H}_2\text{O})^+$ , 7), 279 ( $(\text{M} - \text{C}_7\text{H}_5\text{O})^+$ , 44), 248 ( $(\text{M} - \text{C}_7\text{H}_7\text{O} - \text{H}_2\text{O})^+$ , 7), 119 ( $\text{C}_8\text{H}_7\text{O}^+$ , 100), 105 ( $\text{C}_7\text{H}_5\text{O}^+$ , 9), 91 (21), 77 ( $\text{C}_6\text{H}_5^+$ , 7). IR (ATR),  $\tilde{\nu}$  [ $\text{cm}^{-1}$ ]: 3387 (w), 3362 (w), 1701 (s), 1632 (m), 1607 (m), 1597 (m), 1558 (w), 1512 (w), 1449 (m), 1422 (s), 1404 (m), 1358 (m), 1337 (s), 1273 (w), 1256 (w), 1204 (s), 1182 (s), 1111 (s), 1061 (m), 1026 (w), 1001 (w), 920 (m), 899 (w), 847 (w), 827 (w), 785 (m), 760 (m), 743 (s), 706 (s), 689 (s), 675 (m), 646 (w). Anal. calcd. for  $\text{C}_{24}\text{H}_{20}\text{N}_2\text{O}_3$  (384.4): C 74.98, H 5.24, N 7.29; Found: C 75.19, H 5.42, N 7.26.

### 3.4 (5-Benzoyl-5-hydroxy-3-phenyl-4,5-dihydro-1H-pyrazol-1-yl)(4-bromophenyl)methanone (5d)

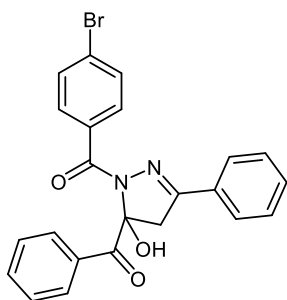

According to the GP and chromatography on silica gel (petroleum ether/ethyl acetate 5:1) compound **5d** (185 mg, 41%) was obtained as beige solid, Mp 164 °C;  $R_f$  (petroleum ether/ethyl acetate 5:1): 0.19.  $^1\text{H}$  NMR ( $\text{CDCl}_3$ , 300 MHz):  $\delta$  3.54 (d,  $J$  = 18.5 Hz, 1 H), 3.75 (d,  $J$  = 18.5 Hz, 1 H), 4.7-6.4 (br, 1 H), 7.38-7.51 (m, 5 H), 7.53-7.61 (m, 3 H), 7.71-7.79 (m, 2 H), 7.84-7.97 (m, 4 H).  $^{13}\text{C}$  NMR ( $\text{CDCl}_3$ , 75 MHz):  $\delta$  46.0 ( $\text{CH}_2$ ), 92.6 ( $\text{C}_{\text{quat}}$ ), 127.0 ( $\text{C}_{\text{quat}}$ ), 127.3 (CH), 129.30 (CH), 129.32 (CH), 129.4 (CH), 130.9 ( $\text{C}_{\text{quat}}$ ), 131.4 (CH), 131.5 (CH), 132.06 ( $\text{C}_{\text{quat}}$ ), 132.10 ( $\text{C}_{\text{quat}}$ ), 132.2 (CH), 134.5 (CH), 153.9 ( $\text{C}_{\text{quat}}$ ), 166.0 ( $\text{C}_{\text{quat}}$ ), 193.7 ( $\text{C}_{\text{quat}}$ ). MS (EI),  $m/z$ : 432 ( $^{81}\text{Br-M} - \text{H}_2\text{O})^+$ , 0.5), 430 ( $^{79}\text{Br-M} - \text{H}_2\text{O})^+$ , 0.6), 345 ( $^{81}\text{Br-M} - \text{C}_7\text{H}_5\text{O})^+$ , 25), 343 ( $^{79}\text{Br-M} - \text{C}_7\text{H}_5\text{O})^+$ , 25), 303 (15), 301 (15), 249 (18), 248 ( $(\text{M} - \text{C}_7\text{H}_4\text{BrO} - \text{H}_2\text{O} + \text{H})^+$ , 100), 247 (10), 185 (51), 183 (53), 171 (53), 157 ( $\text{C}_6\text{H}_4^{81}\text{Br}^+$ , 10), 155 ( $\text{C}_6\text{H}_4^{79}\text{Br}^+$ , 11), 105 ( $\text{C}_7\text{H}_5\text{O}^+$ , 42), 77 ( $\text{C}_6\text{H}_5^+$ , 32). IR (ATR),  $\tilde{\nu}$  [ $\text{cm}^{-1}$ ]: 3302 (w), 1705 (m), 1612 (m), 1585 (w), 1557 (w), 1439 (m), 1342 (m), 1256 (m), 1200 (w), 1182 (w), 1134 (w), 1109 (m), 1070 (w), 1036 (w), 1007 (m), 980 (w), 934 (w), 891 (w), 849 (w), 829 (m), 781 (w), 752 (m), 714 (m), 687 (s), 665 (s), 640 (m), 621 (m). Anal. calcd. for  $\text{C}_{23}\text{H}_{17}\text{BrN}_2\text{O}_3$  (449.3): C 61.48, H 3.81, N 6.23; Found: C 61.25, H 4.00, N 6.08.

### 3.5 (5-Benzoyl-5-hydroxy-3-phenyl-4,5-dihydro-1H-pyrazol-1-yl)(thien-2-yl)methanone (5e)

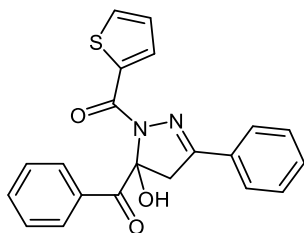

According to the GP and chromatography on silica gel (petroleum ether/ethyl acetate 5:1) compound **5e** (268 mg, 71%) was obtained as light yellow solid, Mp 162 °C;  $R_f$  (petroleum ether/ethyl acetate 5:1): 0.16.  $^1\text{H}$  NMR ( $\text{CDCl}_3$ , 300 MHz):  $\delta$  3.54 (d,  $J$  = 18.4 Hz, 1 H), 3.77 (d,  $J$  = 18.5 Hz, 1 H), 5.60-6.15 (br, 1 H), 7.13 (dd,  $J$  = 5.0 Hz,  $J$  = 3.8 Hz, 1 H), 7.40 (t,  $J$  = 7.7 Hz, 2 H), 7.48-7.62 (m, 4 H), 7.67 (dd,  $J$  = 4.9 Hz,  $J$  = 1.3 Hz, 1 H), 7.83-8.00 (m, 4 H), 8.15 (dd,  $J$  = 3.9 Hz,  $J$  = 1.4 Hz, 1 H).  $^{13}\text{C}$  NMR ( $\text{CDCl}_3$ , 75 MHz):  $\delta$  46.0 ( $\text{CH}_2$ ), 91.9 ( $\text{C}_{\text{quat}}$ ), 127.1 (CH), 127.2 (CH), 129.12 (CH), 129.14 (CH), 129.2 (CH), 130.8 ( $\text{C}_{\text{quat}}$ ), 131.2 (CH), 131.7 ( $\text{C}_{\text{quat}}$ ), 133.8 ( $\text{C}_{\text{quat}}$ ), 134.2 (CH), 134.5 (CH), 135.8 (CH), 153.2 ( $\text{C}_{\text{quat}}$ ), 159.7 ( $\text{C}_{\text{quat}}$ ), 193.3 ( $\text{C}_{\text{quat}}$ ). MS (EI),  $m/z$ : 358 ( $(\text{M} - \text{H}_2\text{O})^+$ , 1), 272 (12), 271 ( $(\text{M} - \text{C}_7\text{H}_5\text{O})^+$ , 71), 111 ( $\text{C}_5\text{H}_3\text{OS}^+$ , 100), 105 ( $\text{C}_7\text{H}_5\text{O}^+$ , 6), 77 ( $\text{C}_6\text{H}_5^+$ , 8). IR (ATR),  $\tilde{\nu}$  [ $\text{cm}^{-1}$ ]: 3316 (w), 2922 (m), 1695 (m), 1609 (m), 1595 (m), 1512 (m), 1437 (s), 1410 (m), 1327 (m), 1304 (w), 1275 (w), 1252 (w), 1206 (s), 1186 (m), 1115 (s), 1059 (w), 1043 (m), 937 (w), 920 (m), 901 (w), 858 (m), 826 (m), 762 (m), 729 (s), 704 (s), 689 (s), 677 (m), 623 (w). Anal. calcd. for  $\text{C}_{21}\text{H}_{16}\text{N}_2\text{O}_3\text{S}$  (376.4): C 67.00, H 4.28, N 7.44; Found: C 67.21, H 4.45, N 7.19.

### 3.6 (5-Benzoyl-5-hydroxy-3-phenyl-4,5-dihydro-1H-pyrazol-1-yl)(furan-2-yl)methanone (5f)

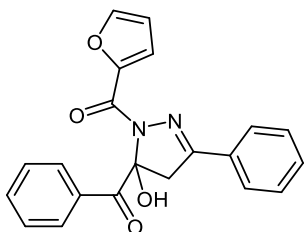

According to the GP and chromatography on silica gel (petroleum ether/ethyl acetate 4:1) compound **5f** (241 mg, 67%) was obtained as beige solid, Mp 183 °C;  $R_f$  (petroleum ether/ethyl acetate 4:1): 0.22.  $^1\text{H}$  NMR ( $\text{CDCl}_3$ , 300 MHz):  $\delta$  3.51 (d,  $J$  = 18.5 Hz, 1 H), 3.74 (d,  $J$  = 18.5 Hz, 1 H), 5.78 (br, 1 H), 6.58 (dd,  $J$  = 3.5 Hz,  $J$  = 1.7 Hz, 1 H), 7.34-7.44 (m, 2 H), 7.45-7.59 (m, 4 H), 7.59-7.65 (m, 1 H), 7.74-7.79 (m, 1 H), 7.80-7.86 (m, 2 H), 7.86-7.94 (m, 2 H).  $^{13}\text{C}$  NMR ( $\text{CDCl}_3$ , 75 MHz):  $\delta$  45.9 ( $\text{CH}_2$ ), 92.4 ( $\text{C}_{\text{quat}}$ ), 112.2 (CH), 120.9 (CH), 127.3 (CH), 129.3 (CH), 129.4 (CH), 129.5 (CH), 131.1 ( $\text{C}_{\text{quat}}$ ), 131.4 (CH), 132.1 ( $\text{C}_{\text{quat}}$ ), 134.4 (CH), 145.6 ( $\text{C}_{\text{quat}}$ ), 146.7 (CH), 154.0 ( $\text{C}_{\text{quat}}$ ), 156.5 ( $\text{C}_{\text{quat}}$ ), 193.5 ( $\text{C}_{\text{quat}}$ ). MS (EI),  $m/z$ : 342 ( $(\text{M} - \text{H}_2\text{O})^+$ , 2), 256 ( $(\text{M} - \text{C}_5\text{H}_3\text{O}_2)^+$ , 16), 255 ( $(\text{M} - \text{C}_7\text{H}_5\text{O})^+$ , 100), 105 ( $\text{C}_7\text{H}_5\text{O}^+$ , 8), 95 (85), 77 ( $\text{C}_6\text{H}_5^+$ , 11). IR (ATR),  $\tilde{\nu}$  [ $\text{cm}^{-1}$ ]: 1678 (m), 1603 (s), 1551 (m), 1466 (s), 1441 (s), 1339 (m), 1240 (m), 1223 (m), 1209 (m), 1018 (w), 928 (m), 851 (m), 816 (m), 795 (m), 768 (s), 748 (m), 710 (s), 692 (s), 667 (m), 633 (m). Anal. calcd. for  $\text{C}_{21}\text{H}_{16}\text{N}_2\text{O}_4$  (360.4): C 69.99, H 4.48, N 7.77; Found: C 70.12, H 4.18, N 7.75.

### 3.7 1-(5-Benzoyl-5-hydroxy-3-phenyl-4,5-dihydro-1*H*-pyrazol-1-yl)-2-phenylethan-1-one (5g)

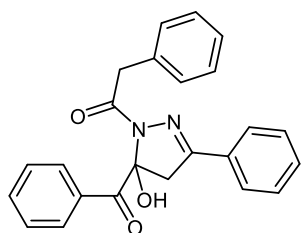

According to the GP and chromatography on silica gel (petroleum ether/ethyl acetate 5:1) compound **5g** (228 mg, 59%) was obtained as beige solid, Mp 110 °C;  $R_f$  (petroleum ether/ethyl acetate 5:1): 0.15.  $^1\text{H}$  NMR ( $\text{CDCl}_3$ , 300 MHz):  $\delta$  3.37 (d,  $J = 18.5$  Hz, 1 H), 3.58 (d,  $J = 18.5$  Hz, 1 H), 3.87 (d,  $J = 14.0$  Hz, 1 H), 4.09 (d,  $J = 14.0$  Hz, 1 H), 5.61 (br, 1 H), 7.09-7.21 (m, 7 H), 7.35-7.45 (m, 4 H), 7.54-7.62 (m, 2 H), 7.67-7.76 (m, 2 H).  $^{13}\text{C}$  NMR ( $\text{CDCl}_3$ , 75 MHz):  $\delta$  41.5 ( $\text{CH}_2$ ), 46.9 ( $\text{CH}_2$ ), 91.0 ( $\text{C}_{\text{quat}}$ ), 127.15 (CH), 127.17 (CH), 128.8 (CH), 129.1 (CH), 129.26 (CH), 129.30 (CH), 129.8 (CH), 131.16 ( $\text{C}_{\text{quat}}$ ), 131.22 (CH), 131.7 ( $\text{C}_{\text{quat}}$ ), 134.2 (CH), 134.3 ( $\text{C}_{\text{quat}}$ ), 152.8 ( $\text{C}_{\text{quat}}$ ), 169.9 ( $\text{C}_{\text{quat}}$ ), 193.7 ( $\text{C}_{\text{quat}}$ ). MS (EI),  $m/z$  366 ( $(\text{M} - \text{H}_2\text{O})^+$ , 1.2), 279 ( $(\text{M} - \text{C}_7\text{H}_5\text{O})^+$ , 41), 162 (11), 161 ( $(\text{M} - \text{C}_7\text{H}_5\text{O} - \text{C}_8\text{H}_7\text{O} + \text{H})^+$ , 100), 105 ( $\text{C}_7\text{H}_5\text{O}^+$ , 8), 91 ( $\text{C}_7\text{H}_7^+$ , 18), 77 ( $\text{C}_6\text{H}_5^+$ , 10). IR (ATR),  $\tilde{\nu}$  [ $\text{cm}^{-1}$ ]: 3406 (w), 2924 (w), 1692 (m), 1657 (s), 1593 (w), 1493 (w), 1427 (s), 1339 (m), 1323 (w), 1267 (w), 1238 (w), 1198 (m), 1179 (m), 1163 (m), 1111 (m), 1076 (w), 1049 (m), 1020 (w), 999 (w), 968 (w), 926 (w), 916 (w), 889 (w), 866 (w), 766 (s), 716 (s), 691 (s), 675 (m), 631 (w), 606 (w). Anal. calcd. for  $\text{C}_{24}\text{H}_{20}\text{N}_2\text{O}_3$  (384.4): C 74.98, H 5.24, N 7.29; Found: C 74.87, H 5.48, N 7.11.

### 3.8 1-(5-Benzoyl-5-hydroxy-3-phenyl-4,5-dihydro-1*H*-pyrazol-1-yl)-2-methylpropan-1-one (5h)

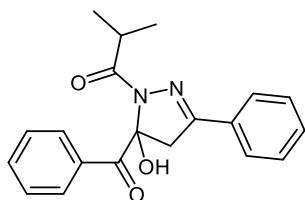

According to the GP and chromatography on silica gel (petroleum ether/ethyl acetate 6:1) compound **5h** (222 mg, 66%) was obtained as beige solid, Mp 87-89 °C;  $R_f$  (petroleum ether/ethyl acetate 6:1): 0.19.  $^1\text{H}$  NMR ( $\text{CDCl}_3$ , 300 MHz):  $\delta$  1.05 (d,  $J = 7.0$  Hz, 3 H), 1.17 (d,  $J = 6.9$  Hz, 3 H), 3.42 (sept,  $J = 7.0$  Hz, 1 H), 3.46 (d,  $J = 18.5$  Hz, 1 H), 3.71 (d,  $J = 18.5$  Hz, 1 H), 5.68 (br, 1 H), 7.35-7.50 (m, 5 H), 7.53-7.60 (tt,  $J = 7.4$  Hz,  $J = 1.5$  Hz, 1 H), 7.75-7.89 (m, 4 H).  $^{13}\text{C}$  NMR ( $\text{CDCl}_3$ , 75 MHz):  $\delta$  18.1 ( $\text{CH}_3$ ), 18.5 ( $\text{CH}_3$ ), 32.0 (CH), 46.4 ( $\text{CH}_2$ ), 90.9 ( $\text{C}_{\text{quat}}$ ), 126.9 (CH), 128.9 (CH), 129.0 (CH), 129.2 (CH), 130.9 (CH), 131.1 ( $\text{C}_{\text{quat}}$ ), 131.7 ( $\text{C}_{\text{quat}}$ ), 134.1 (CH), 152.2 ( $\text{C}_{\text{quat}}$ ), 176.0 ( $\text{C}_{\text{quat}}$ ), 193.7 ( $\text{C}_{\text{quat}}$ ). MS (EI),  $m/z$  318 ( $(\text{M} - \text{H}_2\text{O})^+$ , 0.3), 248 ( $(\text{M} - \text{C}_4\text{H}_7\text{O} - \text{H}_2\text{O} + \text{H})^+$ , 4), 231 ( $(\text{M} - \text{C}_7\text{H}_5\text{O})^+$ , 39), 162 (11), 161 ( $(\text{M} - \text{C}_4\text{H}_7\text{O} - \text{C}_7\text{H}_5\text{O} + \text{H})^+$ , 100), 105 ( $\text{C}_7\text{H}_5\text{O}^+$ , 11), 77 ( $\text{C}_6\text{H}_5^+$ , 11), 71 ( $\text{C}_4\text{H}_7\text{O}^+$ , 4). IR (ATR),  $\tilde{\nu}$  [ $\text{cm}^{-1}$ ]: 3402 (w), 2972 (w), 2924 (w), 2855 (w), 1738 (w), 1695 (s), 1657 (s), 1595 (w), 1468 (m), 1447 (m), 1423 (s), 1342 (m), 1281 (m), 1267 (m), 1223 (m), 1194 (s), 1180 (s), 1092 (m), 1043 (m), 1018 (m), 947 (m), 910 (m), 866 (m), 843 (m), 770 (s), 708 (s), 691 (s), 677 (s). Anal. calcd. for  $\text{C}_{20}\text{H}_{20}\text{N}_2\text{O}_3$  (336.4): C 71.41, H 5.99, N 8.33; Found: C 71.61, H 6.17, N 8.09.

### 3.9 (5-Benzoyl-5-hydroxy-3-phenyl-4,5-dihydro-1H-pyrazol-1-yl)(cyclopropyl)-methanone (**5i**)

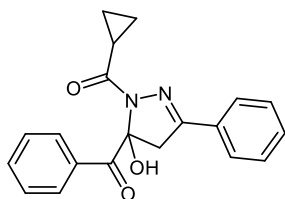

According to the GP and chromatography on silica gel (petroleum ether/ethyl acetate 6:1) compound **5i** (232 mg, 69%) was obtained as colorless solid, Mp 84 °C;  $R_f$  (petroleum ether/ethyl acetate 6:1): 0.15.  $^1\text{H}$  NMR ( $\text{CDCl}_3$ , 300 MHz):  $\delta$  0.65-1.10 (m, 4 H), 2.55-2.70 (m, 1 H), 3.39 (d,  $J$  = 18.5 Hz, 1 H), 3.64 (d,  $J$  = 18.5 Hz, 1 H), 5.50 (br, 1 H), 7.28-7.44 (m, 5 H), 7.44-7.54 (m, 1 H), 7.67-7.76 (m, 2 H), 7.76-7.84 (m, 2 H).  $^{13}\text{C}$  NMR ( $\text{CDCl}_3$ , 75 MHz):  $\delta$  8.7 ( $\text{CH}_2$ ), 8.9 ( $\text{CH}_2$ ), 11.9 (CH), 46.3 ( $\text{CH}_2$ ), 90.7 ( $\text{C}_{\text{quat}}$ ), 126.7 (CH), 128.79 (CH), 128.83 (CH), 129.0 (CH), 130.7 (CH), 130.9 ( $\text{C}_{\text{quat}}$ ), 131.7 ( $\text{C}_{\text{quat}}$ ), 133.9 (CH), 152.3 ( $\text{C}_{\text{quat}}$ ), 172.8 ( $\text{C}_{\text{quat}}$ ), 193.5 ( $\text{C}_{\text{quat}}$ ). MS (EI),  $m/z$  316 ( $(\text{M} - \text{H}_2\text{O})^+$ , 0.8), 248 ( $(\text{M} - \text{C}_4\text{H}_5\text{O} - \text{H}_2\text{O} + \text{H})^+$ , 8), 229 ( $(\text{M} - \text{C}_7\text{H}_5\text{O})^+$ , 65), 162 (11), 161 ( $(\text{M} - \text{C}_4\text{H}_5\text{O} - \text{C}_7\text{H}_5\text{O} + \text{H})^+$ , 100), 105 ( $\text{C}_7\text{H}_5\text{O}^+$ , 11), 77 ( $\text{C}_6\text{H}_5^+$ , 13), 69 ( $\text{C}_4\text{H}_5\text{O}^+$ , 19). IR (ATR),  $\tilde{\nu}$  [ $\text{cm}^{-1}$ ]: 3393 (w), 1695 (m), 1645 (m), 1597 (w), 1429 (s), 1360 (m), 1285 (m), 1240 (m), 1200 (m), 1182 (m), 1103 (m), 1049 (m), 1018 (w), 953 (m), 916 (m), 887 (w), 866 (m), 787 (w), 760 (m), 733 (w), 706 (s), 691 (s), 675 (m), 604 (w). Anal. calcd. for  $\text{C}_{20}\text{H}_{18}\text{N}_2\text{O}_3$  (334.4): C 71.84, H 5.43, N 8.38; Found: C 72.07, H 5.62, N 8.16.

### 3.10 1-(5-Benzoyl-5-hydroxy-3-phenyl-4,5-dihydro-1H-pyrazol-1-yl)-2,2-dimethylpropan-1-one (**5j**)

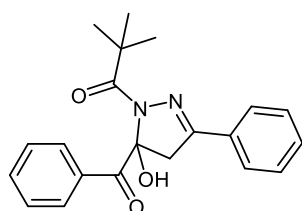

According to the GP and chromatography on silica gel (petroleum ether/ethyl acetate 4:1) compound **5j** (203 mg, 58%) was obtained as beige solid, Mp 133 °C;  $R_f$  (petroleum ether/ethyl acetate 4:1): 0.47.  $^1\text{H}$  NMR ( $\text{CDCl}_3$ , 300 MHz):  $\delta$  1.34 (s, 9 H), 3.37 (d,  $J$  = 18.5 Hz, 1 H), 3.60 (d,  $J$  = 18.5 Hz, 1 H), 5.65 (s, 1 H), 7.35-7.60 (m, 6 H), 7.74-7.88 (m, 4 H).  $^{13}\text{C}$  NMR ( $\text{CDCl}_3$ , 75 MHz):  $\delta$  26.8 ( $\text{CH}_3$ ), 40.0 ( $\text{CH}_2$ ), 45.1 ( $\text{C}_{\text{quat}}$ ), 92.5 ( $\text{C}_{\text{quat}}$ ), 127.1 (CH), 129.1 (CH), 129.3 (CH), 129.4 (CH), 131.0 (CH), 131.5 ( $\text{C}_{\text{quat}}$ ), 132.1 ( $\text{C}_{\text{quat}}$ ), 134.2 (CH), 151.7 ( $\text{C}_{\text{quat}}$ ), 176.7 ( $\text{C}_{\text{quat}}$ ), 194.0 ( $\text{C}_{\text{quat}}$ ). MS (EI),  $m/z$  332 ( $(\text{M} - \text{H}_2\text{O})^+$ , 0.4), 245 ( $(\text{M} - \text{C}_7\text{H}_5\text{O})^+$ , 18), 238 (19), 161 (26), 105 ( $\text{C}_7\text{H}_5\text{O}^+$ , 100), 77 ( $\text{C}_6\text{H}_5^+$ , 21), 57 ( $\text{C}_4\text{H}_9^+$ , 14). IR (ATR),  $\tilde{\nu}$  [ $\text{cm}^{-1}$ ]: 2922 (w), 1732 (w), 1686 (s), 1645 (s), 1597 (w), 1485 (w), 1447 (m), 1408 (s), 1366 (m), 1323 (m), 1306 (w), 1265 (m), 1248 (m), 1223 (m), 1198 (m), 1184 (s), 1159 (m), 1130 (w), 1101 (m), 1065 (w), 1047 (m), 1032 (m), 1022 (m), 1001 (w), 947 (m), 926 (w), 899 (m), 881 (m), 866 (w), 806 (w), 787 (m), 766 (s), 746 (w), 708 (s), 692 (s), 677 (m), 638 (m). Anal. calcd. for  $\text{C}_{21}\text{H}_{22}\text{N}_2\text{O}_3$  (350.4): C 71.98, H 6.33, N 7.99; Found: C 71.75, H 6.06, N 7.76.

### 3.11 1-(5-Benzoyl-5-hydroxy-3-phenyl-4,5-dihydro-1H-pyrazol-1-yl)butan-1-one (5k)

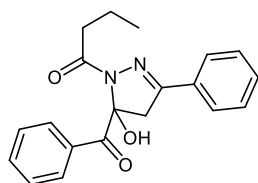

According to the GP and chromatography on silica gel (petroleum ether/ethyl acetate 7:1) compound **5k** (111 mg, 33%) was obtained as light orange solid, Mp 100 °C;  $R_f$  (petroleum ether/ethyl acetate 7:1): 0.15.  $^1\text{H}$  NMR ( $\text{CDCl}_3$ , 300 MHz):  $\delta$  0.89 (t,  $J$  = 7.4 Hz, 3 H), 1.56-1.72 (m, 2 H), 2.69-2.77 (m, 2 H), 3.46 (d,  $J$  = 18.5 Hz, 1 H), 3.71 (d,  $J$  = 18.5 Hz, 1 H), 5.30-6.00 (br, 1 H), 7.36-7.50 (m, 5 H), 7.52-7.61 (m, 1 H), 7.75-7.81 (m, 2 H), 7.82-7.88 (m, 2 H).  $^{13}\text{C}$  NMR ( $\text{CDCl}_3$ , 75 MHz):  $\delta$  14.1 ( $\text{CH}_3$ ), 18.2 ( $\text{CH}_2$ ), 36.3 ( $\text{CH}_2$ ), 46.8 ( $\text{CH}_2$ ), 91.1 ( $\text{C}_{\text{quat}}$ ), 127.1 (CH), 129.18 (CH), 129.24 (CH), 129.4 (CH), 131.1 (CH), 131.3 ( $\text{C}_{\text{quat}}$ ), 132.0 ( $\text{C}_{\text{quat}}$ ), 134.3 (CH), 152.4 ( $\text{C}_{\text{quat}}$ ), 172.6 ( $\text{C}_{\text{quat}}$ ), 194.0 ( $\text{C}_{\text{quat}}$ ). MS (EI),  $m/z$ : 318 ( $(\text{M} - \text{H}_2\text{O})^+$ , 0.2), 248 ( $(\text{M} - \text{C}_4\text{H}_7\text{O} - \text{H}_2\text{O} + \text{H})^+$ , 4), 231 ( $(\text{M} - \text{C}_7\text{H}_5\text{O})^+$ , 36), 162 (11), 161 (100), 105 ( $\text{C}_7\text{H}_5\text{O}^+$ , 6), 77 ( $\text{C}_6\text{H}_5^+$ , 9). IR (ATR),  $\tilde{\nu}$  [ $\text{cm}^{-1}$ ]: 1686 (s), 1668 (s), 1595 (w), 1580 (w), 1447 (m), 1423 (s), 1402 (m), 1362 (w), 1329 (w), 1308 (w), 1271 (m), 1260 (m), 1236 (m), 1200 (m), 1184 (m), 1169 (w), 1099 (m), 1047 (m), 1018 (w), 1001 (w), 957 (w), 918 (w), 895 (w), 881 (s), 868 (w), 760 (s), 708 (s), 691 (s), 677 (w), 611 (w). Anal. calcd. for  $\text{C}_{20}\text{H}_{20}\text{N}_2\text{O}_3$  (336.4): C 71.41, H 5.99, N 8.33; Found: C 71.42, H 5.82, N 8.28.

### 3.12 (5-Hydroxy-3-(4-methoxyphenyl)-4,5-dihydro-1H-pyrazol-1,5-diyl)bis(phenylmethanone) (5l)

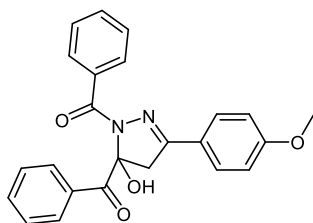

According to the GP and chromatography on silica gel (petroleum ether/ethyl acetate 5:1) compound **5l** (220 mg, 55%) was obtained as beige solid, Mp 48-50 °C;  $R_f$  (petroleum ether/ethyl acetate 5:1): 0.13.  $^1\text{H}$  NMR ( $\text{CDCl}_3$ , 300 MHz):  $\delta$  3.50 (d,  $J$  = 18.4 Hz, 1 H), 3.72 (d,  $J$  = 18.4 Hz, 1 H), 3.86 (s, 3 H), 4.60-6.50 (br, 1 H), 6.91-7.02 (m, 2 H), 7.36-7.60 (m, 6 H), 7.66-7.76 (m, 2 H), 7.90-8.04 (m, 4 H).  $^{13}\text{C}$  NMR ( $\text{CDCl}_3$ , 75 MHz):  $\delta$  46.0 ( $\text{CH}_2$ ), 55.8 ( $\text{CH}_3$ ), 92.5 ( $\text{C}_{\text{quat}}$ ), 114.7 (CH), 123.7 ( $\text{C}_{\text{quat}}$ ), 128.1 (CH), 128.9 (CH), 129.2 (CH), 129.4 (CH), 130.6 (CH), 132.0 (CH), 132.3 ( $\text{C}_{\text{quat}}$ ), 133.4 ( $\text{C}_{\text{quat}}$ ), 134.3 (CH), 153.3 ( $\text{C}_{\text{quat}}$ ), 162.1 ( $\text{C}_{\text{quat}}$ ), 166.9 ( $\text{C}_{\text{quat}}$ ), 194.0 ( $\text{C}_{\text{quat}}$ ). MS (EI),  $m/z$ : 382 ( $(\text{M} - \text{H}_2\text{O})^+$ , 2), 296 (12), 295 ( $(\text{M} - \text{C}_7\text{H}_5\text{O})^+$ , 65), 279 (10), 278 (51), 223 (16), 149 (17), 106 (10), 105 ( $\text{C}_7\text{H}_5\text{O}^+$ , 100), 77 ( $\text{C}_6\text{H}_5^+$ , 29), 43 (18). IR (ATR),  $\tilde{\nu}$  [ $\text{cm}^{-1}$ ]: 2926 (w), 1690 (w), 1636 (m), 1605 (m), 1576 (w), 1518 (w), 1493 (w), 1449 (m), 1427 (m), 1410 (m), 1331 (m), 1308 (m), 1252 (s), 1200 (m), 1177 (s), 1103 (m), 1059 (w), 1018 (m), 930 (w), 893 (w), 868 (m), 831 (m), 795 (m), 700 (s), 671 (m), 662 (w). Anal. calcd. for  $\text{C}_{24}\text{H}_{20}\text{N}_2\text{O}_4$  (400.4): C 71.99, H 5.03, N 7.00; Found: C 71.88, H 5.31, N 6.71.



### 3.13 (3-(4-(*tert*-Butyl)phenyl)-5-hydroxy-4,5-dihydro-1*H*-pyrazol-1,5-diyl)bis(phenylmethanone) (**5m**)

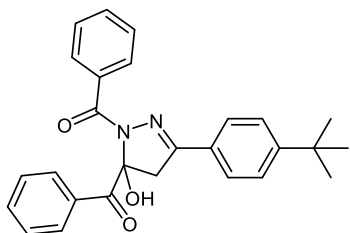

According to the GP and chromatography on silica gel (petroleum ether/ethyl acetate 7:1) compound **5m** (293 mg, 69%) was obtained as beige solid, Mp 64-68 °C;  $R_f$  (petroleum ether/ethyl acetate 7:1): 0.18.  $^1\text{H}$  NMR ( $\text{CDCl}_3$ , 300 MHz):  $\delta$  1.35 (s, 9 H), 3.52 (d,  $J = 18.5$  Hz, 1 H), 3.75 (d,  $J = 18.5$  Hz, 1 H), 4.70-6.30 (br, 1 H), 7.36-7.59 (m, 8 H), 7.71 (dt,  $J = 8.7$  Hz,  $J = 2.0$  Hz, 2 H), 7.90-8.03 (m, 4 H).  $^{13}\text{C}$  NMR ( $\text{CDCl}_3$ , 75 MHz):  $\delta$  31.5 ( $\text{CH}_3$ ), 35.4 ( $\text{C}_{\text{quat}}$ ), 46.0 ( $\text{CH}_2$ ), 92.5 ( $\text{C}_{\text{quat}}$ ), 126.2 (CH), 127.1 (CH), 128.1 (CH), 128.3 ( $\text{C}_{\text{quat}}$ ), 129.2 (CH), 129.4 (CH), 130.6 (CH), 132.0 (CH), 132.2 ( $\text{C}_{\text{quat}}$ ), 133.3 ( $\text{C}_{\text{quat}}$ ), 134.3 (CH), 153.5 ( $\text{C}_{\text{quat}}$ ), 154.9 ( $\text{C}_{\text{quat}}$ ), 166.9 ( $\text{C}_{\text{quat}}$ ), 193.9 ( $\text{C}_{\text{quat}}$ ). MS (EI),  $m/z$  408 ( $(\text{M} - \text{H}_2\text{O})^+$ , 2), 393 ( $(\text{M} - \text{H}_2\text{O} - \text{CH}_3)^+$ , 2), 322 (15), 321 ( $(\text{M} - \text{C}_7\text{H}_5\text{O} + \text{H})^+$ , 63), 304 ( $(\text{M} - \text{C}_7\text{H}_5\text{O} - \text{H}_2\text{O} + \text{H})^+$ , 13), 289 (33), 106 (11), 105 ( $\text{C}_7\text{H}_5\text{O}^+$ , 100), 77 ( $\text{C}_6\text{H}_5^+$ , 22), 43 (15). IR (ATR),  $\tilde{\nu}$  [ $\text{cm}^{-1}$ ]: 2961 (w), 1690 (m), 1636 (m), 1599 (w), 1576 (w), 1449 (m), 1423 (s), 1406 (m), 1362 (w), 1329 (m), 1308 (w), 1269 (m), 1246 (w), 1202 (m), 1182 (m), 1101 (m), 1057 (w), 1028 (w), 937 (w), 895 (w), 870 (m), 835 (m), 789 (w), 708 (s), 693 (s), 671 (m), 652 (w). Anal. calcd. for  $\text{C}_{27}\text{H}_{26}\text{N}_2\text{O}_3$  (426.5): C 76.03, H 6.14, N 6.57; Found: C 76.13, H 6.39, N 6.32.

### 3.14 (3-(4-Fluorophenyl)-5-hydroxy-4,5-dihydro-1*H*-pyrazol-1,5-diyl)bis(phenylmethanone) (**5n**)

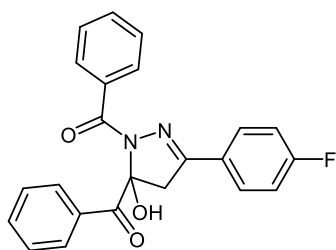

According to the GP and chromatography on silica gel (petroleum ether/ethyl acetate 5:1) compound **5n** (256 mg, 66%) was obtained as beige solid, Mp 162 °C;  $R_f$  (petroleum ether/ethyl acetate 5:1): 0.15.  $^1\text{H}$  NMR ( $\text{CDCl}_3$ , 300 MHz):  $\delta$  3.50 (d,  $J = 18.4$  Hz, 1 H), 3.73 (d,  $J = 18.4$  Hz, 1 H), 5.84 (br, 1 H), 7.08-7.19 (m, 2 H), 7.37-7.48 (m, 4 H), 7.48-7.62 (m, 2 H), 7.70-7.80 (m, 2 H), 7.90-8.01 (m, 4 H).  $^{13}\text{C}$  NMR ( $\text{CDCl}_3$ , 75 MHz):  $\delta$  46.0 ( $\text{CH}_2$ ), 92.7 ( $\text{C}_{\text{quat}}$ ), 116.5 (d,  $J = 22$  Hz, CH), 127.4 (d,  $J = 3$  Hz,  $\text{C}_{\text{quat}}$ ), 128.2 (CH), 129.3 (CH), 129.37 (CH), 129.42 (CH), 130.5 (CH), 132.1 (CH), 132.2 ( $\text{C}_{\text{quat}}$ ), 133.2 ( $\text{C}_{\text{quat}}$ ), 134.4 (CH), 152.4 ( $\text{C}_{\text{quat}}$ ), 164.6 (d,  $J = 252$  Hz,  $\text{C}_{\text{quat}}$ ), 167.1 ( $\text{C}_{\text{quat}}$ ), 193.7 ( $\text{C}_{\text{quat}}$ ). MS (EI),  $m/z$  370 ( $(\text{M} - \text{H}_2\text{O})^+$ , 2), 284 (13), 283 ( $(\text{M} - \text{C}_7\text{H}_5\text{O})^+$ , 73), 105 ( $\text{C}_7\text{H}_5\text{O}^+$ , 100), 77 ( $\text{C}_6\text{H}_5^+$ , 24). IR (ATR),  $\tilde{\nu}$  [ $\text{cm}^{-1}$ ]: 3341 (w), 1697 (m), 1626 (m), 1605 (m), 1578 (w), 1566 (w), 1516 (w), 1495 (w), 1450 (m), 1433 (m), 1410 (m), 1360 (w), 1335 (s), 1315 (w), 1302 (w), 1277 (w), 1258 (w), 1231 (w), 1204 (m), 1180 (m), 1157 (m), 1130 (w), 1115 (m), 1057 (w), 928 (w), 897 (w), 872 (m), 841 (s), 810 (w), 789 (w), 708 (s), 689 (m), 671 (m), 662 (m). Anal. calcd. for  $\text{C}_{23}\text{H}_{17}\text{FN}_2\text{O}_3$  (388.4): C 71.13, H 4.41, N 7.21; Found: C 71.12, H 4.48, N 7.20.

### 3.15 4-(1,5-Dibenzoyl-5-hydroxy-4,5-dihydro-1H-pyrazol-3-yl)benzonitrile (5o)

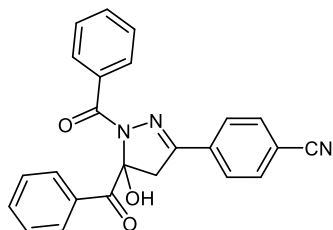

According to the GP and chromatography on silica gel (petroleum ether/ethyl acetate 4:1) compound **5o** (113 mg, 29%) was obtained as colorless solid, Mp 158 °C;  $R_f$  (petroleum ether/ethyl acetate 4:1): 0.28.  $^1\text{H}$  NMR ( $\text{CDCl}_3$ , 300 MHz):  $\delta$  3.53 (d,  $J = 18.5$  Hz, 1 H), 3.73 (d,  $J = 18.5$  Hz, 1 H), 5.99 (br, 1 H), 7.38-7.49 (m, 4 H), 7.51-7.61 (m, 2 H), 7.68-7.75 (m, 2 H), 7.81-7.88 (m, 2 H), 7.89-7.99 (m, 4 H).  $^{13}\text{C}$  NMR ( $\text{CDCl}_3$ , 75 MHz):  $\delta$  45.2 ( $\text{CH}_2$ ), 92.7 ( $\text{C}_{\text{quat}}$ ), 114.0 ( $\text{C}_{\text{quat}}$ ), 118.2 ( $\text{C}_{\text{quat}}$ ), 127.3 (CH), 127.9 (CH), 129.0 (CH), 129.1 (CH), 130.1 (CH), 131.8 ( $\text{C}_{\text{quat}}$ ), 132.0 (CH), 132.5 ( $\text{C}_{\text{quat}}$ ), 132.6 (CH), 134.2 (CH), 134.9 ( $\text{C}_{\text{quat}}$ ), 151.0 ( $\text{C}_{\text{quat}}$ ), 167.0 ( $\text{C}_{\text{quat}}$ ), 193.0 ( $\text{C}_{\text{quat}}$ ). MS (EI),  $m/z$  377 ( $(\text{M} - \text{H}_2\text{O})^+$ , 1), 290 ( $(\text{M} - \text{C}_7\text{H}_5\text{O})^+$ , 32), 274 (13), 273 ( $(\text{M} - \text{C}_7\text{H}_5\text{O} - \text{H}_2\text{O} + \text{H})^+$ , 67), 260 (11), 259 (56), 232 (10), 231 (53), 230 (18), 216 (14), 115 (11), 105 ( $\text{C}_7\text{H}_5\text{O}^+$ , 100), 77 ( $\text{C}_6\text{H}_5^+$ , 38). IR (ATR),  $\tilde{\nu}$  [ $\text{cm}^{-1}$ ]: 3383 (w), 3061 (w), 2226 (w), 1668 (m), 1608 (m), 1591 (w), 1566 (m), 1450 (m), 1431 (m), 1402 (m), 1331 (m), 1317 (m), 1287 (w), 1260 (m), 1227 (m), 1188 (m), 1177 (w), 1159 (w), 1107 (m), 1069 (w), 1016 (w), 932 (w), 893 (w), 849 (m), 835 (m), 791 (w), 721 (m), 704 (s), 673 (s), 652 (m). Anal. calcd. for  $\text{C}_{24}\text{H}_{17}\text{N}_3\text{O}_3$  (395.4): C 72.90, H 4.33, N 10.63; Found: C 72.99, H 4.52, N 10.90.

### 3.16 (1-Benzoyl-5-hydroxy-3-phenyl-4,5-dihydro-1H-pyrazol-5-yl)(mesityl)methanone (5p)

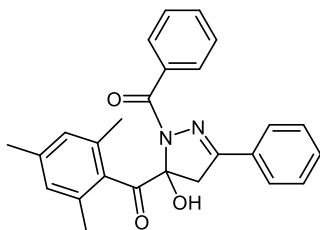

According to the GP and chromatography on silica gel (petroleum ether/ethyl acetate 15:1) compound **5p** (194 mg, 47%) was obtained as colorless solid, Mp 161 °C;  $R_f$  (petroleum ether/ethyl acetate 15:1): 0.23.  $^1\text{H}$  NMR ( $\text{CDCl}_3$ , 300 MHz):  $\delta$  2.32 (s, 3 H), 2.35 (s, 6 H), 3.59 (d,  $J = 17.7$  Hz, 1 H), 3.86 (d,  $J = 17.7$  Hz, 1 H), 5.44 (br, 1 H), 6.91 (s, 2 H), 7.37-7.60 (m, 6 H), 7.68-7.78 (m, 2 H), 8.00-8.10 (m, 2 H).  $^{13}\text{C}$  NMR ( $\text{CDCl}_3$ , 75 MHz):  $\delta$  20.9 ( $\text{CH}_3$ ), 21.5 ( $\text{CH}_3$ ), 46.8 ( $\text{CH}_2$ ), 96.2 ( $\text{C}_{\text{quat}}$ ), 127.2 (CH), 128.2 (CH), 129.1 (CH), 129.3 (CH), 130.7 (CH), 131.0 (CH), 131.1 ( $\text{C}_{\text{quat}}$ ), 132.2 (CH), 133.2 ( $\text{C}_{\text{quat}}$ ), 134.4 ( $\text{C}_{\text{quat}}$ ), 136.9 ( $\text{C}_{\text{quat}}$ ), 140.3 ( $\text{C}_{\text{quat}}$ ), 153.7 ( $\text{C}_{\text{quat}}$ ), 168.3 ( $\text{C}_{\text{quat}}$ ), 208.1 ( $\text{C}_{\text{quat}}$ ). MS (EI),  $m/z$  394 ( $(\text{M} - \text{H}_2\text{O})^+$ , 4), 266 (17), 265 ( $(\text{M} - \text{C}_{10}\text{H}_{11}\text{O})^+$ , 91), 147 ( $\text{C}_{10}\text{H}_{11}\text{O}^+$ , 17), 105 ( $\text{C}_7\text{H}_5\text{O}^+$ , 100), 77 ( $\text{C}_6\text{H}_5^+$ , 18). IR (ATR),  $\tilde{\nu}$  [ $\text{cm}^{-1}$ ]: 3319 (w), 1688 (m), 1616 (m), 1572 (m), 1437 (s), 1341 (s), 1315 (w), 1292 (w), 1254 (m), 1217 (w), 1202 (w), 1161 (w), 1121 (m), 1055 (w), 1016 (w), 889 (m), 848 (m), 806 (m), 795 (m), 758 (m), 727 (m), 710 (s), 685 (s), 677 (m), 638 (m), 629 (m). Anal. calcd. for  $\text{C}_{26}\text{H}_{24}\text{N}_2\text{O}_3$  (412.5): C 75.71, H 5.86, N 6.79; Found: C 75.69, H 5.88, N 6.79.

### 3.17 (1-Benzoyl-5-hydroxy-3-phenyl-4,5-dihydro-1H-pyrazol-5-yl)(thien-2-yl)methanone (5q)

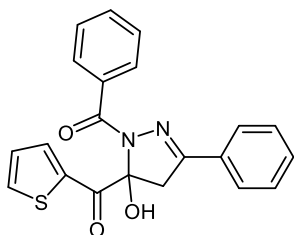

According to the GP and chromatography on silica gel (petroleum ether/ethyl acetate 5:1) compound **5q** (275 mg, 73%) was obtained as beige solid, Mp 171 °C;  $R_f$  (petroleum ether/ethyl acetate 5:1): 0.18.  $^1\text{H}$  NMR ( $\text{CDCl}_3$ , 300 MHz):  $\delta$  3.55 (d,  $J$  = 18.5 Hz, 1 H), 3.73 (d,  $J$  = 18.5 Hz, 1 H), 5.66 (br, 1 H), 7.08 (dd,  $J$  = 4.9 Hz,  $J$  = 3.9 Hz, 1 H), 7.38-7.58 (m, 6 H), 7.67 (dd,  $J$  = 4.9 Hz,  $J$  = 1.1 Hz, 1 H), 7.71-7.79 (m, 3 H), 8.00-8.01 (m, 2 H).  $^{13}\text{C}$  NMR ( $\text{CDCl}_3$ , 75 MHz):  $\delta$  46.3 ( $\text{CH}_2$ ), 92.8 ( $\text{C}_{\text{quat}}$ ), 127.2 (CH), 128.2 (CH), 128.8 (CH), 129.2 (CH), 130.7 (CH), 131.0 ( $\text{C}_{\text{quat}}$ ), 131.3 (CH), 132.2 (CH), 133.2 ( $\text{C}_{\text{quat}}$ ), 134.0 (CH), 135.6 (CH), 137.6 ( $\text{C}_{\text{quat}}$ ), 153.5 ( $\text{C}_{\text{quat}}$ ), 167.3 ( $\text{C}_{\text{quat}}$ ), 187.4 ( $\text{C}_{\text{quat}}$ ). MS (EI),  $m/z$ : 358 ( $(\text{M} - \text{H}_2\text{O})^+$ , 1), 266 (11), 265 ( $(\text{M} - \text{C}_7\text{H}_5\text{O})^+$ , 61), 185 (10), 111 (10), 105 ( $\text{C}_7\text{H}_5\text{O}^+$ , 100), 77 ( $\text{C}_6\text{H}_5^+$ , 24). IR (ATR),  $\tilde{\nu}$  [ $\text{cm}^{-1}$ ]: 1676 (m), 1626 (m), 1609 (m), 1566 (m), 1450 (m), 1429 (s), 1410 (s), 1339 (s), 1229 (m), 1206 (s), 1177 (m), 1111 (m), 1059 (m), 883 (m), 866 (m), 843 (w), 826 (m), 762 (m), 708 (s), 689 (s), 671 (m), 629 (m). Anal. calcd. for  $\text{C}_{21}\text{H}_{16}\text{N}_2\text{O}_3\text{S}$  (376.4): C 67.00, H 4.28, N 7.44; Found: C 66.94, H 4.50, N 7.18.

### 3.18 (5-Hydroxy-3-(4-methoxyphenyl)-1-(thiophen-2-carbonyl)-4,5-dihydro-1H-pyrazol-5-yl) (mesityl)methanone (5r)

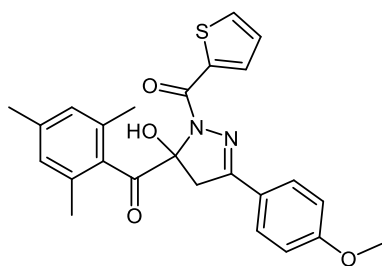

According to the GP and chromatography on silica gel (petroleum ether/ethyl acetate 10:1 to 5:1) compound **5r** (172 mg, 38%) was obtained as colorless solid, Mp 201-204 °C;  $R_f$  (petroleum ether/ethyl acetate 5:1): 0.24.  $^1\text{H}$  NMR ( $\text{CDCl}_3$ , 300 MHz):  $\delta$  2.30 (s, 3 H), 2.33 (s, 6 H), 3.56 (d,  $J$  = 17.6 Hz, 1 H), 3.75-3.95 (m, 4 H), 5.34 (s, 1 H), 6.90 (br, 2 H), 6.98 (d,  $J$  = 8.7 Hz, 2 H), 7.10-7.19 (m, 1 H), 7.67 (d,  $J$  = 4.4 Hz, 1 H), 7.72-7.84 (m, 2 H), 8.18 (d,  $J$  = 2.9 Hz, 1 H).  $^{13}\text{C}$  NMR ( $\text{CDCl}_3$ , 75 MHz):  $\delta$  20.5 ( $\text{CH}_3$ ), 21.1 ( $\text{CH}_3$ ), 46.4 ( $\text{CH}_2$ ), 55.4 ( $\text{CH}_3$ ), 95.4 ( $\text{C}_{\text{quat}}$ ), 114.3 (CH), 123.3 ( $\text{C}_{\text{quat}}$ ), 126.9 (CH), 128.7 (CH), 128.9 (CH), 133.8 ( $\text{C}_{\text{quat}}$ ), 134.0 ( $\text{C}_{\text{quat}}$ ), 134.2 (CH), 135.3 (CH), 136.5 ( $\text{C}_{\text{quat}}$ ), 139.8 ( $\text{C}_{\text{quat}}$ ), 153.1 ( $\text{C}_{\text{quat}}$ ), 160.1 ( $\text{C}_{\text{quat}}$ ), 161.7 ( $\text{C}_{\text{quat}}$ ), 207.5 ( $\text{C}_{\text{quat}}$ ). MS (EI),  $m/z$ : 430 ( $(\text{M} - \text{H}_2\text{O})^+$ , 9), 319 ( $(\text{M} - \text{C}_5\text{H}_3\text{OS} - \text{H}_2\text{O})^+$ , 20), 302 (18), 301 ( $(\text{M} - \text{C}_{10}\text{H}_{11}\text{O})^+$ , 76), 291 (16), 147 ( $\text{C}_{10}\text{H}_{11}\text{O}^+$ , 17), 111 ( $\text{C}_5\text{H}_3\text{OS}^+$ , 100), 43 (16). IR (ATR),  $\tilde{\nu}$  [ $\text{cm}^{-1}$ ]: 3237 (w), 1686 (w), 1605 (s), 1591 (m), 1562 (w), 1516 (m), 1452 (s), 1420 (m), 1346 (m), 1329 (m), 1310 (m), 1252 (s), 1217 (m), 1207 (w), 1177 (m), 1161 (w), 1109 (s), 1063 (w), 1045 (m), 1038 (m), 1016 (m), 1005 (w), 941 (w), 908 (w), 881 (m), 841 (s), 816 (s), 791 (m), 733 (m), 712 (s), 681 (m), 633 (m). Anal. calcd. for  $\text{C}_{25}\text{H}_{24}\text{N}_2\text{O}_4\text{S}$  (448.5): C 66.94, H 5.39, N 6.25, S 7.15; Found: C 67.19, H 5.60, N 6.02, S 7.11.

## 4 Attempted aromatization of 1,5-diacyl-5-hydroxypyrazoline 5b

A series of experiments was conducted to achieve a dehydrative aromatization of compound **5b** to give 1,5-diacylpyrazole **7**. In a Schlenk flask with magnetic stirring bar and screw cap were placed 5-hydroxy-3-phenyl-4,5-dihydro-1*H*-pyrazol-1,5-diyl)bis(phenylmethanone) (**5b**, 37 mg, 0.1 mmol) and 1,4-dioxane (0.5 mL) under argon. Then, various additives were added to the reaction mixture and conditions were applied (for experimental details see Table S5). For workup deionized water (5 mL) was added and the mixture extracted with dichloromethane (4 × 5 mL). The combined organic phases were dried (anhydrous sodium sulfate) and the solvents were removed in vacuo. The residue was adsorbed on celite® and chromatographed on silica gel (petroleum ether/ethyl acetate 5:1) to give either **5b** or pyrazole **6a**. The spectroscopic data were in full agreement with the reference compounds.

**Table S5:** Attempted dehydrative aromatization of 5-hydroxypyrazoline **5b**.

| Entry          | Additive                                             | Conditions                                    | Result                             |
|----------------|------------------------------------------------------|-----------------------------------------------|------------------------------------|
| 1              | H <sub>2</sub> O (3.6 mg, 0.2 mmol)                  | rt, then 150 °C (oil bath), 47.5 h            | no conversion <sup>[a]</sup>       |
| 2              | CH <sub>3</sub> CO <sub>2</sub> H (0.1 mL, 0.2 mmol) | rt, then 150 °C (oil bath), 47.5 h            | <b>6a</b> (n.i.) <sup>[b]</sup>    |
| 3              | PTSA · H <sub>2</sub> O (39 mg, 0.2 mmol)            | rt, then 150 °C (oil bath), 47.5 h            | <b>6a</b> (n.i.) <sup>[a]</sup>    |
| 4 <sup>d</sup> | 1 N HCl (0.25 mL, 0.25 mmol)                         | rt for 23 h, then 80 °C (oil bath), 7.5 h     | <b>6a</b> (n.i.) <sup>[c]</sup>    |
| 5 <sup>e</sup> | silica gel                                           | 110 °C, 18 h                                  | no conversion <sup>[a]</sup>       |
| 6              | K <sub>2</sub> CO <sub>3</sub> (28 mg, 0.2 mmol)     | 1,4-dioxane, rt–150 °C, 47.5 h                | mixture of products <sup>[a]</sup> |
| 7 <sup>f</sup> | pyridine (16 mg, 0.2 mmol)                           | CH <sub>2</sub> Cl <sub>2</sub> , 30 °C, 14 h | no conversion <sup>[a]</sup>       |

[a] TLC monitoring. [b] GC–MS monitoring. [c] Confirmed by MALDI-MS. [d] On a 0.25 mmol scale. [e] In toluene instead of 1,4-dioxane. [f] In dichloromethane instead of 1,4-dioxane.

Compound **5b** is either stable against the additives and conditions or dehydrative deacylation furnishes pyrazole **6a**.

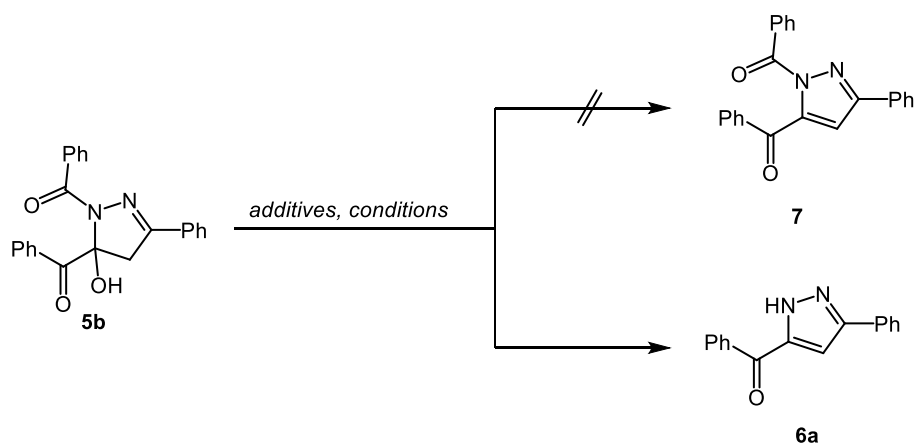

## 5 $^1\text{H}$ and $^{13}\text{C}$ NMR spectra

### 5.1 *tert*-Butyl 5-benzoyl-5-hydroxy-3-phenyl-4,5-dihydro-1*H*-pyrazole-1-carboxylate (5a)

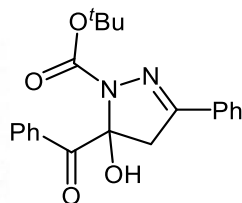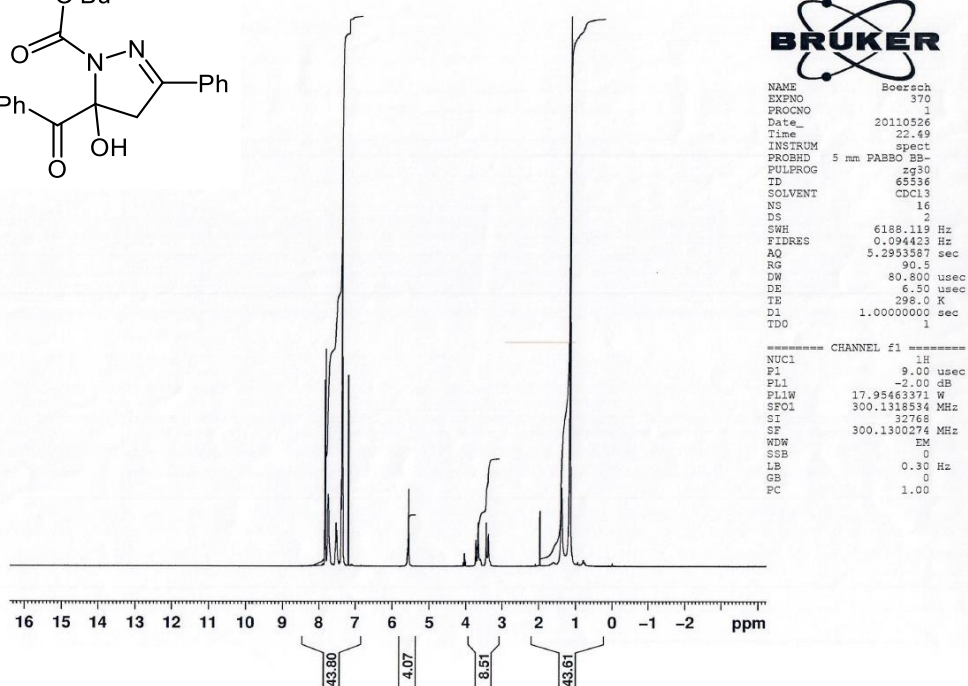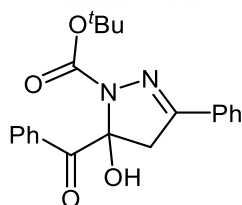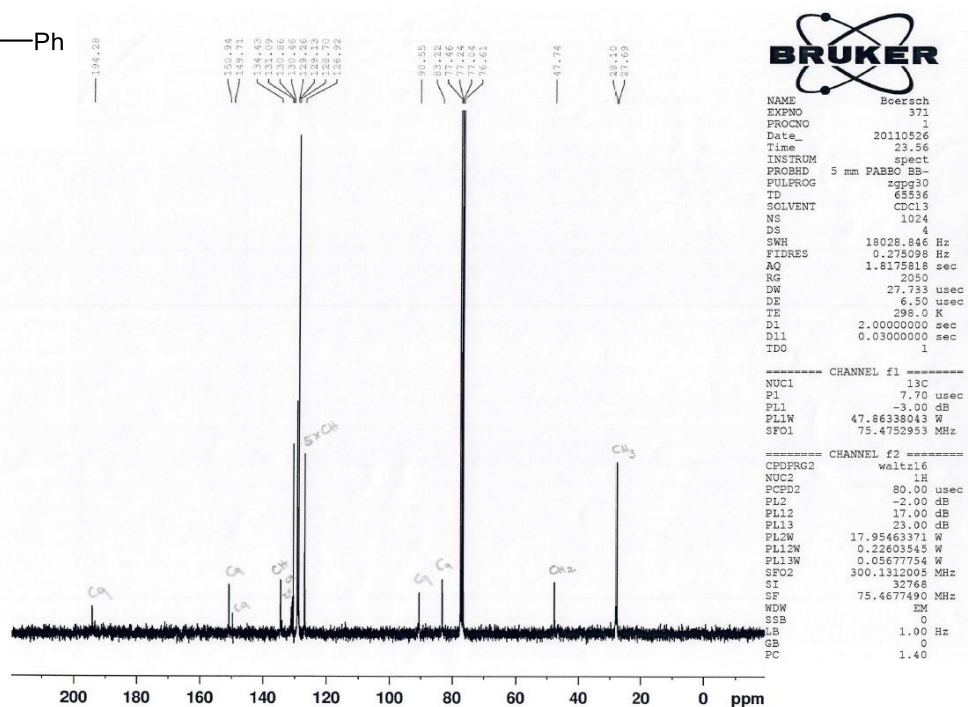

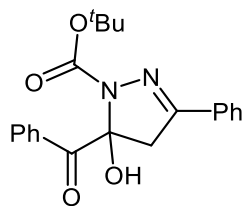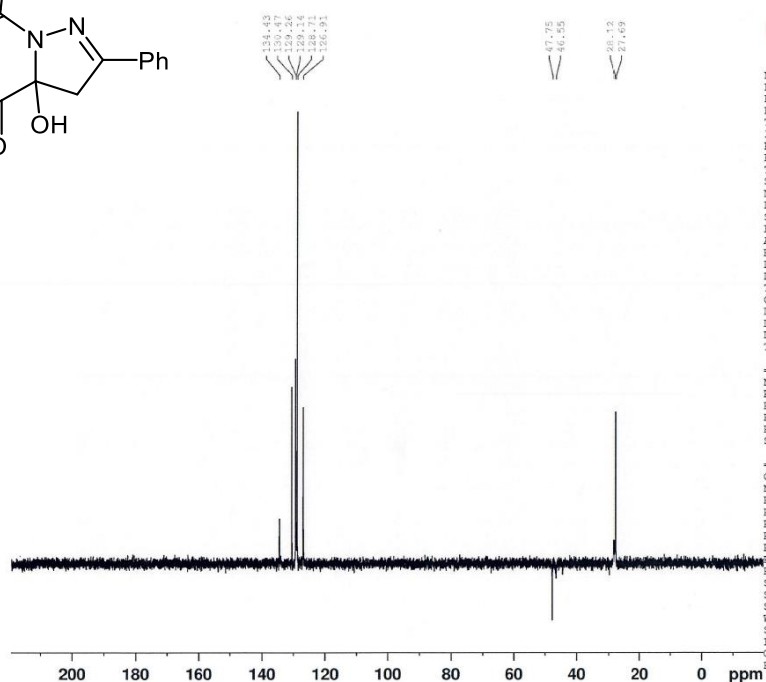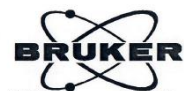

NAME Boersch  
EXPNO 420  
PROCNO 1  
Date\_ 20110531  
Time 22.58  
INSTRUM spect  
PROBHD 5 mm PABBO BB-  
PULPROG sept135  
TD 65536  
SOLVENT CDCl3  
NS 256  
DS 4  
SWH 18028.846 Hz  
FIDRES 0.275098 Hz  
AQ 1.8175818 sec  
RG 2050  
DW 27.733 usec  
DE 6.50 usec  
TE 298.0 K  
CNSI2 145.000000  
D1 2.0000000 sec  
D2 0.00344828 sec  
D12 0.00002000 sec  
TDO 1

===== CHANNEL f1 =====  
NUC1 13C  
P1 7.70 usec  
P2 15.40 usec  
PL1 -3.00 dB  
PL1W 47.86338043 W  
SFO1 75.4752953 MHz

===== CHANNEL f2 =====  
CPDPRG2 waltz16  
NUC2 1H  
P3 9.00 usec  
P4 18.00 usec  
PCPD2 80.00 usec  
PL2 -2.00 dB  
PL12 17.00 dB  
PL2W 17.95463371 W  
PL12W 0.22603545 W  
SFO2 300.1312005 MHz  
S1 32768  
SF 75.4677490 MHz  
WDW EM  
SSB 0  
LB 1.00 Hz  
GB 0  
PC 1.40

## 5.2 (5-Hydroxy-3-phenyl-4,5-dihydro-1H-pyrazol-1,5-diyl)bis(phenylmethanone) (5b)

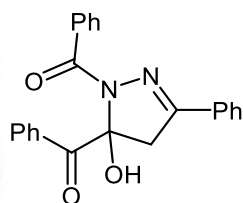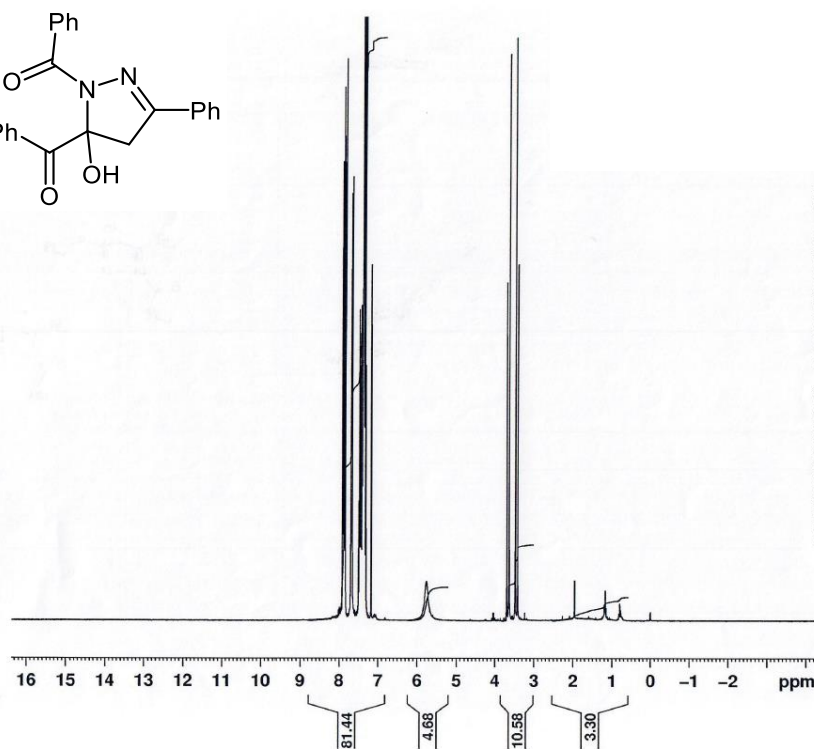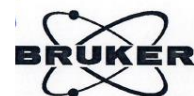

```

NAME      Boersch
EXPNO     590
PROCNO    1
Date_     20110803
Time      22.14
INSTRUM   spect
PROBHD    5 mm PABBO BB-
PULPROG   zg30
TD         65536
SOLVENT   CDCl3
NS         16
DS         2
SWH        6188.119 Hz
FIDRES     0.094423 Hz
AQ         5.2953587 sec
RG         101
DW         80.800 usec
DE         6.50 usec
TE         298.0 K
D1         1.0000000 sec
TDO        1

```

```

===== CHANNEL f1 =====
NUC1      1H
P1         9.00 usec
PL1       -2.00 dB
PL1W      17.95463371 W
SFO1      300.1318534 MHz
SI         32768
SF        300.1300325 MHz
WDW        EM
SSB        0
LB         0.30 Hz
GB         0
PC         1.00

```

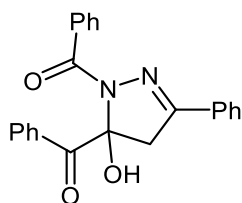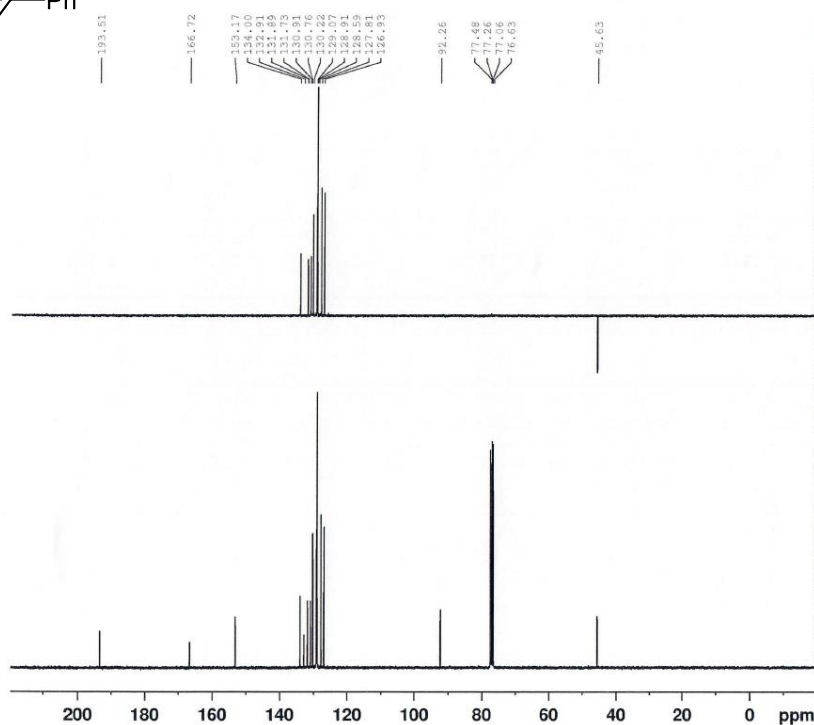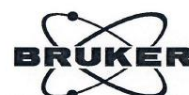

```

NAME      Boersch
EXPNO     600
PROCNO    1
Date_     20110806
Time      1.19
INSTRUM   spect
PROBHD    5 mm PABBO BB-
PULPROG   zgpg30
TD         65536
SOLVENT   CDCl3
NS         1536
DS         4
SWH        18028.846 Hz
FIDRES     0.275098 Hz
AQ         1.8175818 sec
RG         2050
DW         27.733 usec
DE         6.50 usec
TE         298.0 K
D1         2.0000000 sec
D11        0.03000000 sec
TDO        1

```

```

===== CHANNEL f1 =====
NUC1      13C
P1         7.70 usec
PL1       -3.00 dB
PL1W      47.86338043 W
SFO1      75.4752953 MHz

```

```

===== CHANNEL f2 =====
CPDPRG2   waltz16
NUC2      1H
PCPD2     80.00 usec
PL2       -2.00 dB
PL12      17.00 dB
PL13      23.00 dB
PL2W      17.95463371 W
PL12W     0.22603545 W
PL13W     0.05677754 W
SFO2      300.1312005 MHz
SI         32768
SF        75.4677490 MHz
WDW        EM
SSB        0
LB         1.00 Hz
GB         0
PC         1.40

```

### 5.3 (5-Benzoyl-5-hydroxy-3-phenyl-4,5-dihydro-1H-pyrazol-1-yl)(4-tolyl)methanone (5c)

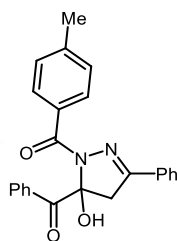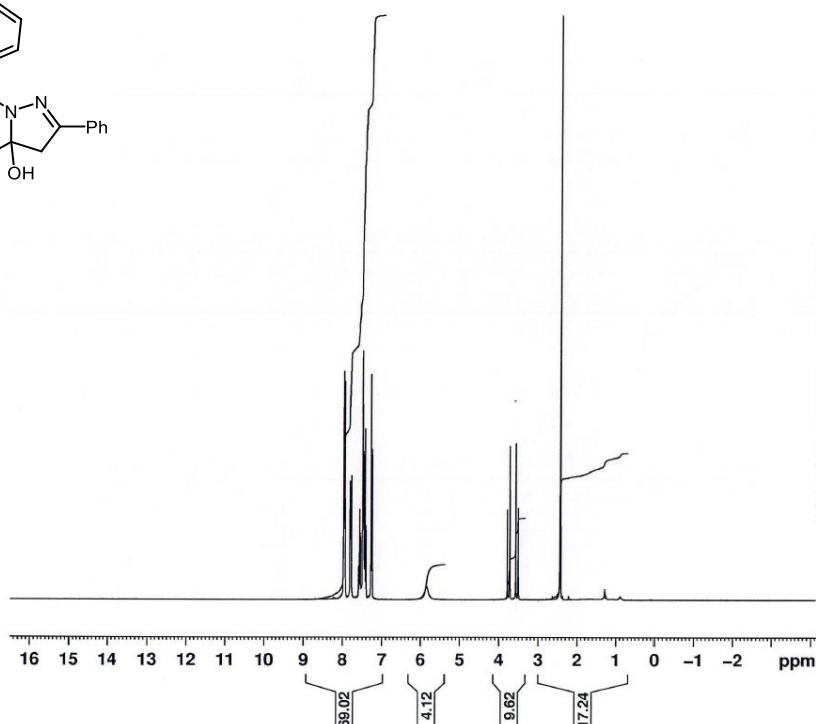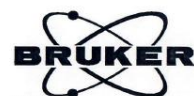

NAME Boden  
EXPNO 160  
PROCNO 1  
Date\_ 20120113  
Time 23.06  
INSTRUM spect  
PROBHD 5 mm PABBO BB-  
PULPROG zg30  
TD 65536  
SOLVENT CDCl3  
NS 16  
DS 2  
SWH 6188.119 Hz  
FIDRES 0.094423 Hz  
AQ 5.2953587 sec  
RG 128  
DW 80.800 usec  
DE 6.50 usec  
TE 298.0 K  
D1 1.0000000 sec  
TDO 1

===== CHANNEL f1 =====  
NUC1 1H  
P1 9.00 usec  
PL1 -2.00 dB  
PL1W 17.95463371 W  
SFO1 300.1318534 MHz  
SI 32768  
SF 300.1300000 MHz  
WDW EM  
SSB 0  
LB 0.30 Hz  
GB 0  
PC 1.00

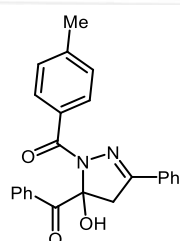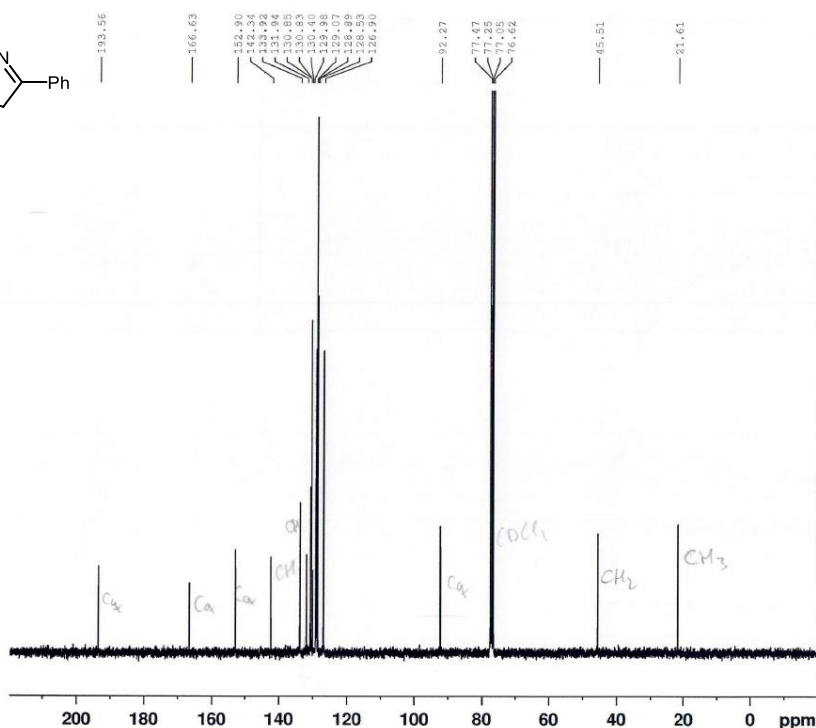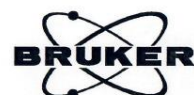

NAME Boden  
EXPNO 161  
PROCNO 1  
Date\_ 20120114  
Time 0.14  
INSTRUM spect  
PROBHD 5 mm PABBO BB-  
PULPROG zgpg30  
TD 65536  
SOLVENT CDCl3  
NS 1024  
DS 4  
SWH 18028.846 Hz  
FIDRES 0.275098 Hz  
AQ 1.8175818 sec  
RG 1620  
DW 27.783 usec  
DE 6.50 usec  
TE 298.0 K  
D1 2.0000000 sec  
D11 0.0300000 sec  
TDO 1

===== CHANNEL f1 =====  
NUC1 13C  
P1 7.70 usec  
PL1 -3.00 dB  
PL1W 47.86338043 W  
SFO1 75.4752953 MHz

===== CHANNEL f2 =====  
CPDPRG2 waltz16  
NUC2 1H  
PCPD2 80.00 usec  
PL2 -2.00 dB  
PL12 17.00 dB  
PL13 23.00 dB  
PL2W 17.95463371 W  
PL12W 0.22603545 W  
PL13W 0.05677754 W  
SFO2 300.1312005 MHz  
SI 32768  
SF 75.4677490 MHz  
WDW EM  
SSB 0  
LB 1.00 Hz  
GB 0  
PC 1.40



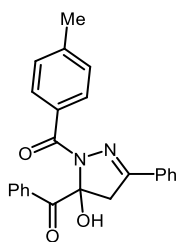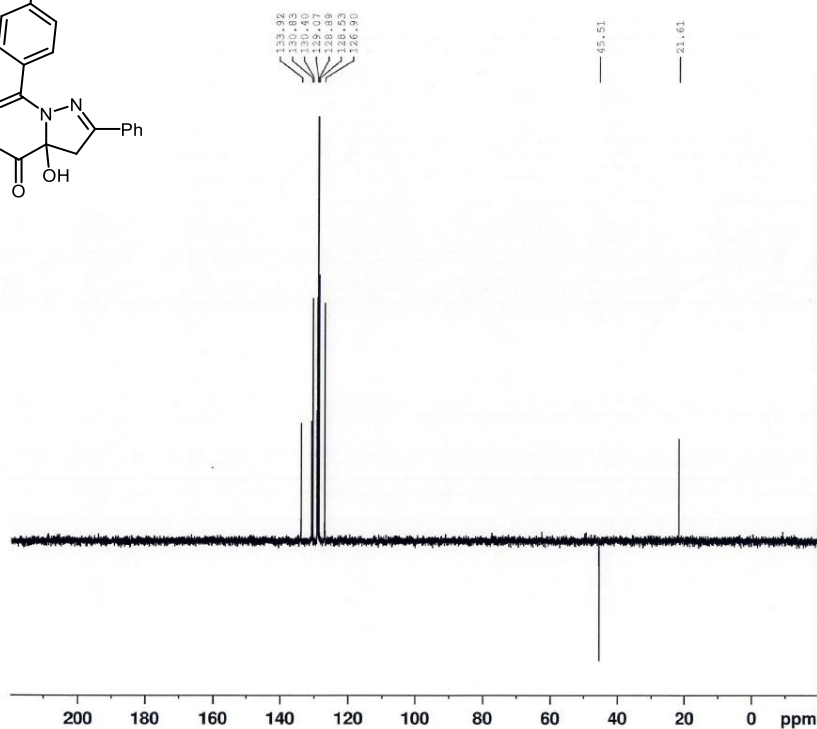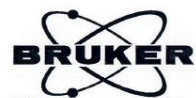

NAME Boden  
EXPNO 162  
PROCNO 1  
Date\_ 20120113  
Time 23.03  
INSTRUM spect  
PROBHD 5 mm PABBO BB-  
PULPROG dept135  
TD 65536  
SOLVENT CDCl3  
NS 256  
DS 4  
SWH 18028.846 Hz  
FIDRES 0.275098 Hz  
AQ 1.8175818 sec  
RG 2050  
DW 27.733 usec  
DE 6.50 usec  
TE 298.0 K  
CNST2 145.0000000  
D1 2.00000000 sec  
D2 0.0034828 sec  
D12 0.00002000 sec  
TD0 1

===== CHANNEL f1 =====  
NUC1 13C  
P1 7.70 usec  
P2 15.40 usec  
PL1 -3.00 dB  
PL1W 47.86338043 W  
SFO1 75.4752953 MHz

===== CHANNEL f2 =====  
CPDPRG2 waltz16  
NUC2 1H  
P3 9.00 usec  
P4 18.00 usec  
PCPD2 80.00 usec  
PL2 -2.00 dB  
PL12 17.00 dB  
PL2W 17.95463371 W  
PL12W 0.22603545 W  
SFO2 300.1312005 MHz  
S1 32766  
SF 75.4677490 MHz  
WDW EM  
SSB 0  
LB 1.00 Hz  
GB 0  
PC 1.40

# 5.4 (5-Benzoyl-5-hydroxy-3-phenyl-4,5-dihydro-1H-pyrazol-1-yl)(4-bromophenyl)methanone (5d)

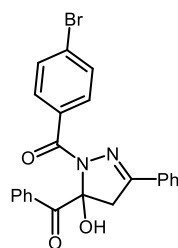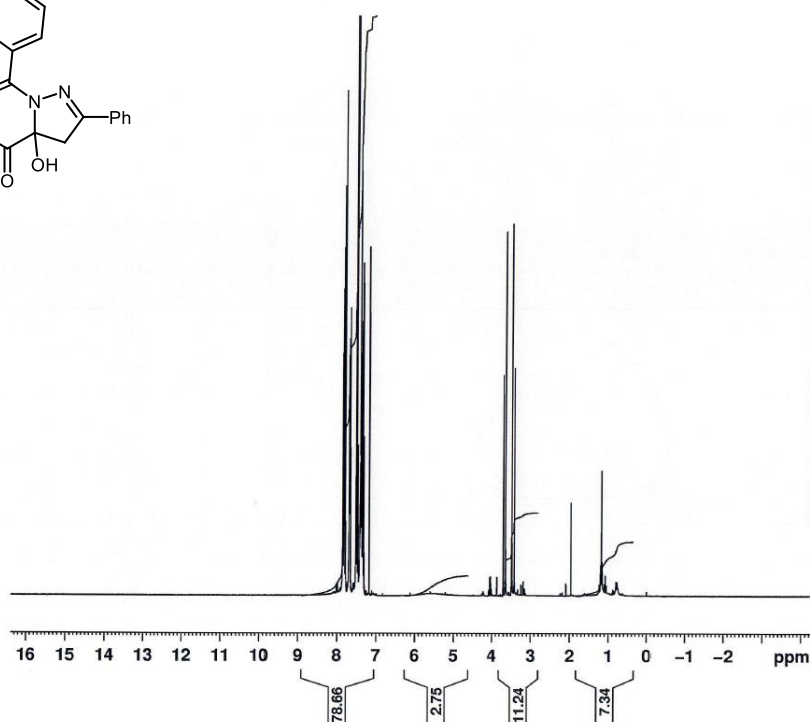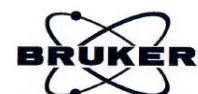

NAME Boersch  
EXPNO 1130  
PROCNO 1  
Date\_ 20120427  
Time 3.46  
INSTRUM spect  
PROBHD 5 mm PABBO BB-  
PULPROG zg30  
TD 65536  
SOLVENT CDCl3  
NS 16  
DS 2  
SWH 6188.119 Hz  
FIDRES 0.094423 Hz  
AQ 5.2953587 sec  
RG 90.5  
DW 80.800 usec  
DE 6.50 usec  
TE 297.0 K  
D1 1.00000000 sec  
TD0 1

===== CHANNEL f1 =====  
NUC1 1H  
P1 9.00 usec  
PL1 -2.00 dB  
PL1W 17.95463371 W  
SFO1 300.1318534 MHz  
SI 32768  
SF 300.1300307 MHz  
WDW EM  
SSB 0  
LB 0.30 Hz  
GB 0  
PC 1.00

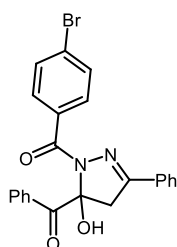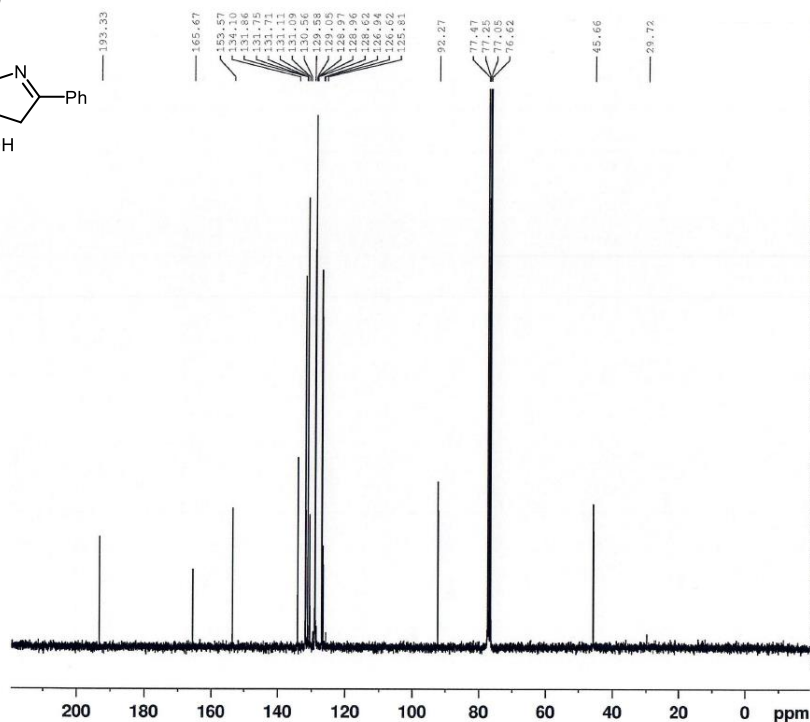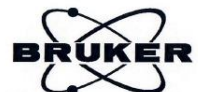

NAME Boersch  
EXPNO 1131  
PROCNO 1  
Date\_ 20120427  
Time 5.27  
INSTRUM spect  
PROBHD 5 mm PABBO BB-  
PULPROG zgpg30  
TD 65536  
SOLVENT CDCl3  
NS 1536  
DS 4  
SWH 18028.846 Hz  
FIDRES 0.275098 Hz  
AQ 1.8175818 sec  
RG 1290  
DW 27.733 usec  
DE 6.50 usec  
TE 297.0 K  
D1 2.00000000 sec  
D11 0.03000000 sec  
TD0 1

===== CHANNEL f1 =====  
NUC1 13C  
P1 7.70 usec  
PL1 -3.00 dB  
PL1W 47.86338043 W  
SFO1 75.4752953 MHz

===== CHANNEL f2 =====  
CPDPRG2 waltz16  
NUC2 1H  
PCPD2 80.00 usec  
PL2 -2.00 dB  
PL12 17.00 dB  
PL13 23.00 dB  
PL2W 17.95463371 W  
PL12W 0.22603945 W  
PL13W 0.05677754 W  
SFO2 300.1312005 MHz  
SI 32768  
SF 75.4677490 MHz  
WDW EM  
SSB 0  
LB 1.00 Hz  
GB 0  
PC 1.40

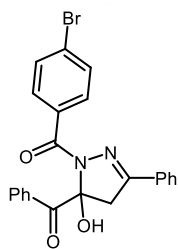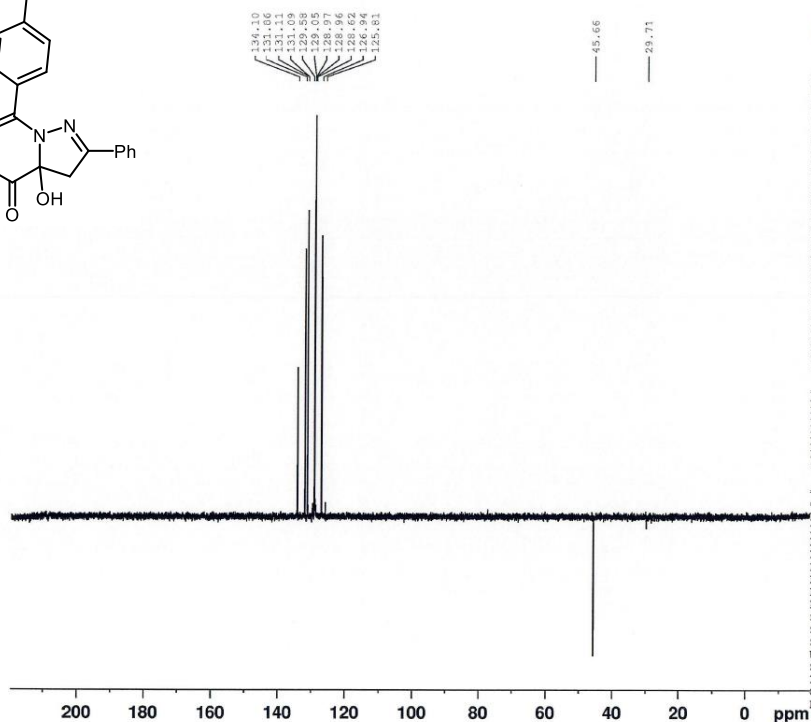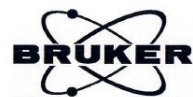

NAME Boersch  
EXPNO 1132  
PROCNO 1  
Date 20120427  
Time 5.44  
INSTRUM spect  
PROBHD 5 mm PABBO BB-  
PULPROG dept135  
TD 65536  
SOLVENT CDCl3  
NS 512  
DS 4  
SWH 18028.846 Hz  
FIDRES 0.275098 Hz  
AQ 1.8175818 sec  
RG 2050  
DW 27.733 usec  
DE 6.50 usec  
TE 297.0 K  
CNST2 145.0000000  
D1 2.00000000 sec  
D2 0.00344828 sec  
D12 0.00002000 sec  
TD0 2

===== CHANNEL f1 =====  
NUC1 13C  
P1 7.70 usec  
P2 15.40 usec  
PL1 -3.00 dB  
PL1W 47.86338043 W  
SFO1 75.4752953 MHz

===== CHANNEL f2 =====  
CPDPRG2 waltz16  
NUC2 1H  
P3 9.00 usec  
P4 18.00 usec  
PCPD2 80.00 usec  
PL2 -2.00 dB  
PL12 17.00 dB  
PL2W 17.95463371 W  
PL12W 0.22603543 W  
SFO2 300.1312005 MHz  
SI 32768  
SF 75.4677490 MHz  
WDW EM  
SSB 0  
LB 1.00 Hz  
GB 0  
PC 1.40

# 5.5 (5-Benzoyl-5-hydroxy-3-phenyl-4,5-dihydro-1H-pyrazol-1-yl)(thien-2-yl)methanone (5e)

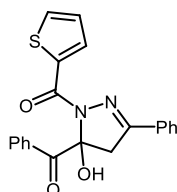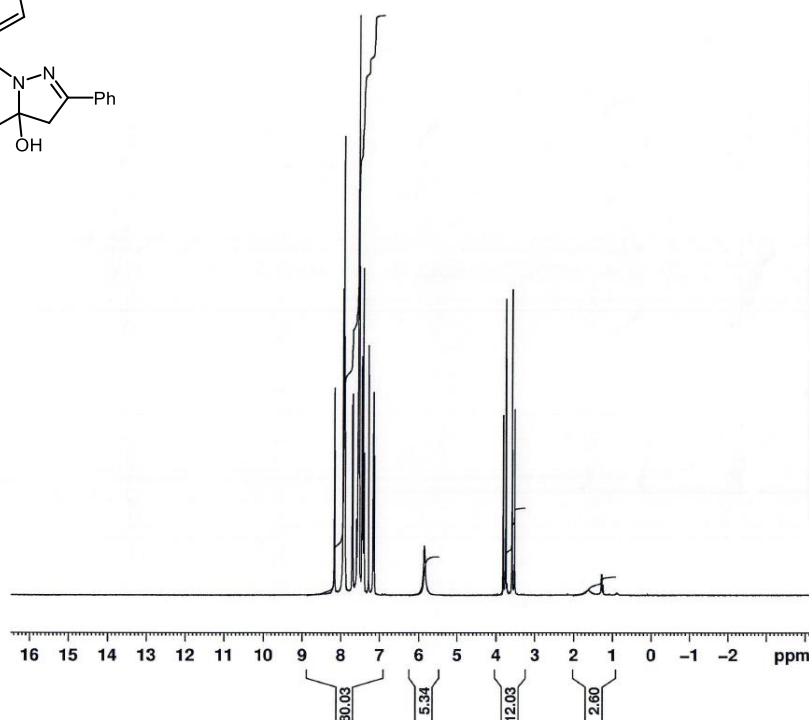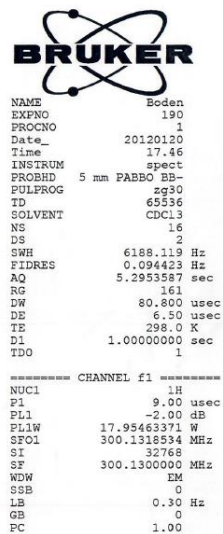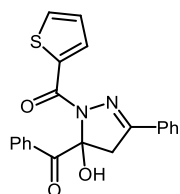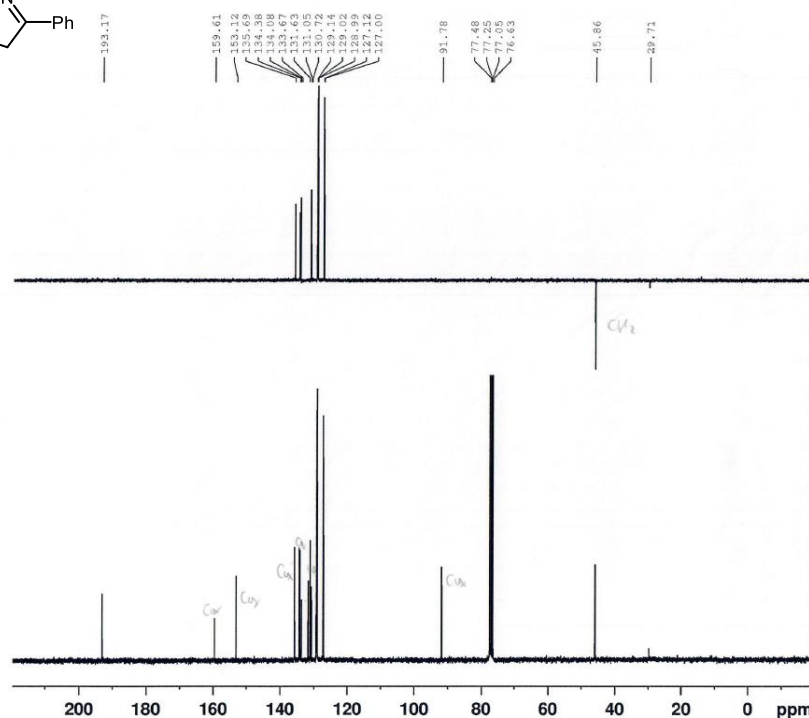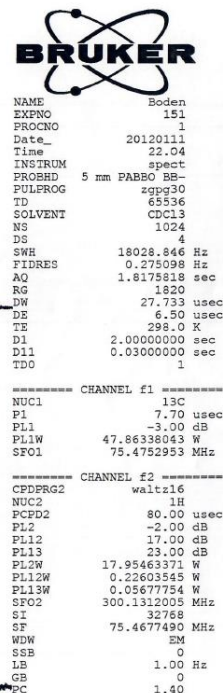

# 5.6 (5-Benzoyl-5-hydroxy-3-phenyl-4,5-dihydro-1H-pyrazol-1-yl)(furan-2-yl)methanone (5f)

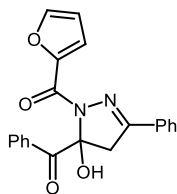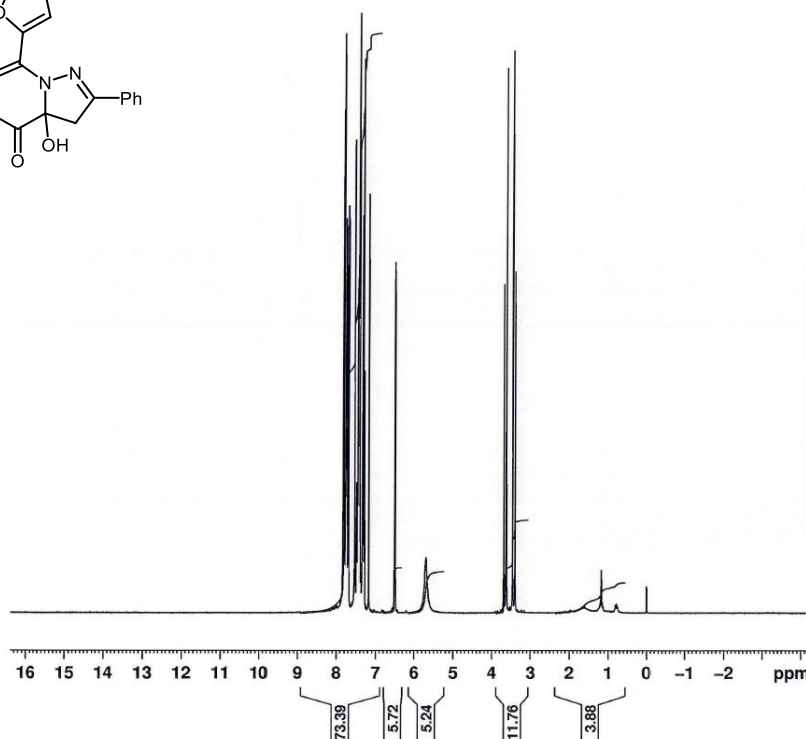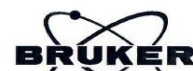

NAME Boersch  
EXPNO 980  
PROCNO 1  
Date\_ 20120229  
Time 7.01  
INSTRUM spect  
PROBHD 5 mm PABBO BB-  
PULPROG zg30  
TD 65536  
SOLVENT CDCl3  
NS 16  
DS 2  
SWH 6188.119 Hz  
FIDRES 0.094423 Hz  
AQ 5.2953587 sec  
RG 144  
DW 80.800 usec  
DE 6.50 usec  
TE 298.0 K  
D1 1.00000000 sec  
TDO 1

===== CHANNEL f1 =====  
NUC1 1H  
P1 9.00 usec  
PL1 -2.00 dB  
PL1W 17.95463371 W  
SFO1 300.1318534 MHz  
SI 32768  
SF 300.1300293 MHz  
WDW EM  
SSB 0  
LB 0.30 Hz  
GB 0  
PC 1.00

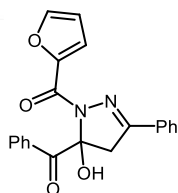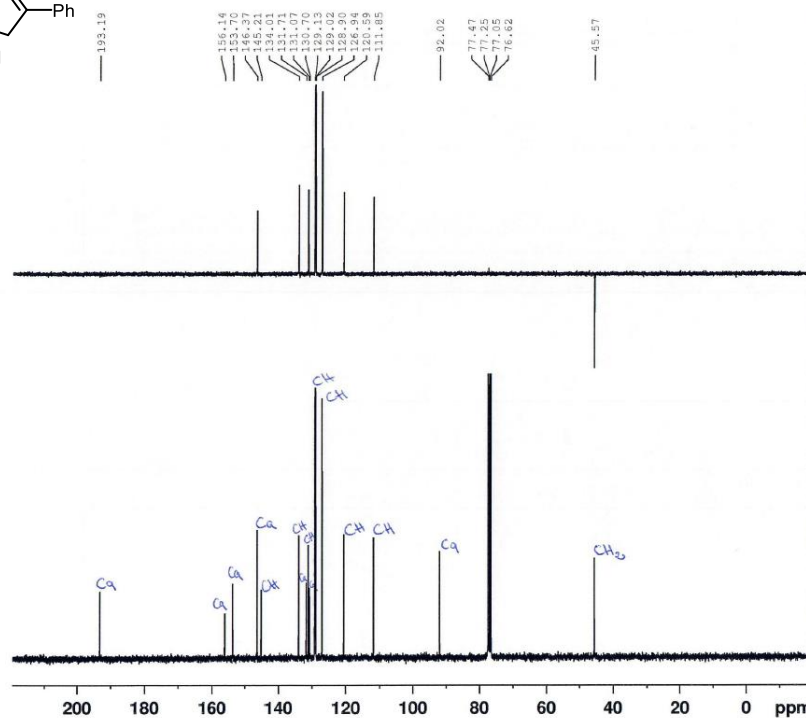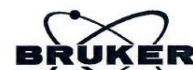

NAME Boersch  
EXPNO 981  
PROCNO 1  
Date\_ 20120229  
Time 8.09  
INSTRUM spect  
PROBHD 5 mm PABBO BB-  
PULPROG zgpg30  
TD 65536  
SOLVENT CDCl3  
NS 1024  
DS 4  
SWH 18028.846 Hz  
FIDRES 0.275098 Hz  
AQ 1.8175818 sec  
RG 1030  
CW 27.733 usec  
DE 6.50 usec  
TE 298.0 K  
D1 2.00000000 sec  
D11 0.03000000 sec  
TDO 1

===== CHANNEL f1 =====  
NUC1 13C  
P1 7.70 usec  
PL1 -3.00 dB  
PL1W 47.86338043 W  
SFO1 75.4752953 MHz

===== CHANNEL f2 =====  
CPDPRG2 waltz16  
NUC2 1H  
PCPD2 80.00 usec  
PL2 -2.00 dB  
PL12 17.00 dB  
PL13 23.00 dB  
PL2W 17.95463371 W  
PL12W 0.22603545 W  
PL13W 0.05677754 W  
SFO2 300.1312005 MHz  
SI 32768  
SF 75.4677490 MHz  
WDW EM  
SSB 0  
LB 1.00 Hz  
GB 0  
PC 1.40

O=C1C(=O)N(Cc2ccccc2)C(=O)C1(O)c3ccccc3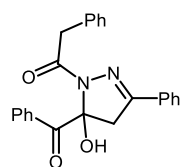

## 5.8 1-(5-Benzoyl-5-hydroxy-3-phenyl-4,5-dihydro-1*H*-pyrazol-1-yl)-2-methylpropan-1-one (5h)

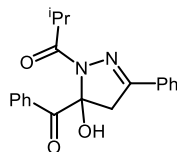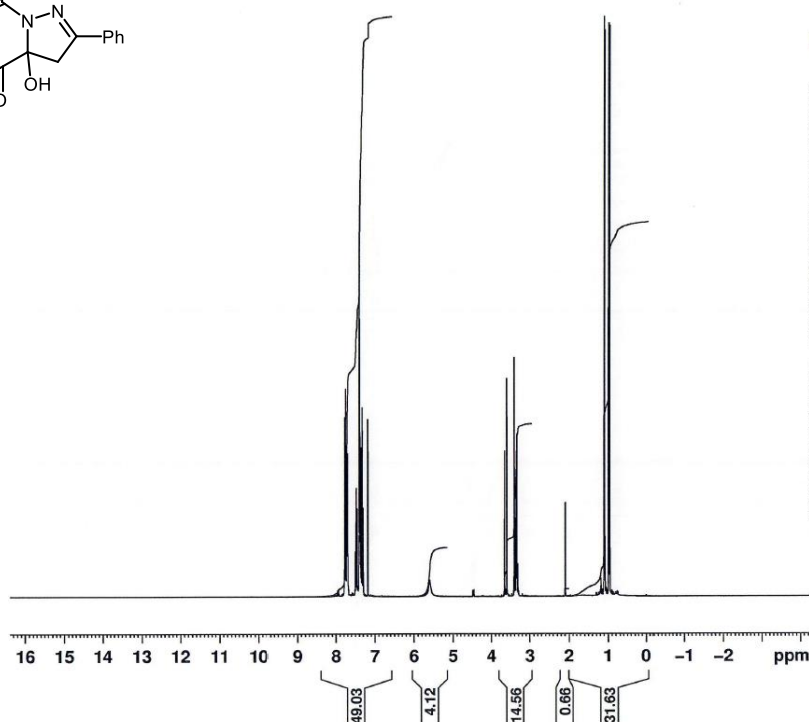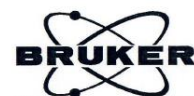

NAME Boersch  
EXPNO 940  
PROCNO 1  
Date\_ 20120224  
Time 12.35  
INSTRUM spect  
PROBHD 5 mm PABBO BB-  
PULPROG zgpg30  
TD 65536  
SOLVENT CDCl<sub>3</sub>  
NS 16  
DS 2  
SWH 6188.119 Hz  
FIDRES 0.094423 Hz  
AQ 5.2953587 sec  
RG 114  
DW 80.800 usec  
DE 6.50 usec  
TE 298.0 K  
D1 1.0000000 sec  
TDO 1

===== CHANNEL f1 =====  
NUC1 1H  
P1 9.00 usec  
PL1 -2.00 dB  
PL1W 17.95463371 W  
SFO1 300.1318534 MHz  
SI 32768  
SF 300.1300293 MHz  
WDW EM  
SSB 0  
LB 0.30 Hz  
GB 0  
PC 1.00

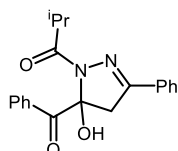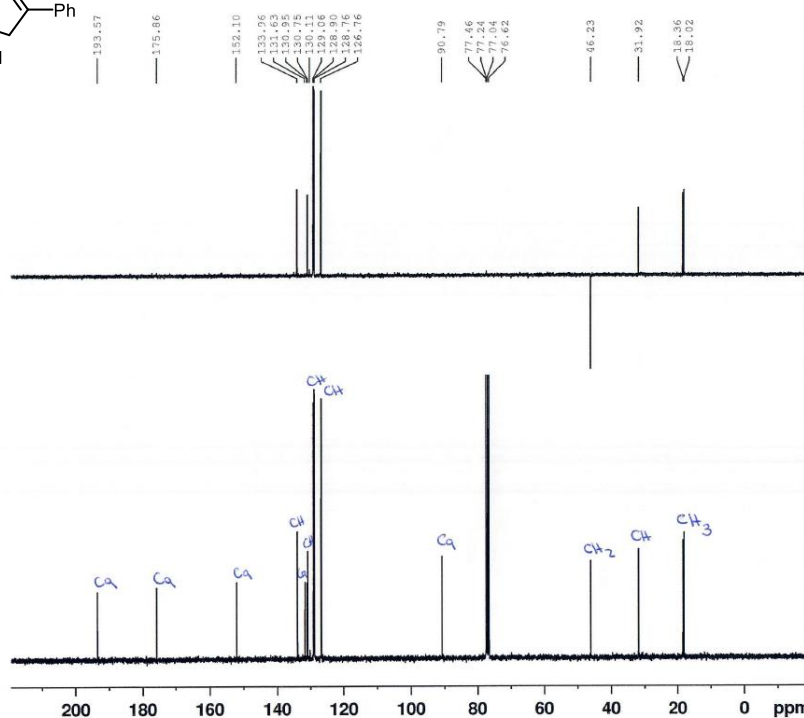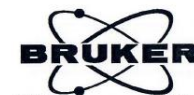

NAME Boersch  
EXPNO 941  
PROCNO 1  
Date\_ 20120224  
Time 13.43  
INSTRUM spect  
PROBHD 5 mm PABBO BB-  
PULPROG zgpg30  
TD 65536  
SOLVENT CDCl<sub>3</sub>  
NS 1024  
DS 4  
SWH 18028.846 Hz  
FIDRES 0.275098 Hz  
AQ 1.8175818 sec  
RG 1030  
DW 27.733 usec  
DE 6.50 usec  
TE 298.0 K  
D1 2.0000000 sec  
D11 0.03000000 sec  
TDO 1

===== CHANNEL f1 =====  
NUC1 13C  
P1 7.70 usec  
PL1 -3.00 dB  
PL1W 47.86338043 W  
SFO1 75.4752953 MHz

===== CHANNEL f2 =====  
CPDPRG2 waltz16  
NUC2 1H  
PCPD2 80.00 usec  
PL2 -2.00 dB  
PL12 17.00 dB  
PL13 23.00 dB  
PL2W 17.95463371 W  
PL12W 0.22603545 W  
PL13W 0.05677754 W  
SFO2 300.1312005 MHz  
SI 32768  
SF 75.4677490 MHz  
WDW EM  
SSB 0  
LB 1.00 Hz  
GB 0  
PC 1.40



# 5.9 (5-Benzoyl-5-hydroxy-3-phenyl-4,5-dihydro-1H-pyrazol-1-yl)(cyclopropyl)-methanone (5i)

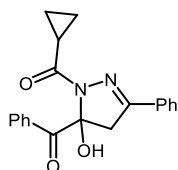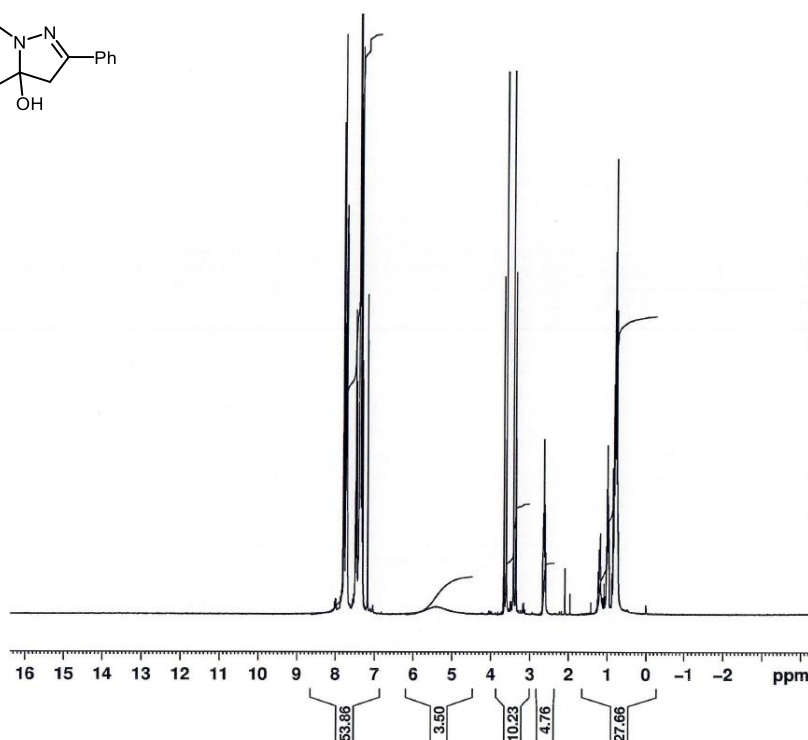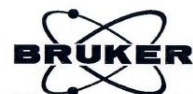

NAME Boersch  
EXPNO 1030  
PROCNO 1  
Date\_ 20120314  
Time 17.39  
INSTRUM spect  
PROBHD 5 mm PABBO BB-  
PULPROG zgpg30  
TD 65536  
SOLVENT CDCl<sub>3</sub>  
NS 16  
DS 2  
SWH 6188.119 Hz  
FIDRES 0.094423 Hz  
AQ 5.2953587 sec  
RG 71.8  
DW 80.800 usec  
DE 6.50 usec  
TE 298.0 K  
D1 1.00000000 sec  
TD0 1

===== CHANNEL f1 =====  
NUC1 1H  
P1 9.00 usec  
PL1 -2.00 dB  
PL1W 17.95463371 W  
SFO1 300.1318534 MHz  
SI 32768  
SF 300.1300298 MHz  
WDW EM  
SSB 0  
LB 0.30 Hz  
GB 0  
PC 1.00

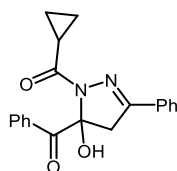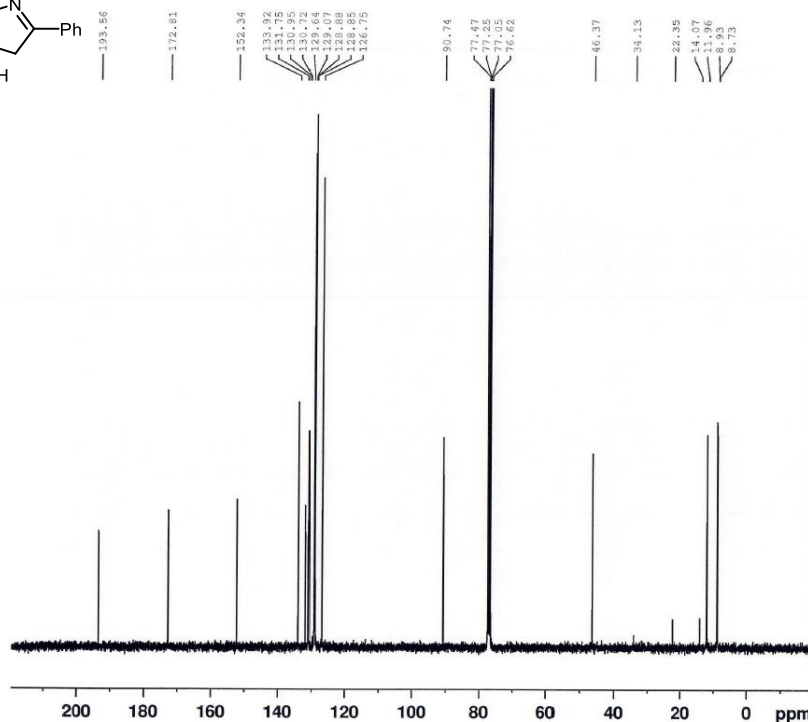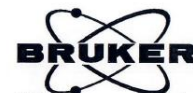

NAME Boersch  
EXPNO 1031  
PROCNO 1  
Date\_ 20120314  
Time 19.20  
INSTRUM spect  
PROBHD 5 mm PABBO BB-  
PULPROG zgpg30  
TD 65536  
SOLVENT CDCl<sub>3</sub>  
NS 1536  
DS 4  
SWH 18028.846 Hz  
FIDRES 0.275098 Hz  
AQ 1.8175818 sec  
RG 1620  
DW 27.733 usec  
DE 6.50 usec  
TE 298.0 K  
D1 2.00000000 sec  
D11 0.03000000 sec  
TD0 1

===== CHANNEL f1 =====  
NUC1 13C  
P1 7.70 usec  
PL1 -3.00 dB  
PL1W 47.86338043 W  
SFO1 75.4752953 MHz

===== CHANNEL f2 =====  
CPDPRG2 waltz16  
NUC2 1H  
PCPD2 80.00 usec  
PL2 -2.00 dB  
PL12 17.00 dB  
PL13 23.00 dB  
PL12W 17.95463371 W  
PL13W 0.22603545 W  
PL13W 0.05677754 W  
SFO2 300.1312005 MHz  
SI 32768  
SF 75.4677490 MHz  
WDW EM  
SSB 0  
LB 1.00 Hz  
GB 0  
PC 1.40



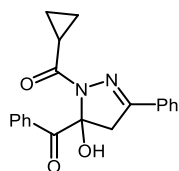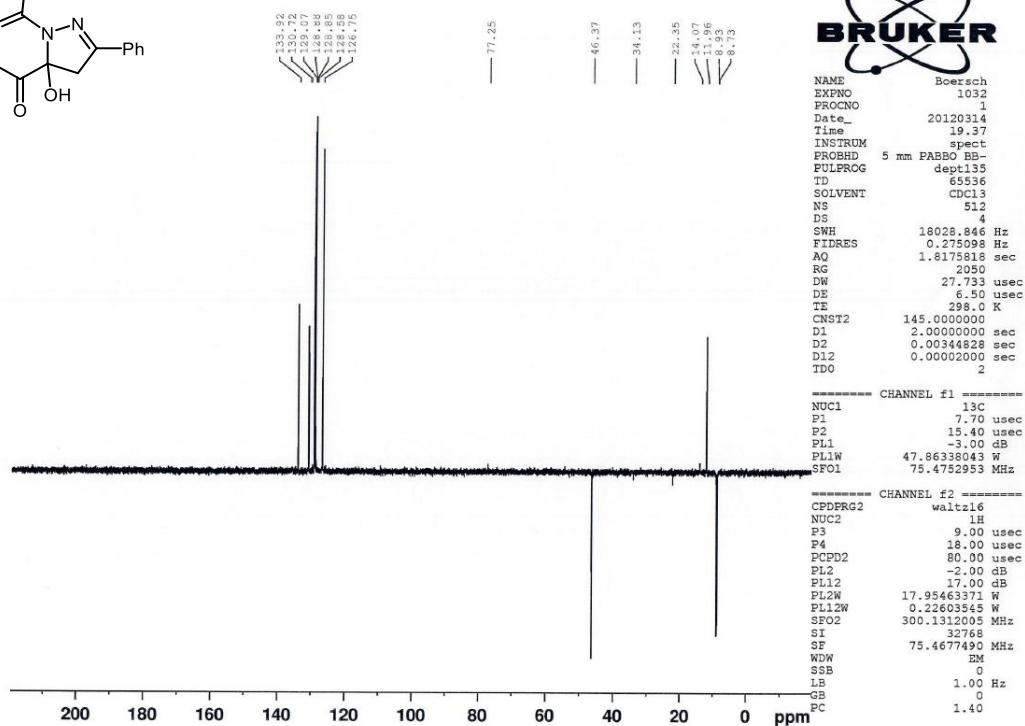

# 5.10 1-(5-Benzoyl-5-hydroxy-3-phenyl-4,5-dihydro-1H-pyrazol-1-yl)-2,2-dimethylpropan-1-one (5j)

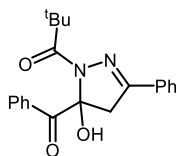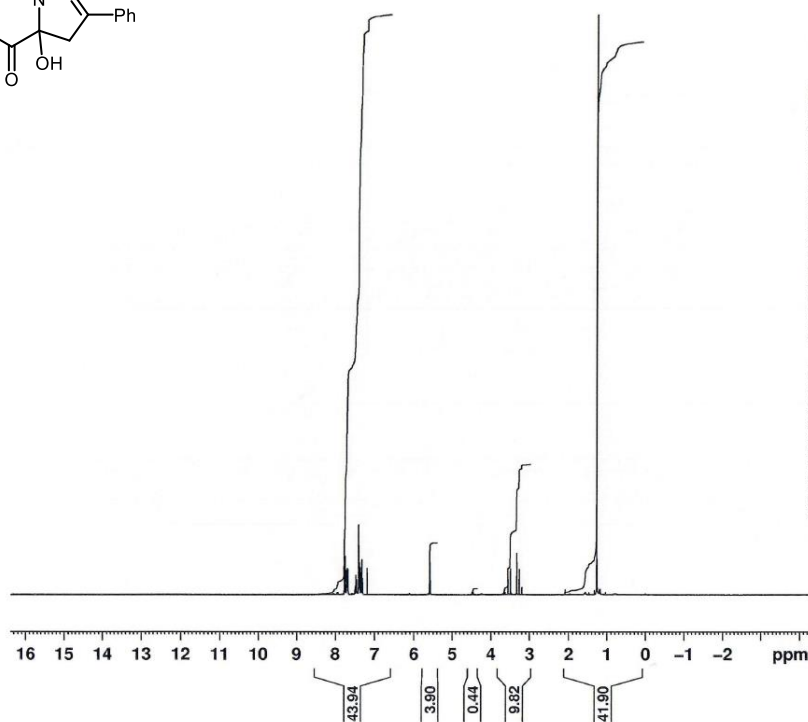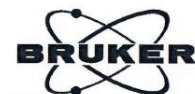

NAME Boersch  
EXPNO 630  
PROCNO 1  
Date\_ 20110819  
Time 7.38  
INSTRUM spect  
PROBHD 5 mm PABBO BB-  
PULPROG zg30  
TD 65536  
SOLVENT CDCl3  
NS 16  
DS 2  
SWH 6188.119 Hz  
FIDRES 0.094423 Hz  
AQ 5.2953587 sec  
RG 71.8  
DW 80.800 usec  
DE 6.50 usec  
TE 298.0 K  
D1 1.00000000 sec  
TDO 1

===== CHANNEL f1 =====  
NUC1 1H  
P1 9.00 usec  
PL1 -2.00 dB  
PL1W 17.95463371 W  
SFO1 300.1318534 MHz  
SI 32768  
SF 300.1300299 MHz  
WDW EM  
SSB 0  
LB 0.30 Hz  
GB 0  
PC 1.00

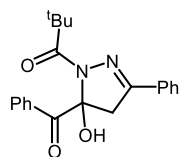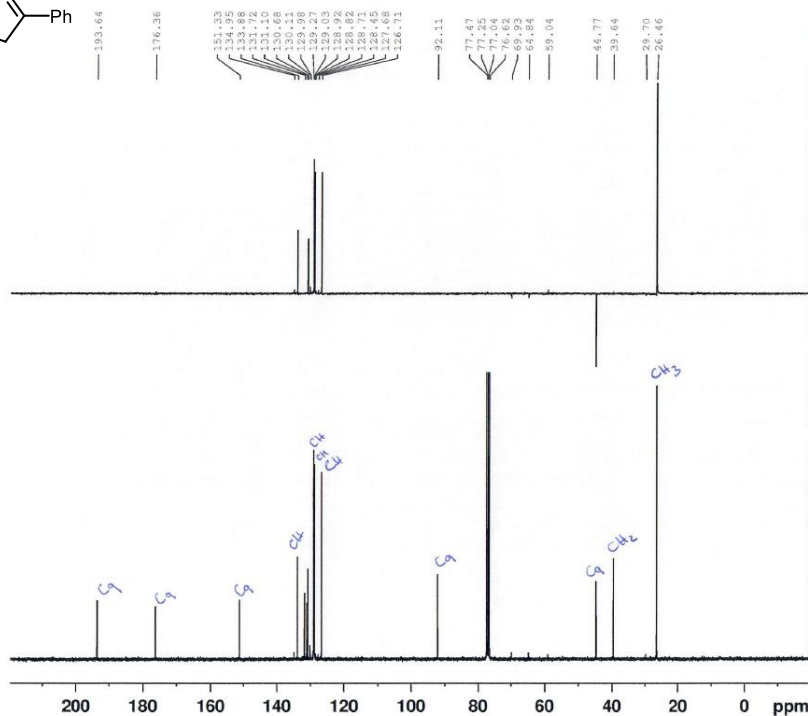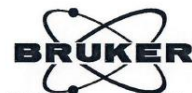

NAME Boersch  
EXPNO 631  
PROCNO 1  
Date\_ 20110819  
Time 9.19  
INSTRUM spect  
PROBHD 5 mm PABBO BB-  
PULPROG zgpg30  
TD 65536  
SOLVENT CDCl3  
NS 1536  
DS 4  
SWH 18028.846 Hz  
FIDRES 0.275098 Hz  
AQ 1.8175818 sec  
RG 2050  
DW 27.733 usec  
DE 6.50 usec  
TE 298.0 K  
D1 2.00000000 sec  
D11 0.03000000 sec  
TDO 1

===== CHANNEL f1 =====  
NUC1 13C  
P1 7.70 usec  
PL1 -3.00 dB  
PL1W 47.86338043 W  
SFO1 75.4752953 MHz  
===== CHANNEL f2 =====  
CPDPRG2 waltz16  
NUC2 1H  
PCPD2 80.00 usec  
PL2 -2.00 dB  
PL12 17.00 dB  
PL13 23.00 dB  
PL2W 17.95463371 W  
PL12W 0.22603545 W  
PL13W 0.05677754 W  
SFO2 300.1312005 MHz  
SI 32768  
SF 75.4677490 MHz  
WDW EM  
SSB 0  
LB 1.00 Hz  
GB 0  
PC 1.40

# 5.11 1-(5-Benzoyl-5-hydroxy-3-phenyl-4,5-dihydro-1H-pyrazol-1-yl)butan-1-one (5k)

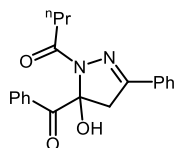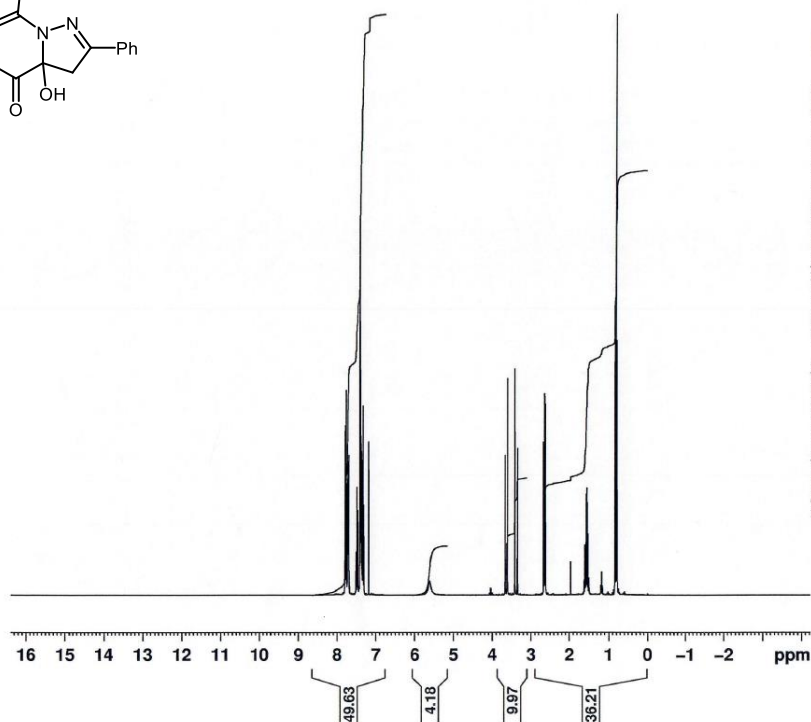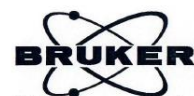

NAME Boersch  
EXPNO 1090  
PROCNO 1  
Date\_ 20120417  
Time 11.09  
INSTRUM spect  
PROBHD 5 mm PABBO BB-  
PULPROG zg30  
TD 65536  
SOLVENT CDCl3  
NS 16  
DS 2  
SWH 6188.119 Hz  
FIDRES 0.094423 Hz  
AQ 5.2953587 sec  
RG 80.6  
DW 80.800 usec  
DE 6.50 usec  
TE 297.0 K  
D1 1.00000000 sec  
TDO 1

===== CHANNEL f1 =====  
NUC1 1H  
P1 9.00 usec  
PL1 -2.00 dB  
PL1W 17.95463371 W  
SFO1 300.1318534 MHz  
SI 32768  
SF 300.1300295 MHz  
WDW EM  
SSB 0  
LB 0.30 Hz  
GB 0  
PC 1.00

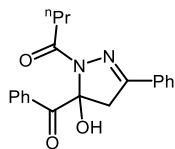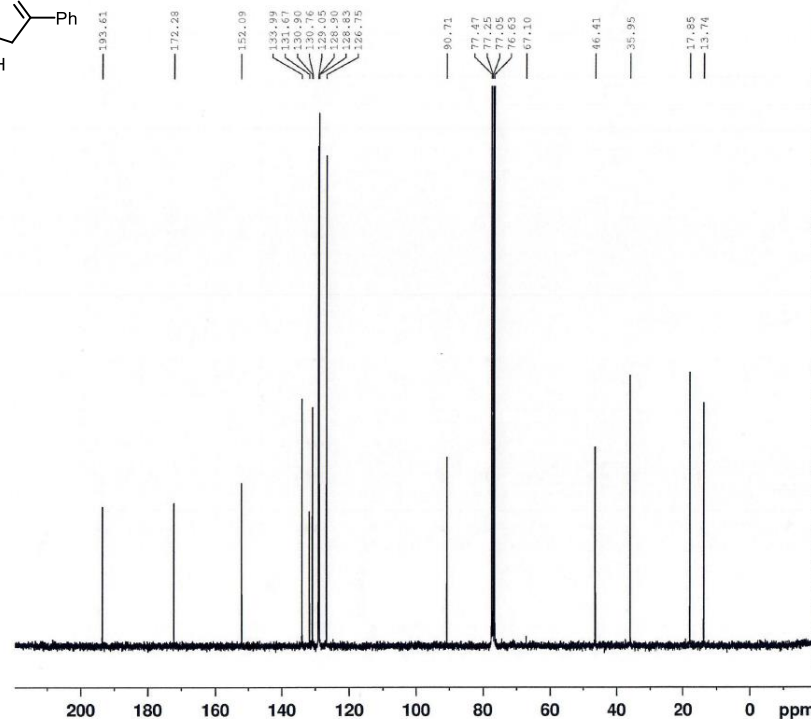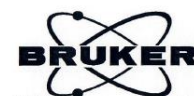

NAME Boersch  
EXPNO 1091  
PROCNO 1  
Date\_ 20120417  
Time 12.50  
INSTRUM spect  
PROBHD 5 mm PABBO BB-  
PULPROG zgpg30  
TD 65536  
SOLVENT CDCl3  
NS 1536  
DS 4  
SWH 18028.846 Hz  
FIDRES 0.275098 Hz  
AQ 1.8175818 sec  
RG 1290  
DW 27.733 usec  
DE 6.50 usec  
TE 297.0 K  
D1 2.00000000 sec  
D11 0.03000000 sec  
TDO 1

===== CHANNEL f1 =====  
NUC1 13C  
P1 7.70 usec  
PL1 -3.00 dB  
PL1W 47.86338043 W  
SFO1 75.4752953 MHz

===== CHANNEL f2 =====  
CPDPRG2 waltz16  
NUC2 1H  
PCPD2 80.00 usec  
PL2 -2.00 dB  
PL12 17.00 dB  
PL13 23.00 dB  
PL2W 17.95463371 W  
PL12W 0.22603545 W  
PL13W 0.05677754 W  
SFO2 300.1312005 MHz  
SI 32768  
SF 75.4677490 MHz  
WDW EM  
SSB 0  
LB 1.00 Hz  
GB 0  
PC 1.40

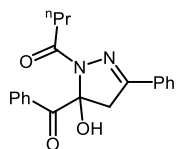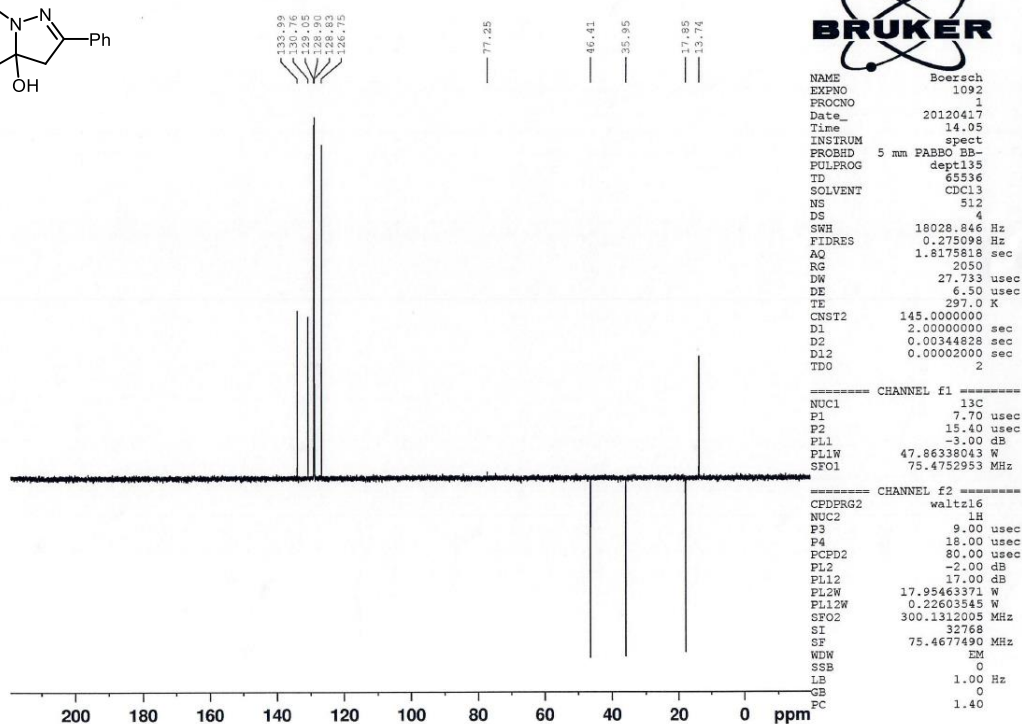

# 5.12 (5-Hydroxy-3-(4-methoxyphenyl)-4,5-dihydro-1H-pyrazol-1,5-diyl)bis(phenylmethanone) (5I)

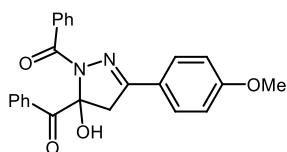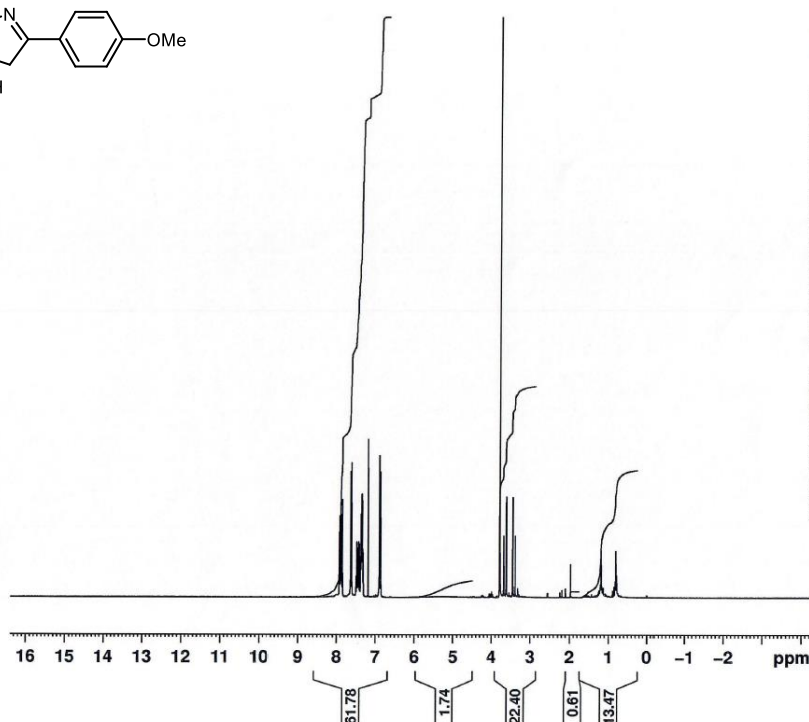

**BRUKER**

|         |                |
|---------|----------------|
| NAME    | Boersch        |
| EXPNO   | 1070           |
| PROCNO  | 1              |
| Date_   | 20120410       |
| Time    | 17.22          |
| INSTRUM | spect          |
| PROBHD  | 5 mm PABBO BB- |
| PULPROG | zg30           |
| TD      | 65536          |
| SOLVENT | CDCl3          |
| NS      | 16             |
| DS      | 2              |
| SWH     | 6188.119 Hz    |
| FIDRES  | 0.094423 Hz    |
| AQ      | 5.2953587 sec  |
| RG      | 161            |
| DW      | 80.800 usec    |
| DE      | 6.50 usec      |
| TE      | 297.0 K        |
| D1      | 1.00000000 sec |
| TD0     | 1              |

===== CHANNEL f1 =====

|      |                 |
|------|-----------------|
| NUC1 | 1H              |
| P1   | 9.00 usec       |
| PL1  | -2.00 dB        |
| PL1W | 17.95463371 W   |
| SFO1 | 300.1318534 MHz |
| SI   | 32768           |
| SF   | 300.1300293 MHz |
| WDW  | EM              |
| SSB  | 0               |
| LB   | 0.30 Hz         |
| GB   | 0               |
| PC   | 1.00            |

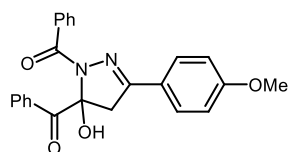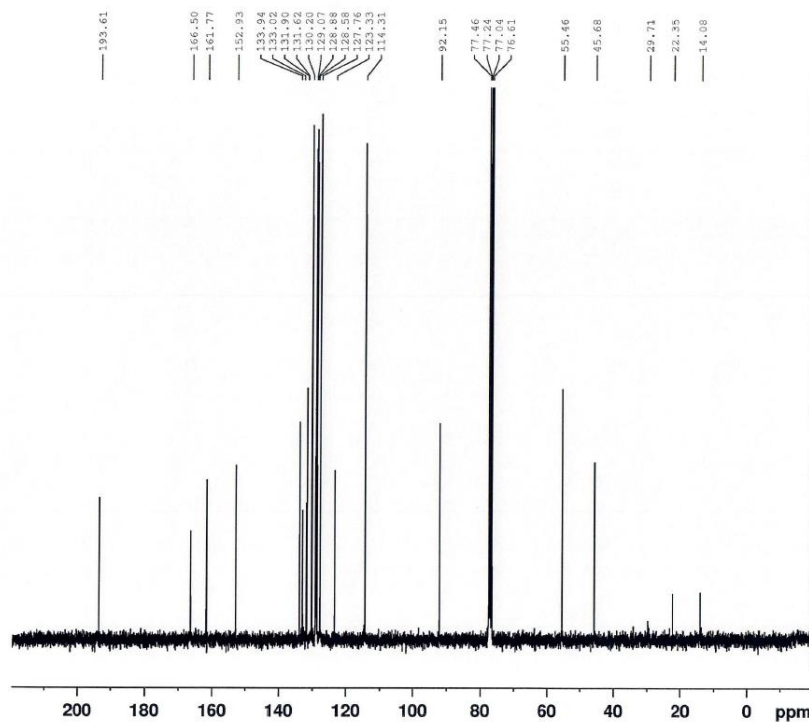

**BRUKER**

|         |                |
|---------|----------------|
| NAME    | Boersch        |
| EXPNO   | 1071           |
| PROCNO  | 1              |
| Date_   | 20120410       |
| Time    | 18.31          |
| INSTRUM | spect          |
| PROBHD  | 5 mm PABBO BB- |
| PULPROG | zgpg30         |
| TD      | 65536          |
| SOLVENT | CDCl3          |
| NS      | 2048           |
| DS      | 4              |
| SWH     | 18028.846 Hz   |
| FIDRES  | 0.275098 Hz    |
| AQ      | 1.8175818 sec  |
| RG      | 1290           |
| DW      | 27.733 usec    |
| DE      | 6.50 usec      |
| TE      | 297.0 K        |
| D1      | 2.00000000 sec |
| D11     | 0.03000000 sec |
| TD0     | 2              |

===== CHANNEL f1 =====

|      |                |
|------|----------------|
| NUC1 | 13C            |
| P1   | 7.70 usec      |
| PL1  | -3.00 dB       |
| PL1W | 47.86338043 W  |
| SFO1 | 75.4752953 MHz |

===== CHANNEL f2 =====

|         |                 |
|---------|-----------------|
| CPDPRG2 | waltz16         |
| NUC2    | 1H              |
| PCPD2   | 80.00 usec      |
| PL2     | -2.00 dB        |
| PL12    | 17.00 dB        |
| PL13    | 23.00 dB        |
| PL2W    | 17.95463371 W   |
| PL12W   | 0.22603545 W    |
| PL13W   | 0.05677754 W    |
| SFO2    | 300.1312005 MHz |
| SI      | 32768           |
| SF      | 75.4677490 MHz  |
| WDW     | EM              |
| SSB     | 0               |
| LB      | 1.00 Hz         |
| GB      | 0               |
| PC      | 1.40            |

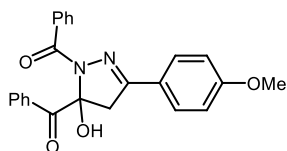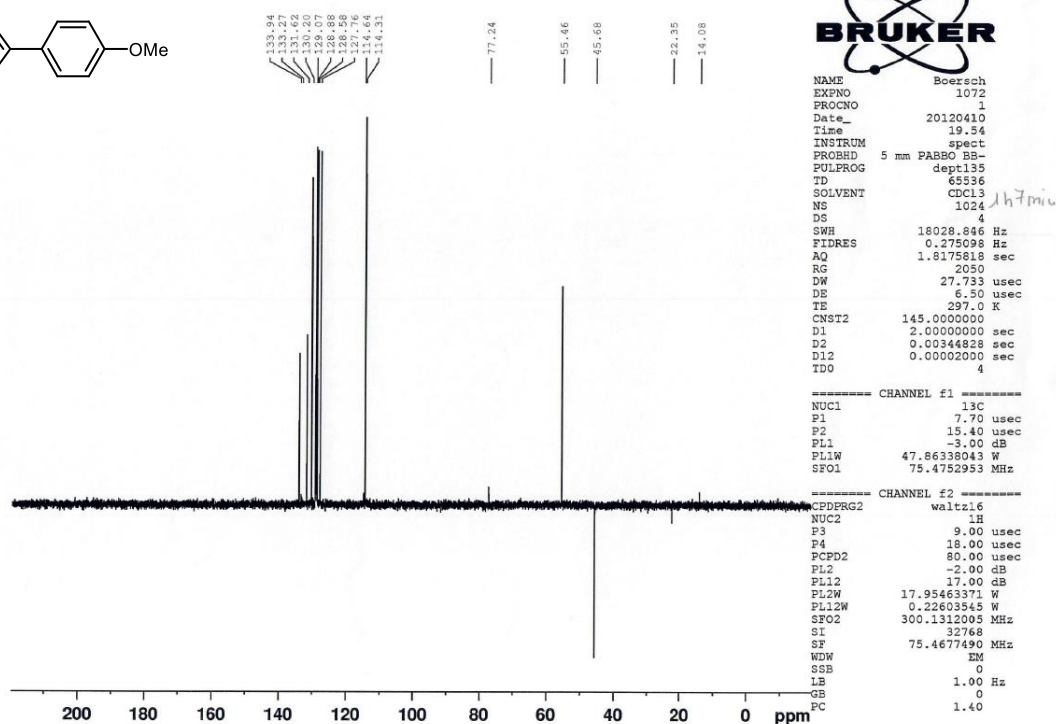

O=C1C(=O)N2C(=O)C(=O)N2C1Cc1ccc(C)cc1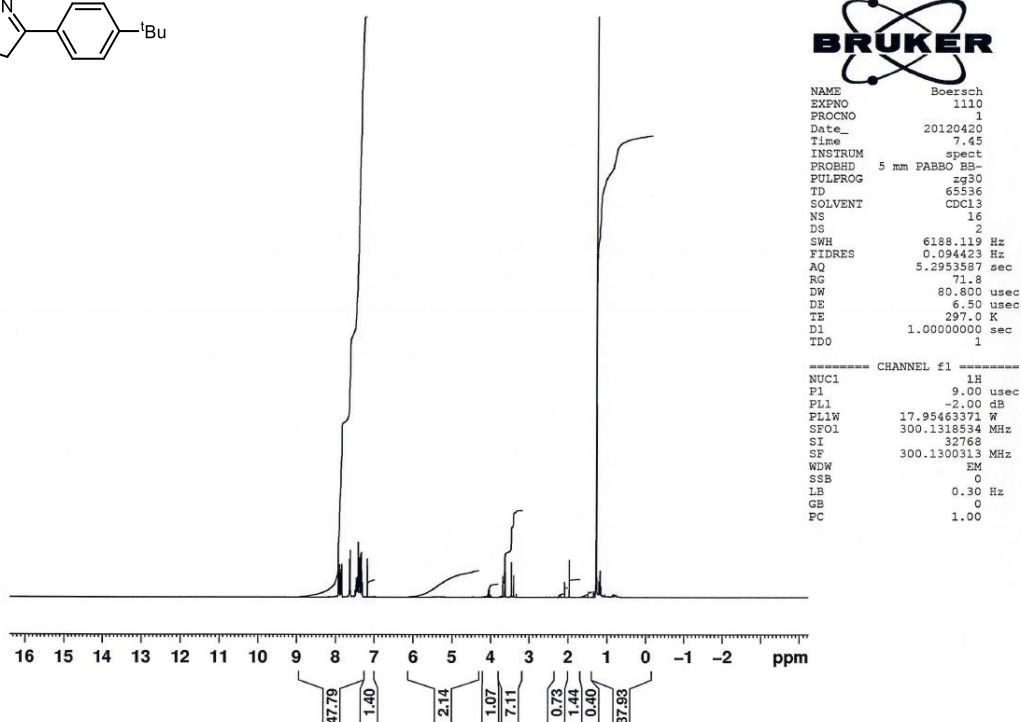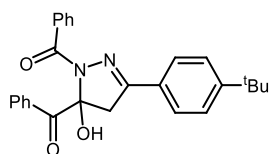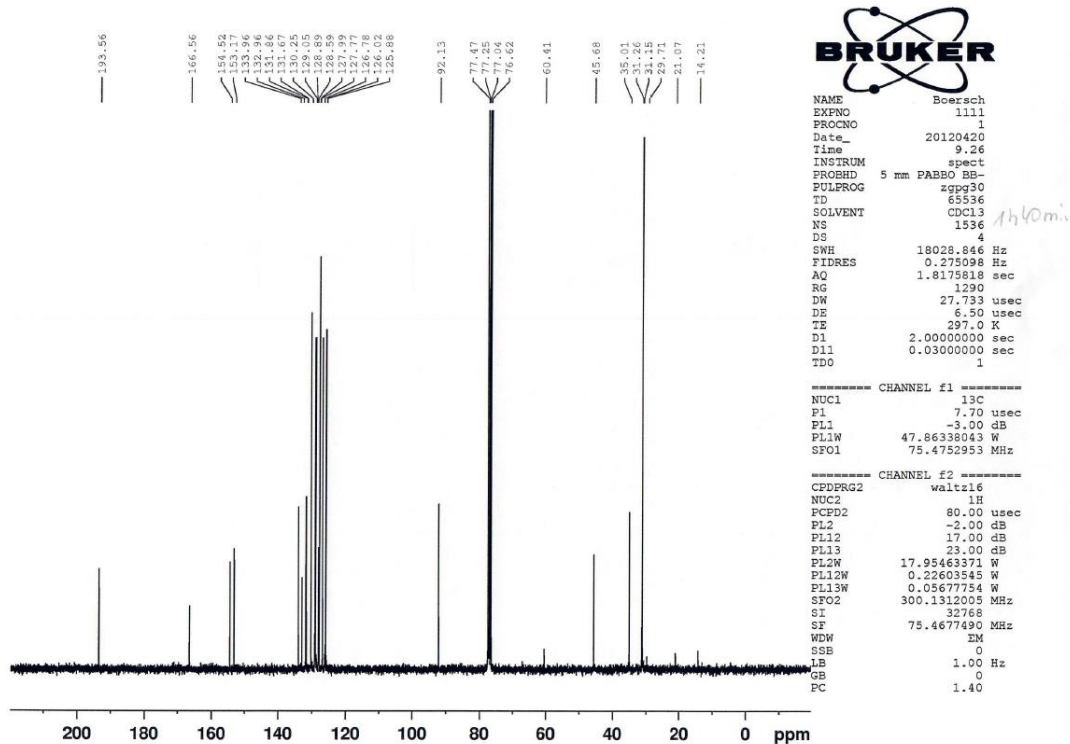



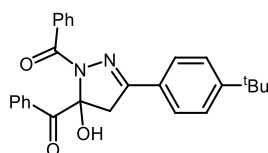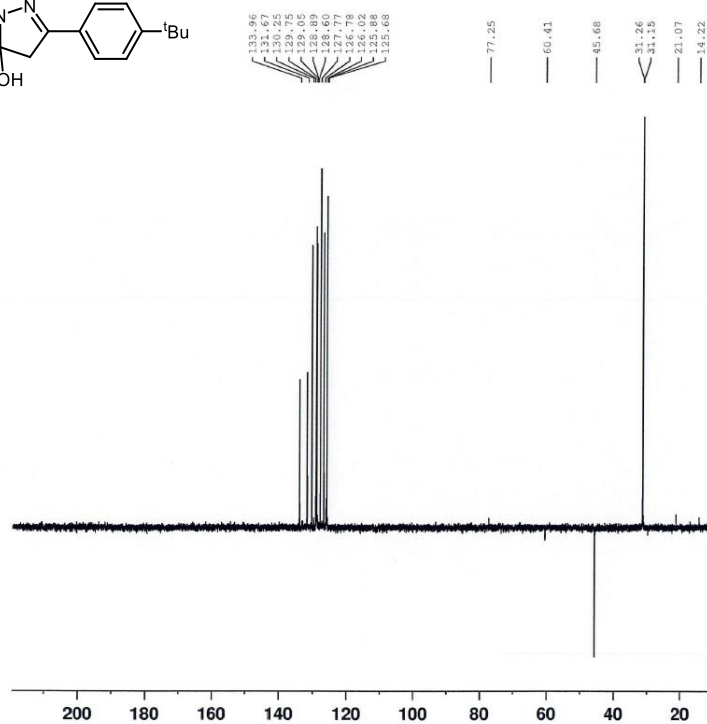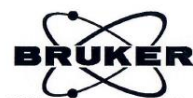

```

NAME      Boersch
EXPNO     1112
PROCNO    1
Date_     20120420
Time      9.43
INSTRUM   spect
PROBHD    5 mm PABBO BB-
PULPROG   dept135
TD         65536
SOLVENT   CDCl3
NS         512
DS         4
SWH        18028.846 Hz
FIDRES     0.275098 Hz
AQ         1.8175818 sec
RG         2050
DW         27.733 usec
DE         6.50 usec
TE         297.0 K
CNST2     145.000000
D1         2.00000000 sec
D2         0.00344828 sec
D12        0.00002000 sec
TD0        2

===== CHANNEL f1 =====
NUC1       13C
P1         7.70 usec
P2         15.40 usec
PL1        -3.00 dB
PL1W       47.86338043 W
SFO1       75.4752953 MHz

===== CHANNEL f2 =====
CPDPRG2    waltz16
NUC2       1H
P3         9.00 usec
P4         18.00 usec
PCPD2      80.00 usec
PL2        -2.00 dB
PL12       17.00 dB
PL2W       17.95463371 W
PL12W      0.22603545 W
SFO2       300.1312005 MHz
SI         32768
SF         75.4677490 MHz
WDW        EM
SSB        0
LB         1.00 Hz
GB         0
PC         1.40

```



# 5.14 (3-(4-Fluorophenyl)-5-hydroxy-4,5-dihydro-1H-pyrazol-1,5-diyl)bis(phenylmethanone) (5n)

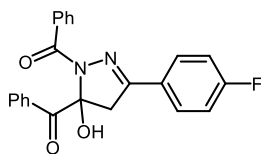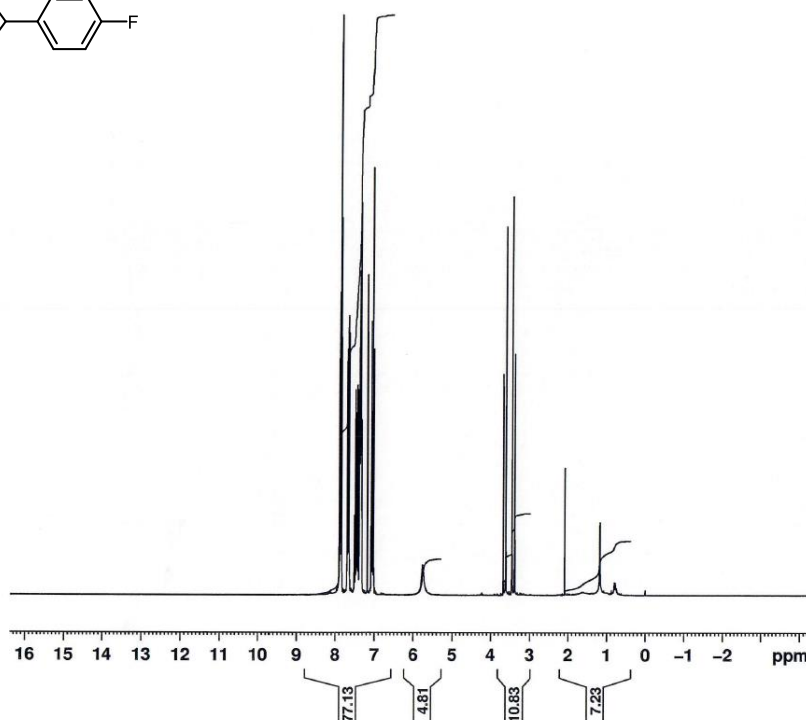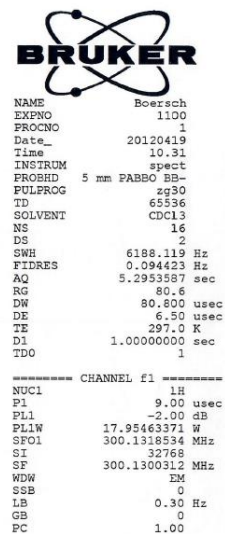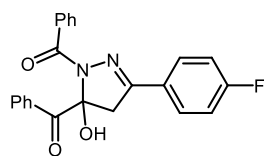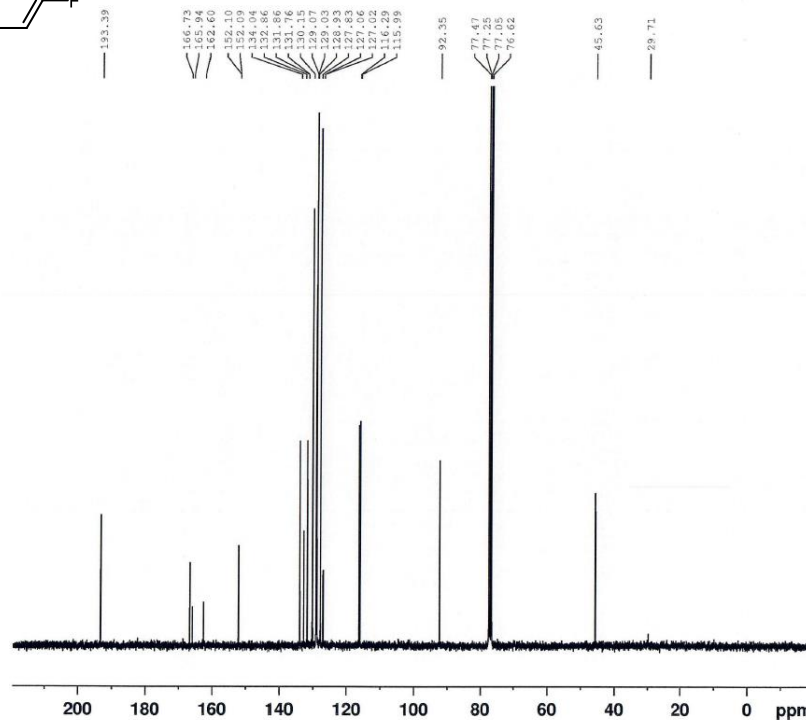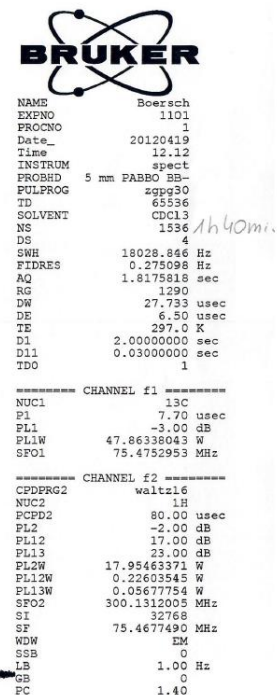

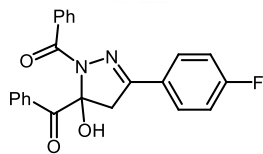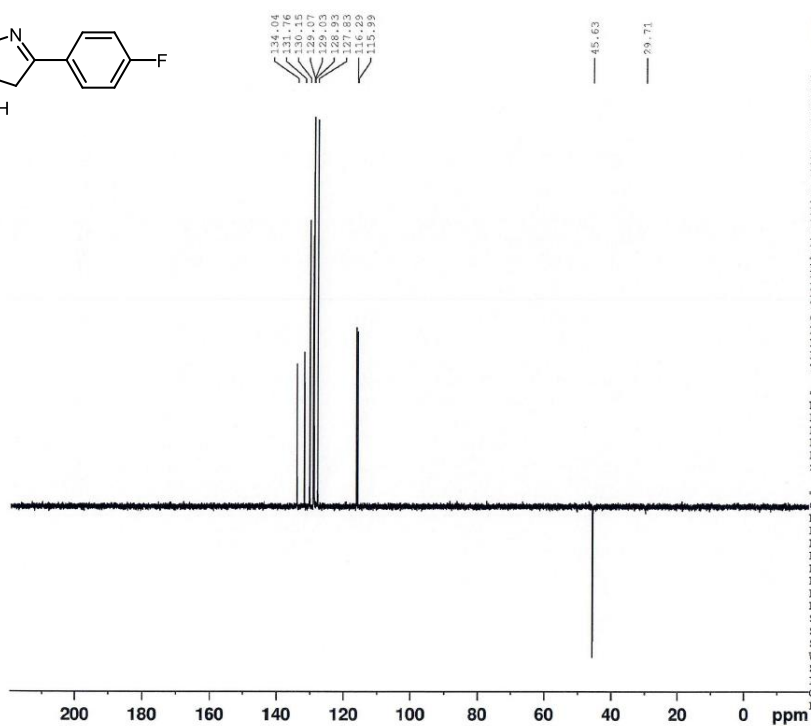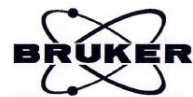

```

NAME      Boersch
EXPNO     1102
PROCNO    1
Date_     20120419
Time      13.04
INSTRUM   spect
PROBHD    5 mm PABBO BB-
PULPROG   dept135
TD         65536
SOLVENT   CDCl3
NS         512
DS         4
SWH        18028.846 Hz
FIDRES     0.275098 Hz
AQ         1.8175818 sec
RG         2050
DW         27.733 usec
DE         6.50 usec
TE         297.0 K
CNST2     145.000000
D1         2.00000000 sec
D2         0.00344828 sec
D12        0.00002000 sec
TD0        2

===== CHANNEL f1 =====
NUC1       13C
P1         7.70 usec
P2         15.40 usec
PL1        -3.00 dB
PL1W       47.86338043 W
SFO1       75.4752953 MHz

===== CHANNEL f2 =====
CPDPRG2   waltz16
NUC2       1H
P3         9.00 usec
P4         18.00 usec
PCPD2     80.00 usec
PL2        -2.00 dB
PL12       17.00 dB
PL2W       17.95463371 W
PL12W      0.22603543 W
SFO2       300.1312005 MHz
SI         32768
SF         75.4677490 MHz
WDW        EM
SSB        0
LB         1.00 Hz
GB         0
PC         1.40

```

# 5.15 4-(1,5-Dibenzoyl-5-hydroxy-4,5-dihydro-1H-pyrazol-3-yl)benzonitrile (5o)

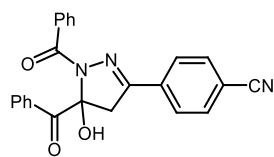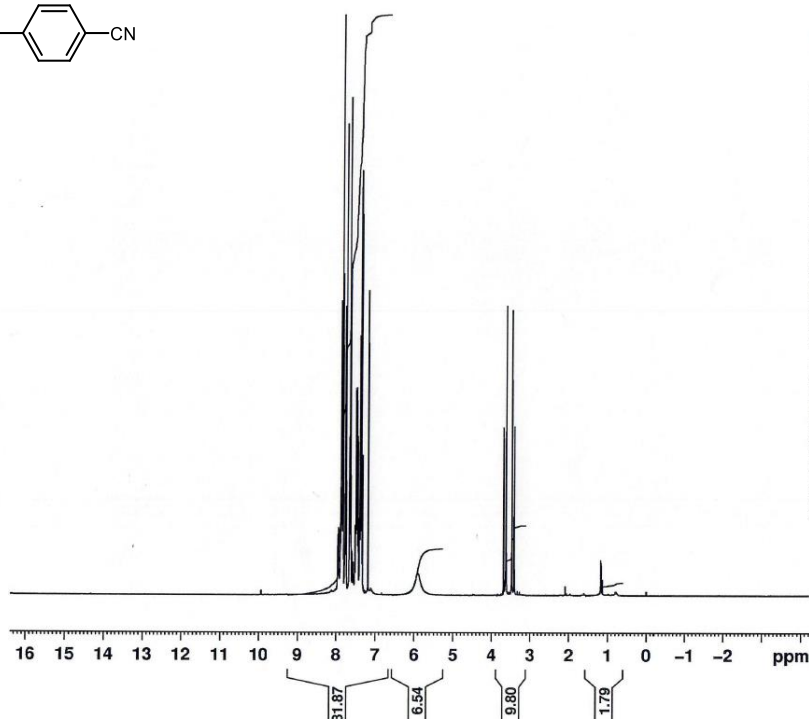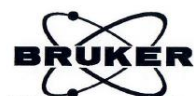

```

NAME      Boersch
EXPNO     1120
PROCNO    1
Date_     20120426
Time      15.37
INSTRUM   spect
PROBHD    5 mm PABBO BB-
PULPROG   zg30
TD         65536
SOLVENT   CDCl3
NS         16
DS         2
SWH        6188.119 Hz
FIDRES     0.094423 Hz
AQ         5.2953587 sec
RG         90.5
DW         80.800 usec
DE         6.50 usec
TE         297.0 K
D1         1.00000000 sec
TD0        1
  
```

```

===== CHANNEL f1 =====
NUC1      1H
P1         9.00 usec
PL1        -2.00 dB
PL1W      17.95463371 W
SFO1      300.1318534 MHz
SI         32768
SF        300.1300295 MHz
WDW        EM
SFB         0
LB         0.30 Hz
GB         0
PC         1.00
  
```

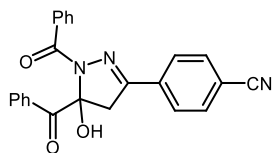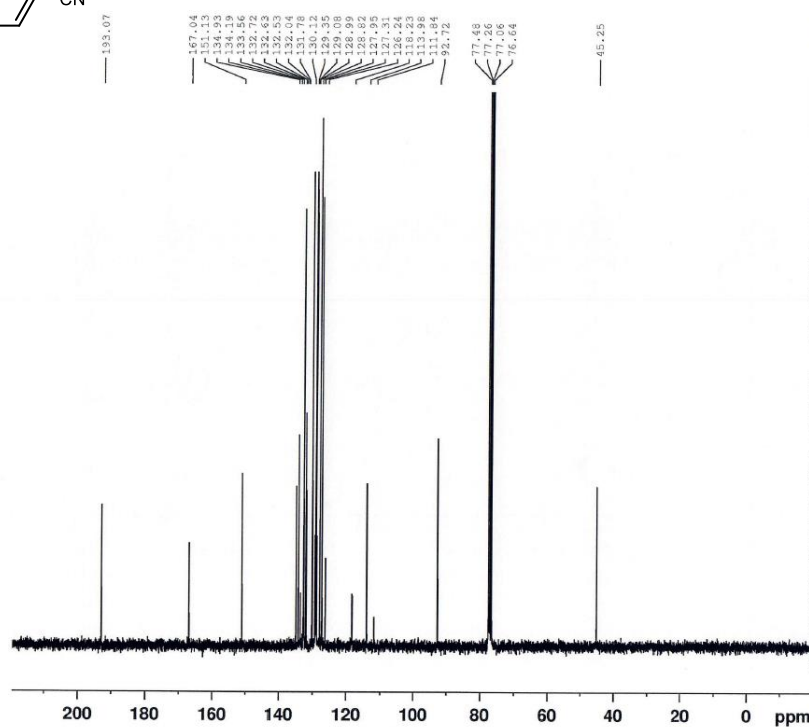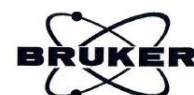

```

NAME      Boersch
EXPNO     1121
PROCNO    1
Date_     20120426
Time      17.18
INSTRUM   spect
PROBHD    5 mm PABBO BB-
PULPROG   zgpg30
TD         65536
SOLVENT   CDCl3
NS         1536
DS         4
SWH        18028.846 Hz
FIDRES     0.275098 Hz
AQ         1.8175818 sec
RG         1620
DW         27.733 usec
DE         6.50 usec
TE         297.0 K
D1         2.00000000 sec
D11        0.03000000 sec
TD0        1
  
```

```

===== CHANNEL f1 =====
NUC1      13C
P1         7.70 usec
PL1        -3.00 dB
PL1W      47.86338043 W
SFO1      75.4752953 MHz
  
```

```

===== CHANNEL f2 =====
CPDPRG2   waltz16
NUC2      1H
PCPD2     80.00 usec
PL2        -2.00 dB
PL12       17.00 dB
PL13       23.00 dB
PL2W      17.95463371 W
PL12W     0.22603545 W
PL13W     0.05677754 W
SFO2      300.1312005 MHz
SI         32768
SF        75.4677490 MHz
WDW        EM
SFB         0
LB         1.00 Hz
GB         0
PC         1.40
  
```

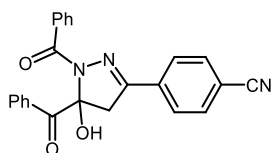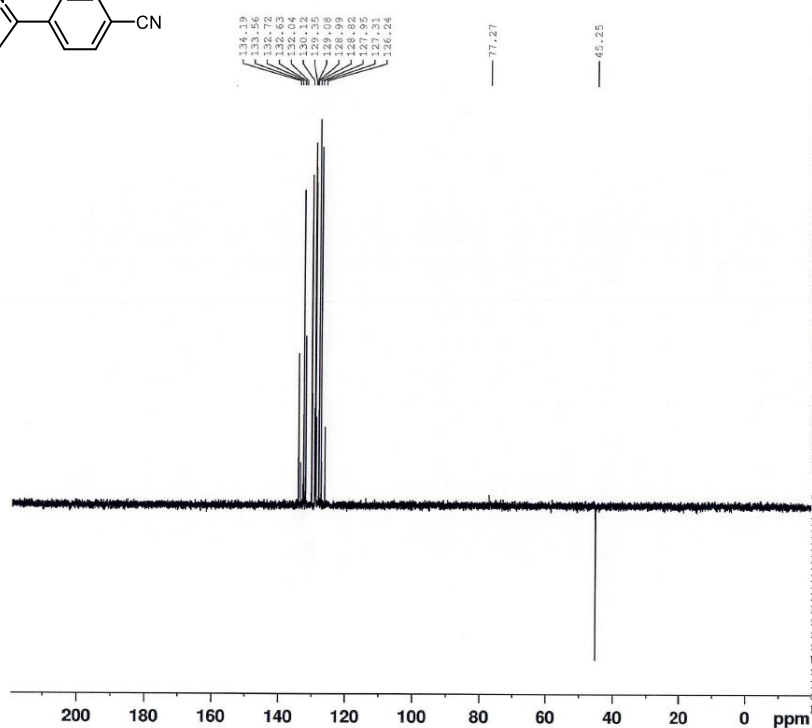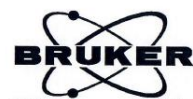

NAME Boersch  
EXPNO 1122  
PROCNO 1  
Date 20120426  
Time 17.35  
INSTRUM spect  
PROBHD 5 mm PABBO BB-  
PULPROG dept135  
TD 65536  
SOLVENT CDCl3  
NS 512  
DS 4  
SWH 18028.846 Hz  
FIDRES 0.275098 Hz  
AQ 1.8175818 sec  
RG 2050  
DM 27.793 usec  
DE 6.50 usec  
TE 297.0 K  
CNST2 145.0000000  
D1 2.00000000 sec  
D2 0.00344828 sec  
D12 0.00002000 sec  
TDO 2

===== CHANNEL f1 =====  
NUC1 13C  
P1 7.70 usec  
P2 15.40 usec  
PL1 -3.00 dB  
PL1W 47.86338043 W  
SFO1 75.4752953 MHz

===== CHANNEL f2 =====  
CPDPRG2 waitz16  
NUC2 1H  
P3 9.00 usec  
P4 18.00 usec  
PCPD2 80.00 usec  
PL2 -2.00 dB  
PL12 17.00 dB  
PL2W 17.95463371 W  
PL12W 0.22603545 W  
SFO2 300.1312009 MHz  
SI 32768  
SF 75.4677490 MHz  
WDW EM  
SSB 0  
LB 1.00 Hz  
GB 0  
PC 1.40

**5.16 (1-Benzoyl-5-hydroxy-3-phenyl-4,5-dihydro-1H-pyrazol-5-yl)(mesityl)methanone (5p)**

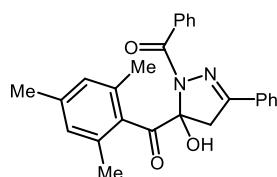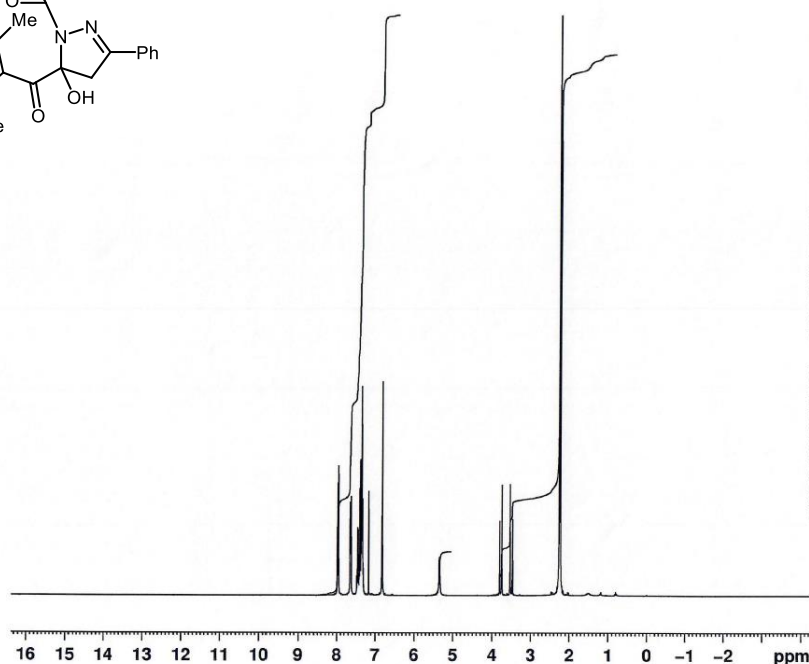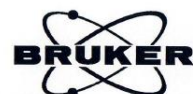

NAME Boersch  
EXPNO 1050  
PROCNO 1  
Date\_ 20120324  
Time 11.17  
INSTRUM spect  
PROBHD 5 mm PABBO BB-  
F1LW 2930  
TD 65536  
SOLVENT CDCl3  
NS 16  
DS 2  
SWH 6188.119 Hz  
FIDRES 0.094423 Hz  
AQ 5.2953587 sec  
RG 114  
DW 80.800 usec  
DE 6.50 usec  
TE 298.0 K  
D1 1.00000000 sec  
TDO 1

===== CHANNEL f1 =====  
NUC1 1H  
P1 9.00 usec  
PL1 -2.00 dB  
PL1W 17.95463371 W  
SFO1 300.1318534 MHz  
SI 32768  
SF 300.1300331 MHz  
WDW EM  
SSB 0  
LB 0.30 Hz  
GB 0  
PC 1.00

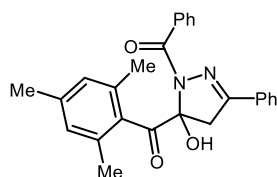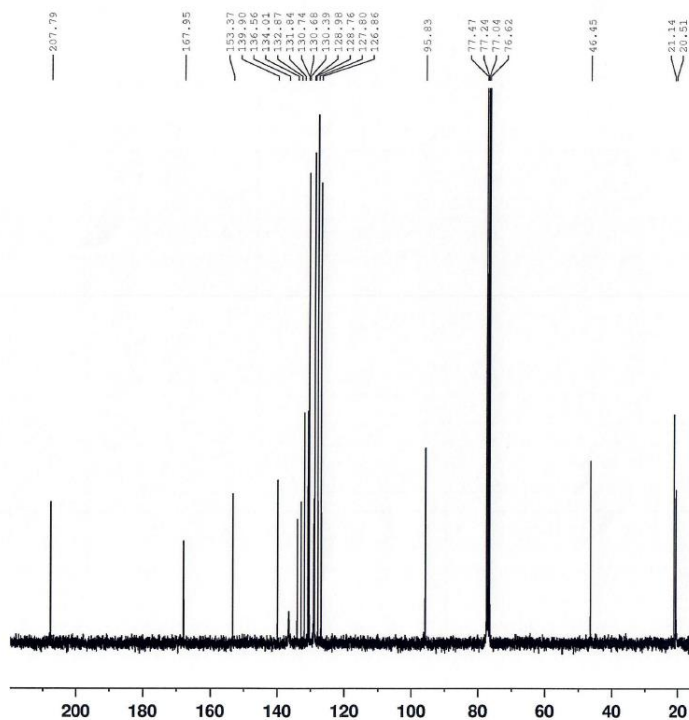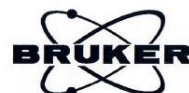

NAME Boersch  
EXPNO 1051  
PROCNO 1  
Date\_ 20120324  
Time 12.25  
INSTRUM spect  
PROBHD 5 mm PABBO BB-  
F1LW 2930  
TD 65536  
SOLVENT CDCl3  
NS 1024  
DS 4  
SWH 18028.846 Hz  
FIDRES 0.275098 Hz  
AQ 1.8175818 sec  
RG 1150  
DW 27.733 usec  
DE 6.50 usec  
TE 298.0 K  
D1 2.00000000 sec  
D11 0.03000000 sec  
TDO 1

===== CHANNEL f1 =====  
NUC1 13C  
P1 7.70 usec  
PL1 -3.00 dB  
PL1W 47.86338043 W  
SFO1 75.4752953 MHz

===== CHANNEL f2 =====  
CPDPRG2 waltz16  
NUC2 1H  
PCPD2 80.00 usec  
PL2 -2.00 dB  
PL12 17.00 dB  
PL13 23.00 dB  
PL2W 17.95463371 W  
PL12W 0.22603545 W  
PL13W 0.05677754 W  
SFO2 300.1312005 MHz  
SI 32768  
SF 75.4677490 MHz  
WDW EM  
SSB 0  
LB 1.00 Hz  
GB 0  
PC 1.40

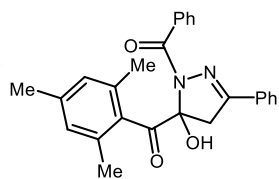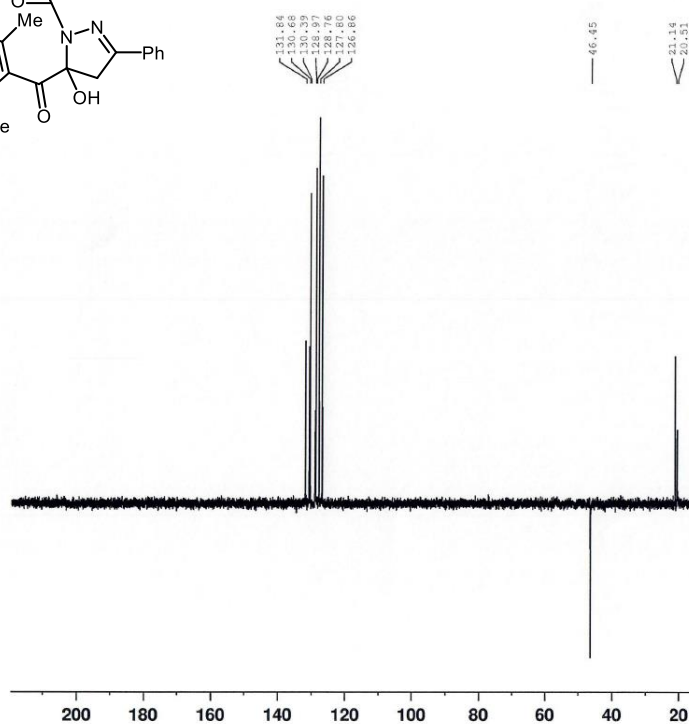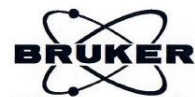

NAME Boersch  
EXPNO 1052  
PROCNO 1  
Date\_ 20120324  
Time 12.42  
INSTRUM spect  
PROBHD 5 mm PABBO BB-  
PULPROG dept135  
TD 65536  
SOLVENT CDCl3  
NS 256  
DS 4  
SWH 18028.846 Hz  
FIDRES 0.275098 Hz  
AQ 1.8175818 sec  
RG 2050  
DW 27.733 usec  
DE 6.50 usec  
TE 298.0 K  
CNST2 145.0000000  
D1 2.00000000 sec  
D2 0.00344828 sec  
D12 0.00002000 sec  
TD0 1

===== CHANNEL f1 =====  
NUC1 13C  
P1 7.70 usec  
P2 15.40 usec  
PL1 -3.00 dB  
PL1W 47.86338043 W  
SFO1 75.4752953 MHz

===== CHANNEL f2 =====  
CPDPRG2 waltz16  
NUC2 1H  
P3 9.00 usec  
P4 18.00 usec  
PCPD2 80.00 usec  
PL2 -2.00 dB  
PL12 17.00 dB  
PL2W 17.95463371 W  
PL12W 0.22603545 W  
SFO2 300.1312005 MHz  
SI 32768  
SF 75.4677490 MHz  
WDW EM  
SSB 0  
LB 1.00 Hz  
GB 0  
PC 1.40

5.17 (1-Benzoyl-5-hydroxy-3-phenyl-4,5-dihydro-1H-pyrazol-5-yl)(thien-2-yl)methanone (5q)

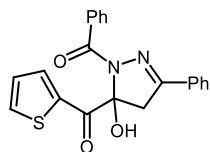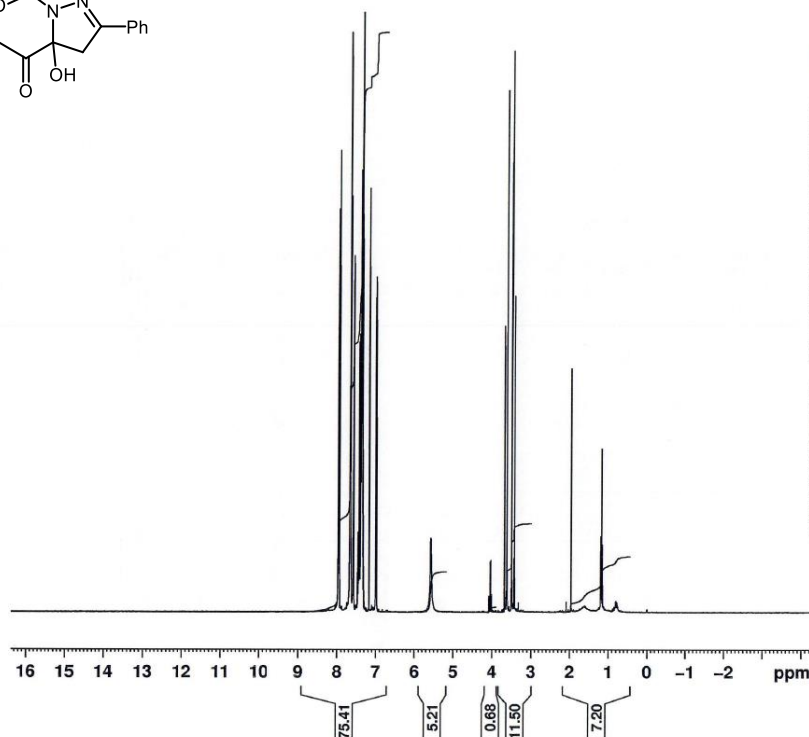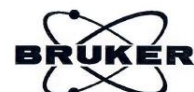

NAME Boersch  
EXPNO 970  
PROCNO 1  
Date\_ 20120229  
Time 5.13  
INSTRUM spect  
PROBHD 5 mm PABBO BB-  
PULPROG zg30  
TD 65536  
SOLVENT CDCl3  
NS 16  
DS 2  
SWH 6188.119 Hz  
FIDRES 0.094423 Hz  
AQ 5.2953587 sec  
RG 128  
DW 80.800 usec  
DE 6.50 usec  
TE 298.0 K  
D1 1.0000000 sec  
TD0 1

===== CHANNEL f1 =====  
NUC1 1H  
P1 9.00 usec  
PL1 -2.00 dB  
PL1W 17.95463371 W  
SFO1 300.1318534 MHz  
SI 32768  
SF 300.1300313 MHz  
WDW EM  
SSB 0  
LB 0.30 Hz  
GB 0  
PC 1.00

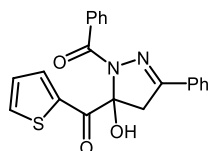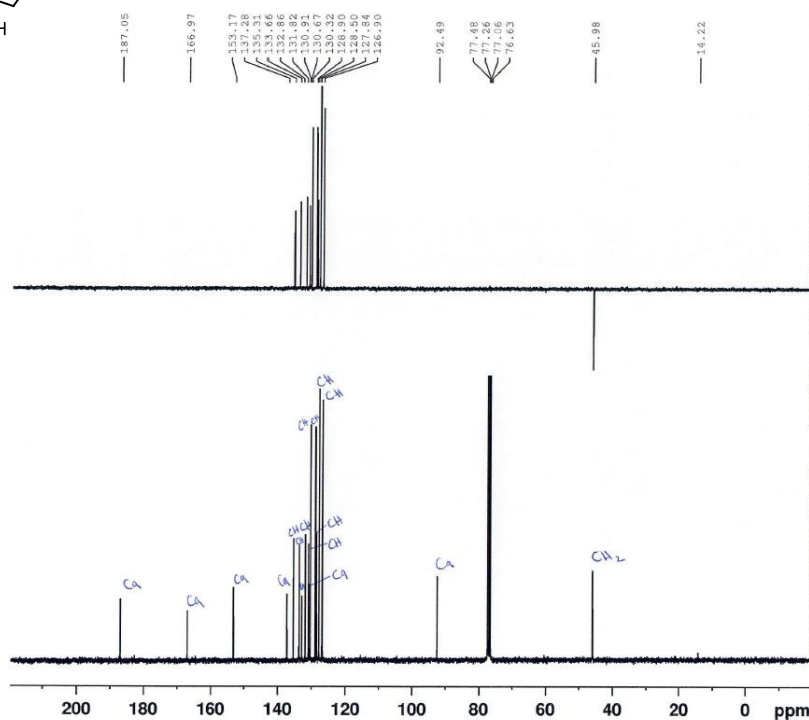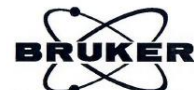

NAME Boersch  
EXPNO 971  
PROCNO 1  
Date\_ 20120229  
Time 6.21  
INSTRUM spect  
PROBHD 5 mm PABBO BB-  
PULPROG zgpg30  
TD 65536  
SOLVENT CDCl3  
NS 1024  
DS 4  
SWH 18028.846 Hz  
FIDRES 0.275098 Hz  
AQ 1.8175818 sec  
RG 1030  
DW 27.733 usec  
DE 6.50 usec  
TE 298.0 K  
D1 2.0000000 sec  
D11 0.0300000 sec  
TD0 1

===== CHANNEL f1 =====  
NUC1 13C  
P1 7.70 usec  
PL1 -3.00 dB  
PL1W 47.86338043 W  
SFO1 75.4752953 MHz

===== CHANNEL f2 =====  
CPDPRG2 waltz16  
NUC2 1H  
PCPD2 80.00 usec  
PL2 -2.00 dB  
PL12 17.00 dB  
PL13 23.00 dB  
PL12W 17.95463371 W  
PL13W 0.22603545 W  
PL13W 0.05677754 W  
SFO2 300.1312005 MHz  
SI 32768  
SF 75.4677490 MHz  
WDW EM  
SSB 0  
LB 1.00 Hz  
GB 0  
PC 1.40



**5.18 (5-Hydroxy-3-(4-methoxyphenyl)-1-(thiophen-2-carbonyl)-4,5-dihydro-1H-pyrazol-5-yl) (mesityl)methanone (5r)**

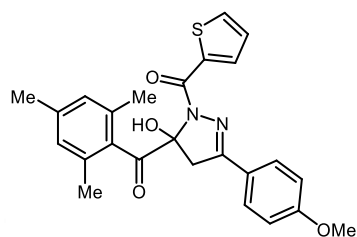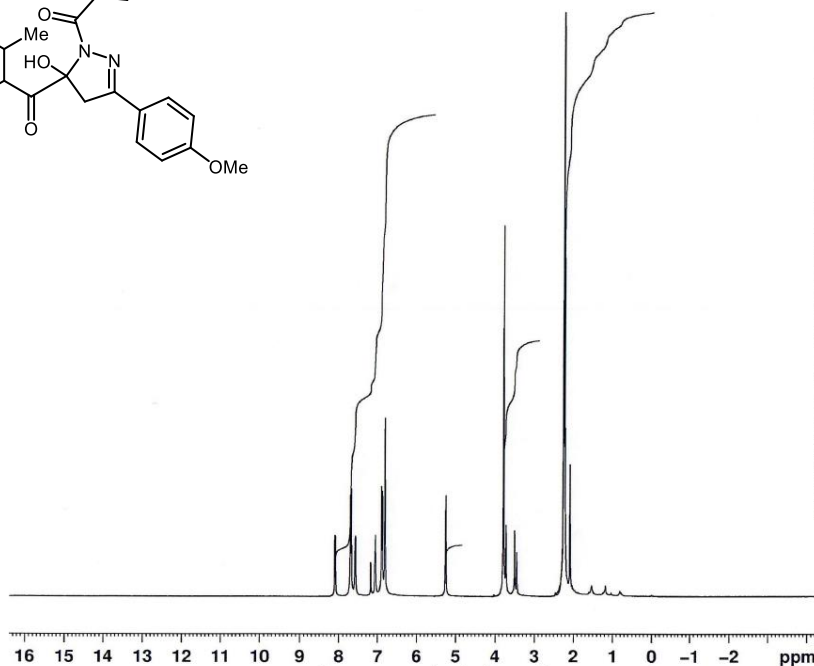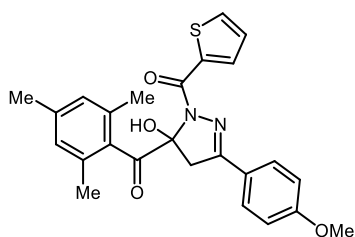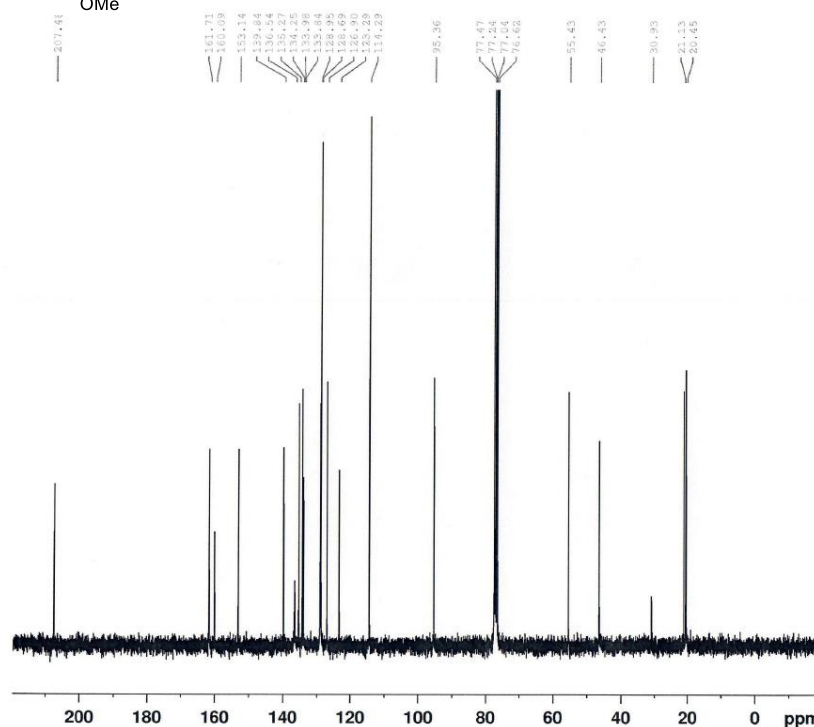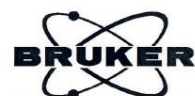

NAME Boersch  
EXPNO 1380  
PROCNO 1  
Date\_ 20121122  
Time 12.30  
INSTRUM spect  
PROBHD 5 mm PABBO BB-  
PULPROG zgpg30  
TD 65536  
SOLVENT CDCl3  
NS 16  
DS 2  
SWH 6188.112 Hz  
FIDRES 0.094423 Hz  
AQ 5.2953587 sec  
RG 114  
DW 80.800 usec  
DE 6.50 usec  
TE 298.0 K  
D1 1.0000000 sec  
TD0 1

===== CHANNEL f1 =====  
NUC1 1H  
P1 9.00 usec  
PL1 -2.00 dB  
PL1W 17.95463371 W  
SFO1 300.1318534 MHz  
SI 32768  
SF 300.1300310 MHz  
WDW EM  
SSB 0  
LB 0.30 Hz  
GB 0  
PC 1.00

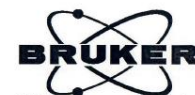

NAME Boersch  
EXPNO 1381  
PROCNO 1  
Date\_ 20121122  
Time 14.10  
INSTRUM spect  
PROBHD 5 mm PABBO BB-  
PULPROG zgpg30  
TD 65536  
SOLVENT CDCl3  
NS 1536  
DS 4  
SWH 18028.846 Hz  
FIDRES 0.275098 Hz  
AQ 1.8175818 sec  
RG 2050  
DW 27.733 usec  
DE 6.50 usec  
TE 298.0 K  
D1 2.0000000 sec  
D11 0.0300000 sec  
TD0 1

===== CHANNEL f1 =====  
NUC1 13C  
P1 7.70 usec  
PL1 -3.00 dB  
PL1W 47.86338043 W  
SFO1 75.4752953 MHz

===== CHANNEL f2 =====  
CPDPRG2 waltz16  
NUC2 1H  
PCPD2 80.00 usec  
PL2 -2.00 dB  
PL12 17.00 dB  
PL13 23.00 dB  
PL1W 17.95463371 W  
PL12W 0.22603545 W  
PL13W 0.05677754 W  
SFO2 300.1312005 MHz  
SI 32768  
SF 75.4677490 MHz  
WDW EM  
SSB 0  
LB 1.00 Hz  
GB 0  
PC 1.40



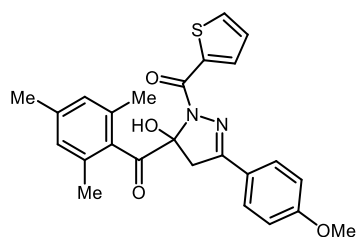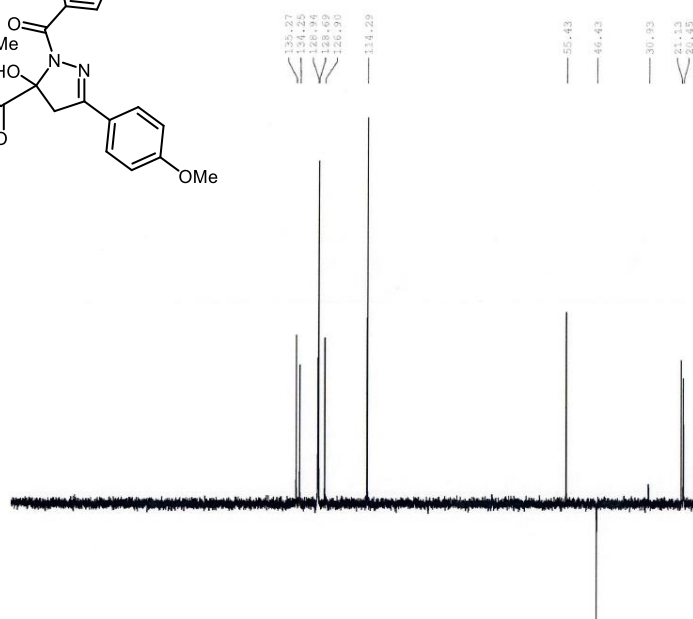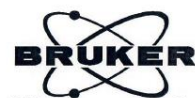

```

NAME      Beersch
EXPNO     1382
PROCNO    1
Date_     20121122
Time      14.27
INSTRUM   spect
PROBHD    5 mm PABBO BBO
PULPROG   dept135
TD         65536
SOLVENT   CDCl3
NS         512
DS         4
SWH        18028.846 Hz
FIDRES     0.275098 Hz
AQ         1.8175818 sec
RG         2030
DW         27.733 usec
DE         6.50 usec
TE         298.0 K
CNST2     145.0000000
D1         2.00000000 sec
D2         0.0034828 sec
D12        0.00002000 sec
TDO        2

===== CHANNEL f1 =====
NUC1       13C
P1         7.70 usec
P2         15.40 usec
PL1        -3.00 dB
PL1W       47.86338043 W
SFO1       75.4752953 MHz

===== CHANNEL f2 =====
CPDPRG2    waltz16
NUC2       1H
P3         9.00 usec
P4         18.00 usec
PCPD2      80.00 usec
PL2        -2.00 dB
PL12       17.00 dB
PL2W       17.95463371 W
PL12W      0.22603545 W
SFO2       400.141995 MHz
  
```

## 6 Crystal structures of compounds **5a**, **5r**, and **6a**

All studied crystals were selected directly from a representative sample of the compound. For the data collection the crystal was glued on a thin glass thread. Diffraction data collection for **5a** was performed using the Oxford Xcalibur four-circle diffractometer;<sup>2</sup> for **5r**, an STOE IPDS was used and for **6a** the STOE IPDS2 was used. Data collection followed in all cases the standard procedures. The same is true for the refinement using the SHELX program system.<sup>3</sup> The DIAMOND<sup>4</sup> software was used for the figures showing the crystal structures presented in this paper.

CCDC 1902138 (**5a**), CCDC 1906570 (**5r**), and CCDC 1906571 (**6a**) contain the supplementary crystallographic data for this paper. The data can be obtained free of charge from The Cambridge Crystallographic Data Centre via [www.ccdc.cam.ac.uk/structures](http://www.ccdc.cam.ac.uk/structures).

---

<sup>2</sup> Oxford diffraction. CryAlis<sup>PRO</sup> Version 1.171.34.44, Oxford, UK, **2010**.

<sup>3</sup> Sheldrick. G. M. *Acta Crystallogr.* **2015**, C71, 3-8. doi: 10.1107/S2053229614024218

<sup>4</sup> Brandenburg, K.: *DIAMOND*. Visual Crystal Structure Information System. Version 4.5.2. Crystal Impact, Bonn, Germany, 2018.

## 6.1 Crystal structure of *tert*-butyl 5-benzoyl-5-hydroxy-3-phenyl-4,5-dihydro-1*H*-pyrazole-1-carboxylate (5a)

### Crystal data and the results of the structure refinement for 5a

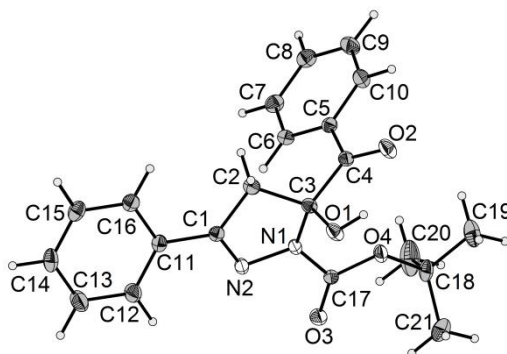

#### Identification code

CCDC 1902138

Empirical formula:

C<sub>21</sub>H<sub>22</sub>N<sub>2</sub>O<sub>4</sub>

Formula weight:

366.40 g/mol

Temperature:

129 K

Wavelength:

0.71073 Å

Crystal system:

monoclinic

Space group

*P*2<sub>1</sub>/*n*

Unit cell dimensions:

*a* = 9.9453(3) Å

*b* = 18.3337(4) Å

*c* = 11.4431(4) Å

$\beta$  = 113.377(4)°

Volume:

1915.22(10) Å<sup>3</sup>

*Z*:

4

Density (calculated):

1.271 mg/m<sup>3</sup>

Absorption coefficient  $\mu$ :

0.09 mm<sup>-1</sup>

Structural factor *F*(000):

776

Crystal size:

0.5 x 0.4 x 0.3 mm<sup>3</sup>

Theta range of data collection:

3.0 to 29.0° \*

Index ranges:

-12 ≤ *h* ≤ 13, -22 ≤ *k* ≤ 23, -14 ≤ *l* ≤ 6

Reflections collected:

8382

Independent reflections:

4366 [*R*<sub>int</sub> = 0.021]

Goodness-of-fit of *F*<sup>2</sup>:

1.05

Final *R* indices [*I* > 2σ(*I*)]

*R*1 = 0.0409, *wR*2 = 0.0735

Final *R* indices [all]:

*R*1 = 0.0565, *wR*2 = 0.0798

Largest diff. Peak and hole:

0.34 und -0.23 eÅ<sup>-3</sup>

\*Completeness >99% up to theta = 25°.

## 6.2 Crystal structure of (5-hydroxy-3-(4-methoxyphenyl)-1-(thiophen-2-carbonyl)-4,5-dihydro-1*H*-pyrazol-5-yl) (mesityl)methanone (5r)

### Crystal data and the results of the structure refinement for 5r

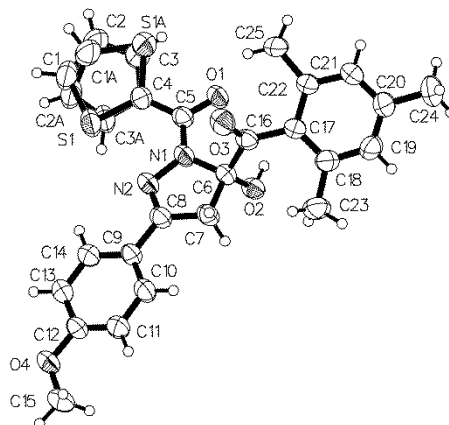

#### Identification code:

**CCDC 1906570**

Empirical formula:

$C_{25}H_{24}N_2O_4S$

Formula weight:

448.52 g/mol

Temperature:

291(2) K

Wavelength:

0.71073 Å

Crystal system:

monoclinic

Space group

$P2_1/c$

Unit cell dimensions:

$a = 11.0332(9)$  Å       $\alpha = 90^\circ$   
 $b = 9.9343(4)$  Å       $\beta = 93.042(9)^\circ$   
 $c = 20.1694(15)$  Å       $\gamma = 90^\circ$

Volume:

2207.6(3) Å<sup>3</sup>

Z:

4

Density (calculated):

1.349 mg/m<sup>3</sup>

Absorption coefficient  $\mu$ :

0.182 mm<sup>-1</sup>

Structural factor  $F(000)$ :

944

Crystal size:

0.4 x 0.4 x 0.4 mm<sup>3</sup>

Theta range of data collection:

2.67 to 25.00°

Index ranges:

$-13 \leq h \leq 13$ ,  $-11 \leq k \leq 11$ ,  $-23 \leq l \leq 23$

Reflections collected:

27965

Independent reflections:

3878 [ $R_{\text{int}} = 0.0661$ ]

Goodness-of-fit of  $F^2$ :

1.017

Final  $R$  indices [ $I > 2\sigma(I)$ ]

$R1 = 0.0392$ ,  $wR2 = 0.1099$

Final  $R$  indices [all]:

$R1 = 0.0496$ ,  $wR2 = 0.1144$

Largest diff. Peak and hole:

0.215 und -0.164 e.Å<sup>-3</sup>

### 6.3 Crystal structure of phenyl(3-phenyl-1H-pyrazol-5-yl)methanone (6a)

#### Crystal data and the results of the structure refinement for 6a

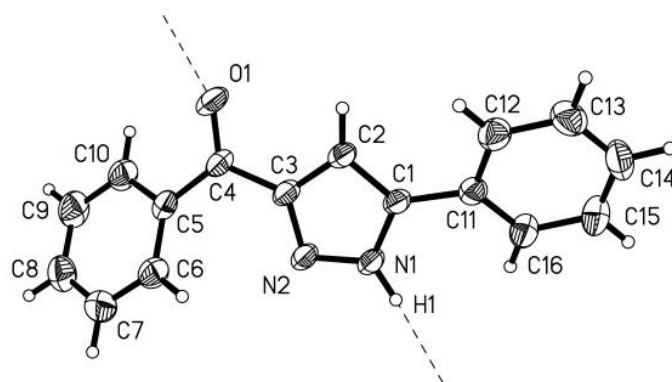

#### Identification code

Empirical formula

Formula weight

Temperature

Wavelength

Crystal system

Space group

Unit cell dimensions

#### CCDC 1906571

C<sub>16</sub>H<sub>12</sub>N<sub>2</sub>O

248.28

291(2) K

0.71073 Å

Monoclinic

*Cc*

*a* = 26.1458(17) Å

$\alpha = 90^\circ$

*b* = 6.9379(3) Å

$\beta = 100.656(5)^\circ$

*c* = 7.1310(4) Å

$\gamma = 90^\circ$

Volume

1271.24(12) Å<sup>3</sup>

*Z*

4

Density (calculated)

1.297 Mg/m

Absorption coefficient

0.083 mm<sup>-1</sup>

*F*(000)

520

Crystal size

0.45 x 0.4 x 0.4 mm<sup>3</sup>

Theta range for data collection

3.04 to 24.99°

Index ranges

-30 ≤ *h* ≤ 30, -8 ≤ *k* ≤ 8, -8 ≤ *l* ≤ 7

Reflections collected

4609

Independent reflections

1119 [*R*<sub>int</sub> = 0.0635]

Completeness to theta = 24.99°

99.6%

Absorption correction

None

Refinement method

Full-matrix least-squares on *F*<sup>2</sup>

Data / restraints / parameters

1942 / 2 / 173

Goodness-of-fit on *F*<sup>2</sup>

1.124

Final *R* indices [*I* > 2σ(*I*)]

*R*1 = 0.0414, *wR*2 = 0.1051

Final *R* indices [all]:

*R*1 = 0.0447, *wR*2 = 0.1077

Absolute structure parameter

-4.6(10)

Largest diff. peak and hole

0.149 and -0.162 e.Å<sup>-3</sup>
